# Supplementary material
Source: PubMed Central journal article supplement (PMC3571267)
Supplement: CVI.00530-12_zcd999094646so1.pdf [file CVI.00530-12_zcd999094646so1.pdf]

**Table S1 List of differentially expressed poly IC(H) responsive genes in macrophages (VL- vs VL+)**

| Probe        | Gene.symbols | poly I:C log2(FC) | poly I:C FDR | avg VL- log2(FC) | avg VL+ log2(FC) | two-way log2(FC) | twoWay p.value |
|--------------|--------------|-------------------|--------------|------------------|------------------|------------------|----------------|
| ILMN_3236653 | RNU1-5       | 0.73              | 3.81E-05     | 0.97             | 0.50             | 0.47             | 0.0064         |
| ILMN_3244646 | RNU1G2       | 0.65              | 1.75E-04     | 0.85             | 0.45             | 0.40             | 0.0119         |
| ILMN_3246273 | RNU1-3       | 0.68              | 9.75E-05     | 0.87             | 0.49             | 0.38             | 0.0165         |
| ILMN_3299187 | LOC728782    | -0.77             | 1.29E-11     | -0.91            | -0.63            | -0.28            | 0.0166         |
| ILMN_1721113 | HLA-C        | 0.93              | 5.19E-04     | 1.09             | 0.76             | 0.33             | 0.0309         |
| ILMN_1715131 | CCR7         | 1.44              | 9.66E-05     | 2.01             | 0.88             | 1.13             | 0.0364         |
| ILMN_1748904 | WTAP         | 1.17              | 4.64E-13     | 1.36             | 0.98             | 0.38             | 0.0401         |
| ILMN_1770031 | ABHD10       | -0.65             | 1.99E-10     | -0.75            | -0.54            | -0.21            | 0.0444         |
| ILMN_1808587 | ZFH3         | -0.60             | 5.22E-06     | -0.49            | -0.72            | 0.23             | 0.0521         |
| ILMN_1813625 | TRIM25       | 0.66              | 3.64E-13     | 0.56             | 0.76             | -0.20            | 0.0531         |
| ILMN_2170814 | LAMP3        | 0.93              | 3.61E-06     | 1.22             | 0.64             | 0.58             | 0.0549         |
| ILMN_1764201 | MAP2         | 0.62              | 9.76E-07     | 0.80             | 0.44             | 0.36             | 0.0563         |
| ILMN_1671478 | CKB          | 0.75              | 3.57E-03     | 1.01             | 0.49             | 0.52             | 0.0569         |
| ILMN_1892638 |              | -0.78             | 1.42E-06     | -0.94            | -0.62            | -0.32            | 0.0589         |
| ILMN_3278157 | LOC653156    | -1.28             | 5.05E-13     | -1.44            | -1.11            | -0.33            | 0.0598         |
| ILMN_1758938 | SLC31A2      | 0.82              | 9.37E-11     | 0.99             | 0.65             | 0.34             | 0.0614         |
| ILMN_3283775 | LOC100131205 | -0.96             | 1.00E-11     | -1.09            | -0.83            | -0.27            | 0.0622         |
| ILMN_2290808 | RPL21        | -0.78             | 2.25E-12     | -0.89            | -0.67            | -0.21            | 0.0624         |
| ILMN_2373062 | RHBDF2       | 0.60              | 2.63E-06     | 0.74             | 0.46             | 0.29             | 0.0642         |
| ILMN_3215954 | LOC653079    | -0.86             | 1.04E-13     | -0.97            | -0.74            | -0.23            | 0.0642         |
| ILMN_1743747 | RUSC1        | 0.78              | 1.30E-14     | 0.88             | 0.69             | 0.19             | 0.0699         |
| ILMN_1810191 | PLA2G4C      | 0.65              | 2.34E-03     | 0.81             | 0.49             | 0.32             | 0.0701         |
| ILMN_2340259 | PDE4B        | 1.02              | 9.75E-09     | 1.23             | 0.81             | 0.42             | 0.0725         |
| ILMN_1707339 | BTG3         | 0.83              | 1.39E-12     | 0.95             | 0.70             | 0.25             | 0.0755         |
| ILMN_1762725 | EIF3L        | -0.70             | 3.45E-12     | -0.80            | -0.60            | -0.20            | 0.0776         |
| ILMN_2355953 | LILRB4       | 1.59              | 2.13E-14     | 1.77             | 1.41             | 0.36             | 0.0777         |
| ILMN_1799725 | DOCK2        | -0.98             | 2.79E-07     | -1.08            | -0.88            | -0.20            | 0.0787         |
| ILMN_1785732 | TNFAIP6      | 2.28              | 9.48E-09     | 2.74             | 1.82             | 0.92             | 0.0800         |
| ILMN_3236463 | LOC285296    | 0.74              | 8.87E-09     | 0.87             | 0.62             | 0.25             | 0.0811         |
| ILMN_1682245 | IFNB1        | 2.55              | 1.72E-11     | 2.93             | 2.16             | 0.78             | 0.0819         |
| ILMN_2396444 | CD14         | -1.06             | 1.83E-02     | -1.27            | -0.84            | -0.43            | 0.0858         |
| ILMN_2374164 | HERPUD1      | 0.86              | 1.14E-13     | 0.98             | 0.75             | 0.23             | 0.0873         |
| ILMN_1804277 | SPRED1       | -1.12             | 2.65E-09     | -1.31            | -0.94            | -0.37            | 0.0919         |
| ILMN_1729915 | PILRA        | 0.83              | 6.00E-11     | 0.94             | 0.73             | 0.21             | 0.0929         |
| ILMN_1882590 |              | -0.74             | 3.32E-11     | -0.86            | -0.63            | -0.23            | 0.0930         |
| ILMN_2110561 | IFNA8        | 0.84              | 7.26E-07     | 1.04             | 0.64             | 0.41             | 0.0938         |
| ILMN_1703949 | KPNB1        | 0.63              | 3.31E-15     | 0.73             | 0.54             | 0.19             | 0.0971         |
| ILMN_2382354 | SEN7         | 0.60              | 5.48E-06     | 0.77             | 0.43             | 0.34             | 0.0974         |
| ILMN_2358541 | RBMS1        | 0.83              | 1.27E-13     | 0.92             | 0.73             | 0.19             | 0.0986         |
| ILMN_1655469 | TSPAN3       | 0.66              | 1.80E-08     | 0.75             | 0.56             | 0.20             | 0.0988         |
| ILMN_2362858 | PILRA        | 0.76              | 1.26E-06     | 0.92             | 0.59             | 0.33             | 0.0996         |
| ILMN_1691717 | RHBDF2       | 0.60              | 4.36E-06     | 0.74             | 0.47             | 0.27             | 0.0998         |
| ILMN_2106725 | NCF1B        | 0.93              | 3.86E-07     | 1.15             | 0.71             | 0.44             | 0.0998         |
| ILMN_1737580 | PPPDE2       | 0.73              | 2.56E-11     | 0.82             | 0.63             | 0.19             | 0.1008         |
| ILMN_1718297 | EML4         | -0.78             | 2.16E-10     | -0.88            | -0.67            | -0.21            | 0.1078         |
| ILMN_1716736 | CD80         | 1.69              | 2.82E-10     | 1.94             | 1.44             | 0.50             | 0.1086         |
| ILMN_1719224 | C17orf45     | -0.60             | 8.25E-06     | -0.72            | -0.47            | -0.24            | 0.1103         |
| ILMN_1730710 | ADORA3       | -0.86             | 4.76E-02     | -1.06            | -0.65            | -0.41            | 0.1113         |
| ILMN_1752755 | VWF          | -0.67             | 4.87E-06     | -0.80            | -0.55            | -0.25            | 0.1126         |
| ILMN_1794038 | FAM49A       | 0.64              | 2.94E-07     | 0.77             | 0.51             | 0.27             | 0.1145         |
| ILMN_1660376 | LOC387841    | -0.61             | 2.27E-12     | -0.71            | -0.52            | -0.19            | 0.1149         |
| ILMN_1664595 | IFNA13       | 1.37              | 3.36E-08     | 1.63             | 1.10             | 0.52             | 0.1154         |
| ILMN_1694268 | HES6         | -0.63             | 1.39E-03     | -0.75            | -0.52            | -0.23            | 0.1155         |
| ILMN_1755808 | LOC654194    | -0.95             | 6.96E-07     | -1.16            | -0.75            | -0.41            | 0.1173         |
| ILMN_1799106 | MOSC1        | -0.64             | 5.30E-07     | -0.76            | -0.52            | -0.24            | 0.1188         |
| ILMN_1746368 | SELT         | -0.63             | 2.49E-09     | -0.71            | -0.55            | -0.16            | 0.1189         |
| ILMN_3275489 | LOC100131905 | -0.68             | 2.75E-06     | -0.82            | -0.54            | -0.28            | 0.1206         |
| ILMN_1898723 |              | -0.87             | 1.26E-07     | -1.00            | -0.73            | -0.27            | 0.1212         |
| ILMN_1806725 | PDCD1        | 0.66              | 2.36E-07     | 0.80             | 0.52             | 0.28             | 0.1229         |
| ILMN_1740015 | CD14         | -1.10             | 2.36E-02     | -1.27            | -0.93            | -0.35            | 0.1239         |
| ILMN_1775330 | C15orf52     | -0.72             | 5.22E-09     | -0.85            | -0.60            | -0.24            | 0.1244         |
| ILMN_2235851 | LINC1        | 2.94              | 2.24E-14     | 3.26             | 2.62             | 0.64             | 0.1244         |
| ILMN_1778321 | SLC2A6       | 1.05              | 8.38E-08     | 1.26             | 0.85             | 0.41             | 0.1251         |
| ILMN_1734316 | YME1L1       | 0.65              | 6.06E-12     | 0.73             | 0.57             | 0.16             | 0.1251         |
| ILMN_1775743 | BTG1         | 0.98              | 4.14E-06     | 1.23             | 0.73             | 0.49             | 0.1271         |
| ILMN_1652680 | LOC652616    | 1.89              | 2.53E-09     | 2.20             | 1.58             | 0.62             | 0.1272         |
| ILMN_1720048 | CCL2         | 2.21              | 3.26E-08     | 1.99             | 2.43             | -0.44            | 0.1288         |
| ILMN_1676358 | RALB         | 1.45              | 1.41E-21     | 1.53             | 1.36             | 0.17             | 0.1297         |
| ILMN_2059505 | ARPP19       | -0.65             | 4.56E-14     | -0.73            | -0.57            | -0.16            | 0.1314         |
| ILMN_1705737 | IMPDH2       | -0.77             | 4.53E-08     | -0.89            | -0.65            | -0.24            | 0.1315         |
| ILMN_2349393 | MDK          | 1.08              | 8.21E-09     | 1.29             | 0.88             | 0.41             | 0.1317         |
| ILMN_1700695 | SLC44A1      | 0.65              | 1.14E-06     | 0.76             | 0.53             | 0.23             | 0.1333         |
| ILMN_1739222 | ETV5         | -0.68             | 4.53E-03     | -0.80            | -0.57            | -0.23            | 0.1349         |
| ILMN_3290199 | LOC441073    | -0.63             | 1.17E-11     | -0.71            | -0.55            | -0.16            | 0.1357         |

|              |              |       |          |       |       |       |        |
|--------------|--------------|-------|----------|-------|-------|-------|--------|
| ILMN_1761463 | EFHD2        | -0.69 | 4.18E-09 | -0.80 | -0.58 | -0.23 | 0.1377 |
| ILMN_1747058 | TRAPPC2L     | -0.67 | 1.00E-06 | -0.78 | -0.57 | -0.21 | 0.1379 |
| ILMN_1790533 | PHACTR2      | 0.72  | 1.39E-11 | 0.82  | 0.62  | 0.20  | 0.1390 |
| ILMN_1726597 | FAM65B       | 0.74  | 1.69E-07 | 0.90  | 0.59  | 0.31  | 0.1403 |
| ILMN_1659352 | KCNK13       | -0.78 | 1.55E-09 | -0.88 | -0.68 | -0.20 | 0.1409 |
| ILMN_3219806 | LOC643384    | 1.11  | 1.88E-09 | 1.25  | 0.98  | 0.26  | 0.1426 |
| ILMN_1672295 | ZC3H12A      | 0.67  | 1.81E-10 | 0.77  | 0.58  | 0.19  | 0.1426 |
| ILMN_1697420 | TINF2        | 1.05  | 1.75E-10 | 1.20  | 0.90  | 0.29  | 0.1437 |
| ILMN_1792922 | SOD2         | 1.11  | 1.08E-09 | 1.30  | 0.93  | 0.37  | 0.1442 |
| ILMN_1811104 | KTELC1       | 0.60  | 2.92E-05 | 0.74  | 0.46  | 0.28  | 0.1447 |
| ILMN_2402806 | TRPC4AP      | 0.67  | 3.41E-11 | 0.77  | 0.58  | 0.19  | 0.1450 |
| ILMN_3283155 | LOC642357    | -0.65 | 6.46E-09 | -0.74 | -0.56 | -0.18 | 0.1451 |
| ILMN_2358652 | NXF1         | 0.59  | 1.58E-09 | 0.52  | 0.66  | -0.14 | 0.1472 |
| ILMN_1704730 | CD93         | -0.82 | 5.15E-05 | -0.64 | -1.00 | 0.36  | 0.1481 |
| ILMN_1793220 | GART         | 0.83  | 9.63E-17 | 0.91  | 0.75  | 0.16  | 0.1501 |
| ILMN_1810725 | FAM129A      | 0.83  | 4.78E-06 | 1.03  | 0.64  | 0.39  | 0.1506 |
| ILMN_2095759 | OGFRL1       | 0.99  | 3.18E-12 | 1.10  | 0.88  | 0.21  | 0.1513 |
| ILMN_3237177 | FAM175A      | 1.72  | 4.29E-12 | 1.94  | 1.50  | 0.43  | 0.1531 |
| ILMN_1686573 | DEFB1        | 1.88  | 2.86E-08 | 2.20  | 1.56  | 0.64  | 0.1536 |
| ILMN_1651776 | FHOD1        | -0.73 | 1.13E-10 | -0.83 | -0.63 | -0.20 | 0.1564 |
| ILMN_1777740 | C8orf55      | -0.63 | 9.92E-07 | -0.72 | -0.53 | -0.19 | 0.1578 |
| ILMN_3259223 | LOC100129685 | -1.36 | 6.56E-13 | -1.49 | -1.22 | -0.26 | 0.1606 |
| ILMN_2415979 | KIAA1751     | 1.52  | 1.57E-10 | 1.72  | 1.31  | 0.40  | 0.1614 |
| ILMN_1685703 | ACOX2        | -0.69 | 1.02E-03 | -0.82 | -0.56 | -0.26 | 0.1617 |
| ILMN_1733690 | AKAP7        | 0.78  | 2.10E-07 | 0.91  | 0.66  | 0.25  | 0.1628 |
| ILMN_1745021 | SLC30A1      | 0.73  | 1.80E-09 | 0.83  | 0.64  | 0.19  | 0.1646 |
| ILMN_1811823 | MED25        | 0.61  | 1.12E-08 | 0.72  | 0.51  | 0.21  | 0.1654 |
| ILMN_1665682 | IL15RA       | 1.35  | 7.33E-13 | 1.50  | 1.20  | 0.30  | 0.1667 |
| ILMN_3281294 | LOC643384    | 0.81  | 5.63E-13 | 0.89  | 0.73  | 0.16  | 0.1678 |
| ILMN_1728799 | FBP1         | -0.67 | 4.12E-04 | -0.77 | -0.57 | -0.19 | 0.1692 |
| ILMN_2337655 | WARS         | 0.96  | 1.82E-06 | 1.10  | 0.81  | 0.29  | 0.1725 |
| ILMN_2112988 | NCF1C        | 3.36  | 1.71E-11 | 3.73  | 2.99  | 0.74  | 0.1745 |
| ILMN_1808707 | FSCN1        | -0.72 | 3.73E-03 | -0.59 | -0.85 | 0.26  | 0.1758 |
| ILMN_2405602 | OSBPL1A      | 0.75  | 5.28E-07 | 0.84  | 0.65  | 0.19  | 0.1774 |
| ILMN_1773352 | CCL5         | 2.83  | 1.77E-10 | 3.20  | 2.45  | 0.75  | 0.1788 |
| ILMN_3238058 | LOC151162    | -0.90 | 3.65E-13 | -0.99 | -0.82 | -0.17 | 0.1791 |
| ILMN_1679837 | SGPP1        | 0.61  | 3.07E-09 | 0.69  | 0.52  | 0.17  | 0.1793 |
| ILMN_1728605 | TTC3         | -1.10 | 2.50E-14 | -1.22 | -0.99 | -0.23 | 0.1798 |
| ILMN_1807114 | LOC255620    | 0.74  | 9.58E-11 | 0.83  | 0.65  | 0.17  | 0.1801 |
| ILMN_1838319 | LOC730249    | 0.69  | 9.62E-05 | 0.87  | 0.51  | 0.36  | 0.1810 |
| ILMN_2406501 | SOD2         | 1.73  | 8.67E-11 | 1.96  | 1.49  | 0.46  | 0.1815 |
| ILMN_3240222 | PRAGMIN      | -0.63 | 3.39E-05 | -0.75 | -0.52 | -0.23 | 0.1816 |
| ILMN_1709772 | SNX5         | -0.61 | 1.86E-08 | -0.70 | -0.53 | -0.17 | 0.1842 |
| ILMN_1690342 | LTA4H        | -1.23 | 9.32E-10 | -1.37 | -1.09 | -0.29 | 0.1854 |
| ILMN_2415144 | SP110        | 3.08  | 3.30E-26 | 3.19  | 2.97  | 0.22  | 0.1855 |
| ILMN_1653856 | STS-1        | -1.35 | 1.04E-11 | -1.53 | -1.17 | -0.36 | 0.1860 |
| ILMN_2096405 | WDR37        | -0.60 | 6.01E-14 | -0.53 | -0.66 | 0.13  | 0.1882 |
| ILMN_1686152 | GGA2         | -0.72 | 5.89E-07 | -0.83 | -0.61 | -0.21 | 0.1883 |
| ILMN_1733511 | GOLGA3       | -0.71 | 3.75E-11 | -0.81 | -0.61 | -0.20 | 0.1885 |
| ILMN_2262275 | TRIM13       | 0.66  | 2.15E-08 | 0.75  | 0.57  | 0.18  | 0.1886 |
| ILMN_1660436 | HSPA1B       | 1.14  | 6.21E-10 | 1.29  | 0.98  | 0.31  | 0.1890 |
| ILMN_1710923 | SLAMF7       | 0.93  | 5.07E-07 | 1.07  | 0.80  | 0.27  | 0.1895 |
| ILMN_1776778 | PARP15       | 0.78  | 5.92E-09 | 0.89  | 0.66  | 0.23  | 0.1899 |
| ILMN_1719695 | NFKBIZ       | 0.77  | 7.33E-06 | 0.88  | 0.67  | 0.21  | 0.1911 |
| ILMN_2195821 | C5orf41      | 0.72  | 4.05E-06 | 0.88  | 0.56  | 0.32  | 0.1925 |
| ILMN_1698231 | RRM2B        | 0.71  | 5.04E-12 | 0.80  | 0.62  | 0.18  | 0.1926 |
| ILMN_1739594 | ACOT11       | -0.86 | 2.92E-08 | -1.00 | -0.73 | -0.28 | 0.1945 |
| ILMN_1725314 | GBP3         | 0.69  | 1.64E-08 | 0.78  | 0.60  | 0.19  | 0.1967 |
| ILMN_2241953 | PILRA        | 1.13  | 2.44E-13 | 1.22  | 1.04  | 0.18  | 0.1975 |
| ILMN_3271122 | LOC100129742 | -0.67 | 6.04E-12 | -0.75 | -0.60 | -0.15 | 0.2005 |
| ILMN_3249435 | UBASH3B      | -0.59 | 3.11E-11 | -0.68 | -0.50 | -0.18 | 0.2010 |
| ILMN_1734707 | CHST13       | -1.14 | 2.63E-06 | -1.26 | -1.01 | -0.25 | 0.2017 |
| ILMN_2390586 | SP100        | 0.69  | 2.07E-13 | 0.77  | 0.62  | 0.15  | 0.2017 |
| ILMN_1776788 | C5orf41      | 0.61  | 3.70E-05 | 0.78  | 0.45  | 0.32  | 0.2021 |
| ILMN_1715636 | EIF3B        | -0.64 | 6.98E-12 | -0.71 | -0.56 | -0.15 | 0.2022 |
| ILMN_2109416 | NAPSB        | 0.79  | 1.53E-04 | 0.63  | 0.95  | -0.31 | 0.2022 |
| ILMN_1695485 | C9orf109     | 0.65  | 1.62E-10 | 0.73  | 0.56  | 0.17  | 0.2030 |
| ILMN_1696046 | SIVA         | -0.60 | 5.47E-12 | -0.53 | -0.66 | 0.14  | 0.2038 |
| ILMN_3239965 | IDO1         | 3.80  | 2.55E-12 | 4.20  | 3.39  | 0.81  | 0.2045 |
| ILMN_2134381 | C14orf85     | 0.61  | 1.86E-05 | 0.73  | 0.49  | 0.24  | 0.2049 |
| ILMN_2089073 | ATP9A        | -0.79 | 2.95E-03 | -0.90 | -0.68 | -0.22 | 0.2050 |
| ILMN_1709683 | RASSF2       | -0.71 | 1.93E-08 | -0.81 | -0.62 | -0.20 | 0.2057 |
| ILMN_1656310 | INDO         | 3.79  | 2.76E-12 | 4.19  | 3.39  | 0.80  | 0.2059 |
| ILMN_1652525 | FAM125B      | 1.10  | 2.92E-10 | 1.22  | 0.98  | 0.24  | 0.2073 |
| ILMN_1718734 | MLLT6        | 0.89  | 1.38E-11 | 1.00  | 0.79  | 0.21  | 0.2075 |
| ILMN_1702691 | TNFAIP3      | 0.90  | 1.03E-08 | 1.04  | 0.76  | 0.28  | 0.2085 |

|              |              |       |          |       |       |       |        |
|--------------|--------------|-------|----------|-------|-------|-------|--------|
| ILMN_2367818 | CD40         | 0.74  | 2.63E-07 | 0.86  | 0.62  | 0.24  | 0.2087 |
| ILMN_3245569 | LOC731528    | 0.69  | 3.64E-13 | 0.75  | 0.62  | 0.13  | 0.2105 |
| ILMN_1680192 | APOBEC3A     | 1.98  | 1.31E-09 | 2.24  | 1.72  | 0.53  | 0.2115 |
| ILMN_2246328 | PTPN22       | -0.61 | 5.76E-07 | -0.70 | -0.52 | -0.18 | 0.2123 |
| ILMN_1779257 | CD40         | 1.56  | 9.45E-11 | 1.71  | 1.41  | 0.30  | 0.2129 |
| ILMN_3301065 | LOC728590    | -0.65 | 3.55E-12 | -0.71 | -0.59 | -0.12 | 0.2130 |
| ILMN_1795719 | RPA1         | -0.81 | 1.29E-14 | -0.90 | -0.73 | -0.17 | 0.2131 |
| ILMN_1681628 | ZNF277       | 0.79  | 3.44E-10 | 0.90  | 0.69  | 0.22  | 0.2148 |
| ILMN_1724789 | CD59         | -0.60 | 1.70E-07 | -0.69 | -0.52 | -0.17 | 0.2153 |
| ILMN_1697309 | NCF1         | 3.76  | 2.01E-12 | 4.11  | 3.42  | 0.68  | 0.2177 |
| ILMN_2186061 | PFKFB3       | 1.52  | 2.80E-10 | 1.69  | 1.35  | 0.33  | 0.2179 |
| ILMN_1660847 | PFKFB3       | 0.96  | 2.02E-09 | 1.08  | 0.83  | 0.25  | 0.2183 |
| ILMN_1701461 | TIMP3        | -0.63 | 9.74E-03 | -0.75 | -0.50 | -0.25 | 0.2195 |
| ILMN_1652164 | LOC729196    | 0.67  | 7.39E-13 | 0.74  | 0.60  | 0.14  | 0.2199 |
| ILMN_1660462 | MCOLN2       | 2.47  | 6.52E-14 | 2.68  | 2.26  | 0.42  | 0.2202 |
| ILMN_1776181 | BIRC3        | 1.30  | 7.66E-10 | 1.45  | 1.14  | 0.31  | 0.2203 |
| ILMN_1672606 | OAS1         | 1.10  | 2.38E-09 | 0.97  | 1.24  | -0.27 | 0.2206 |
| ILMN_1764228 | DAB2         | -0.64 | 3.23E-08 | -0.74 | -0.55 | -0.20 | 0.2209 |
| ILMN_3243142 | KAT2B        | 0.93  | 1.25E-10 | 1.03  | 0.83  | 0.20  | 0.2224 |
| ILMN_1815668 | GTF2IP1      | 0.65  | 7.06E-09 | 0.72  | 0.57  | 0.15  | 0.2230 |
| ILMN_1744212 | INPP5D       | 0.65  | 1.60E-04 | 0.77  | 0.54  | 0.22  | 0.2245 |
| ILMN_1684887 | SAMSN1       | 1.03  | 9.12E-04 | 1.18  | 0.89  | 0.29  | 0.2248 |
| ILMN_1723912 | IFI44L       | 4.92  | 1.10E-25 | 5.08  | 4.77  | 0.31  | 0.2249 |
| ILMN_2284744 | HNMT         | -0.66 | 1.36E-04 | -0.74 | -0.59 | -0.15 | 0.2258 |
| ILMN_1672504 | PDXK         | -1.54 | 1.22E-12 | -1.68 | -1.39 | -0.29 | 0.2260 |
| ILMN_2284998 | SP100        | 1.02  | 3.98E-11 | 1.12  | 0.91  | 0.21  | 0.2276 |
| ILMN_3235832 | LOC728835    | 2.17  | 1.95E-10 | 2.36  | 1.99  | 0.37  | 0.2282 |
| ILMN_2393046 | NHLRC3       | 0.73  | 5.95E-08 | 0.83  | 0.63  | 0.20  | 0.2287 |
| ILMN_1697469 | SFRS6        | -0.66 | 7.20E-08 | -0.76 | -0.56 | -0.20 | 0.2289 |
| ILMN_1727043 | GLT25D1      | -0.68 | 9.54E-13 | -0.75 | -0.61 | -0.15 | 0.2289 |
| ILMN_1772459 | RPS23        | -0.74 | 1.17E-04 | -0.86 | -0.63 | -0.24 | 0.2297 |
| ILMN_1727813 | BRP44        | -0.67 | 1.57E-07 | -0.75 | -0.59 | -0.16 | 0.2303 |
| ILMN_1693452 | GAL3ST4      | -1.08 | 2.87E-03 | -1.26 | -0.90 | -0.36 | 0.2307 |
| ILMN_2329958 | ABI1         | 0.65  | 1.80E-12 | 0.73  | 0.58  | 0.16  | 0.2309 |
| ILMN_1655987 | STAB1        | -0.87 | 8.87E-03 | -0.97 | -0.77 | -0.20 | 0.2310 |
| ILMN_1766657 | STOM         | 0.81  | 1.16E-08 | 0.92  | 0.70  | 0.22  | 0.2312 |
| ILMN_1683096 | ASB1         | -0.87 | 1.99E-14 | -0.94 | -0.80 | -0.14 | 0.2312 |
| ILMN_1747630 | DEK          | 0.82  | 1.08E-11 | 0.92  | 0.71  | 0.21  | 0.2321 |
| ILMN_1769546 | RIN2         | 0.69  | 3.97E-05 | 0.78  | 0.60  | 0.18  | 0.2329 |
| ILMN_1705224 | TMEM110      | 1.47  | 2.72E-11 | 1.63  | 1.30  | 0.32  | 0.2333 |
| ILMN_2098126 | CCL5         | 3.37  | 5.26E-11 | 3.76  | 2.98  | 0.78  | 0.2335 |
| ILMN_2336781 | SOD2         | 1.73  | 3.06E-11 | 1.93  | 1.52  | 0.42  | 0.2339 |
| ILMN_1795285 | PHF15        | 1.41  | 2.24E-11 | 1.55  | 1.27  | 0.28  | 0.2358 |
| ILMN_1749009 | REXO2        | -0.63 | 8.48E-12 | -0.69 | -0.56 | -0.13 | 0.2362 |
| ILMN_1660923 | HCG4         | 1.31  | 7.84E-11 | 1.42  | 1.21  | 0.21  | 0.2367 |
| ILMN_1872759 |              | 0.89  | 1.14E-11 | 0.98  | 0.80  | 0.19  | 0.2371 |
| ILMN_2373831 | BTN3A3       | 0.97  | 1.33E-10 | 1.08  | 0.85  | 0.23  | 0.2372 |
| ILMN_1667030 | HSBP1        | -0.62 | 8.01E-08 | -0.70 | -0.53 | -0.16 | 0.2376 |
| ILMN_2193591 | UNC93B1      | 0.86  | 1.06E-08 | 0.95  | 0.77  | 0.19  | 0.2382 |
| ILMN_1747197 | SLC41A2      | 0.98  | 2.55E-10 | 1.09  | 0.87  | 0.22  | 0.2389 |
| ILMN_2130441 | HLA-H        | 0.78  | 5.02E-10 | 0.86  | 0.69  | 0.17  | 0.2419 |
| ILMN_3249261 | LOC100132299 | -0.86 | 6.53E-16 | -0.94 | -0.77 | -0.17 | 0.2422 |
| ILMN_1659771 | LOC645683    | -0.60 | 1.07E-07 | -0.69 | -0.50 | -0.19 | 0.2424 |
| ILMN_1758418 | TNFSF13B     | 2.81  | 5.51E-20 | 2.96  | 2.66  | 0.29  | 0.2429 |
| ILMN_1698186 | IFNA2        | 0.87  | 2.89E-06 | 1.03  | 0.70  | 0.32  | 0.2435 |
| ILMN_1659752 | LOC730996    | 1.03  | 5.04E-17 | 1.11  | 0.95  | 0.16  | 0.2440 |
| ILMN_1738712 | GPR180       | 0.66  | 3.57E-08 | 0.73  | 0.58  | 0.16  | 0.2440 |
| ILMN_2379469 | EIF3B        | -0.64 | 1.16E-09 | -0.71 | -0.58 | -0.14 | 0.2441 |
| ILMN_2337336 | PVRL2        | 0.92  | 4.79E-11 | 1.02  | 0.81  | 0.21  | 0.2448 |
| ILMN_1809467 | VAMP5        | 2.27  | 4.50E-12 | 2.48  | 2.06  | 0.42  | 0.2459 |
| ILMN_2150196 | LRRC25       | -0.78 | 5.37E-05 | -0.87 | -0.69 | -0.18 | 0.2459 |
| ILMN_1747305 | GIMAP8       | 0.77  | 6.75E-03 | 0.86  | 0.67  | 0.19  | 0.2463 |
| ILMN_1741165 | SLC11A1      | -0.65 | 2.03E-04 | -0.74 | -0.57 | -0.17 | 0.2489 |
| ILMN_1787567 | TSC22D1      | 0.72  | 2.63E-09 | 0.83  | 0.62  | 0.20  | 0.2493 |
| ILMN_2113535 | PCYOX1       | -0.72 | 9.44E-14 | -0.66 | -0.78 | 0.11  | 0.2496 |
| ILMN_1681721 | OASL         | 2.63  | 1.88E-17 | 2.80  | 2.47  | 0.33  | 0.2502 |
| ILMN_1652825 | IL10RA       | 1.26  | 3.36E-09 | 1.37  | 1.15  | 0.23  | 0.2530 |
| ILMN_1732278 | LOC730996    | 0.82  | 3.60E-14 | 0.90  | 0.73  | 0.17  | 0.2540 |
| ILMN_2087702 | MYH9         | -0.65 | 4.34E-10 | -0.73 | -0.57 | -0.16 | 0.2547 |
| ILMN_2388466 | TIA1         | 0.80  | 2.39E-13 | 0.89  | 0.72  | 0.16  | 0.2552 |
| ILMN_1785202 | STAT4        | 0.94  | 1.60E-07 | 1.03  | 0.85  | 0.19  | 0.2558 |
| ILMN_1727709 | GPBAR1       | 1.00  | 1.48E-05 | 1.17  | 0.83  | 0.34  | 0.2575 |
| ILMN_3290035 | LOC653737    | -0.86 | 4.95E-13 | -0.93 | -0.79 | -0.15 | 0.2576 |
| ILMN_2407851 | IL17RD       | 0.65  | 1.84E-09 | 0.74  | 0.56  | 0.18  | 0.2579 |
| ILMN_1858599 |              | 0.67  | 8.86E-12 | 0.74  | 0.59  | 0.15  | 0.2592 |
| ILMN_2087080 | RPL5         | -0.65 | 1.15E-11 | -0.71 | -0.59 | -0.12 | 0.2602 |

|              |              |       |          |       |       |       |        |
|--------------|--------------|-------|----------|-------|-------|-------|--------|
| ILMN_2182531 | C18orf55     | -0.72 | 2.20E-09 | -0.82 | -0.63 | -0.18 | 0.2614 |
| ILMN_2339825 | YME1L1       | 0.80  | 5.53E-17 | 0.86  | 0.75  | 0.11  | 0.2617 |
| ILMN_1726769 | CNDP2        | 0.59  | 6.62E-10 | 0.66  | 0.51  | 0.14  | 0.2624 |
| ILMN_1669599 | DENND4C      | -0.89 | 1.83E-13 | -0.95 | -0.83 | -0.13 | 0.2627 |
| ILMN_2338997 | PTP4A2       | -0.97 | 6.62E-10 | -1.06 | -0.89 | -0.17 | 0.2639 |
| ILMN_3273209 | FLJ10489     | 0.88  | 5.66E-09 | 1.00  | 0.77  | 0.23  | 0.2642 |
| ILMN_1693009 | FGL2         | 1.99  | 3.81E-08 | 2.16  | 1.81  | 0.35  | 0.2649 |
| ILMN_1706502 | EIF2AK2      | 2.59  | 1.57E-24 | 2.68  | 2.51  | 0.18  | 0.2659 |
| ILMN_1751330 | RBCK1        | 1.22  | 5.11E-14 | 1.31  | 1.13  | 0.18  | 0.2681 |
| ILMN_1711493 | PRAM1        | -0.98 | 6.43E-11 | -1.07 | -0.88 | -0.19 | 0.2681 |
| ILMN_1780465 | CLEC5A       | -1.35 | 3.93E-06 | -1.54 | -1.16 | -0.39 | 0.2689 |
| ILMN_1757845 | SPIRE1       | -0.60 | 8.48E-11 | -0.67 | -0.54 | -0.12 | 0.2690 |
| ILMN_1742382 | RIMS3        | -0.64 | 1.84E-12 | -0.70 | -0.57 | -0.13 | 0.2716 |
| ILMN_1771385 | GBP4         | 3.94  | 1.25E-17 | 4.18  | 3.69  | 0.49  | 0.2723 |
| ILMN_1740200 | LOC728216    | 1.18  | 6.68E-15 | 1.08  | 1.27  | -0.19 | 0.2726 |
| ILMN_1722492 | DUSP19       | 1.58  | 2.37E-11 | 1.71  | 1.44  | 0.27  | 0.2741 |
| ILMN_1705403 | CYP2S1       | -0.78 | 8.73E-09 | -0.70 | -0.86 | 0.15  | 0.2751 |
| ILMN_2129202 | IFNA14       | 0.76  | 4.44E-06 | 0.89  | 0.63  | 0.26  | 0.2776 |
| ILMN_1700671 | ETV7         | 0.62  | 2.84E-11 | 0.69  | 0.55  | 0.14  | 0.2778 |
| ILMN_1782487 | LOC400759    | 1.60  | 9.47E-14 | 1.73  | 1.47  | 0.26  | 0.2783 |
| ILMN_1654690 | CECR5        | -0.68 | 8.86E-12 | -0.75 | -0.61 | -0.14 | 0.2784 |
| ILMN_1785646 | PMP22        | -0.99 | 1.48E-02 | -1.13 | -0.84 | -0.28 | 0.2785 |
| ILMN_1758939 | RIPK2        | 1.24  | 5.00E-14 | 1.33  | 1.15  | 0.18  | 0.2785 |
| ILMN_1686664 | MT2A         | 0.89  | 4.81E-04 | 0.99  | 0.78  | 0.20  | 0.2792 |
| ILMN_1762594 | NOD2         | 0.71  | 1.91E-05 | 0.80  | 0.63  | 0.17  | 0.2797 |
| ILMN_1773063 | OSBPL1A      | 0.67  | 3.00E-08 | 0.75  | 0.60  | 0.15  | 0.2800 |
| ILMN_1796669 | PSEN1        | 0.60  | 8.72E-13 | 0.65  | 0.55  | 0.10  | 0.2807 |
| ILMN_1703123 | AXUD1        | 1.69  | 2.44E-20 | 1.59  | 1.79  | -0.20 | 0.2808 |
| ILMN_1733136 | IFNA16       | 0.61  | 4.91E-05 | 0.74  | 0.49  | 0.25  | 0.2809 |
| ILMN_1776777 | ADAR         | 1.40  | 5.93E-23 | 1.47  | 1.33  | 0.14  | 0.2811 |
| ILMN_1681301 | AIM2         | 2.17  | 3.95E-12 | 2.38  | 1.96  | 0.41  | 0.2817 |
| ILMN_1661888 | MEF2A        | 0.61  | 9.77E-15 | 0.66  | 0.56  | 0.10  | 0.2820 |
| ILMN_3264112 | LOC100129362 | 0.61  | 2.07E-05 | 0.72  | 0.51  | 0.21  | 0.2822 |
| ILMN_1703926 | PTGER2       | 1.24  | 7.58E-09 | 1.39  | 1.09  | 0.30  | 0.2823 |
| ILMN_1656292 | LOC388532    | -0.60 | 1.41E-10 | -0.66 | -0.54 | -0.13 | 0.2826 |
| ILMN_1714567 | AHNAK        | -0.64 | 1.54E-04 | -0.73 | -0.55 | -0.18 | 0.2835 |
| ILMN_1651496 | HIST1H2BD    | 0.66  | 5.57E-04 | 0.77  | 0.54  | 0.23  | 0.2842 |
| ILMN_1758623 | HIST1H2BD    | 0.61  | 2.63E-06 | 0.69  | 0.53  | 0.16  | 0.2855 |
| ILMN_3242315 | SNORD3D      | 0.67  | 3.86E-10 | 0.74  | 0.60  | 0.13  | 0.2898 |
| ILMN_1802708 | BTNA3A1      | 0.63  | 2.23E-10 | 0.71  | 0.56  | 0.15  | 0.2900 |
| ILMN_1755909 | C20orf11     | -0.73 | 4.27E-17 | -0.79 | -0.68 | -0.11 | 0.2902 |
| ILMN_2225144 | EIF4E3       | 0.85  | 6.15E-08 | 0.95  | 0.75  | 0.20  | 0.2908 |
| ILMN_1775708 | SLC2A3       | -1.26 | 1.77E-09 | -1.39 | -1.12 | -0.28 | 0.2909 |
| ILMN_2405684 | BIRC3        | 0.79  | 1.06E-07 | 0.90  | 0.68  | 0.22  | 0.2925 |
| ILMN_1734833 | NBN          | 1.33  | 1.08E-11 | 1.46  | 1.20  | 0.26  | 0.2926 |
| ILMN_1701914 | CD274        | 1.29  | 2.64E-17 | 1.38  | 1.21  | 0.17  | 0.2931 |
| ILMN_1769566 | ATG3         | 0.61  | 1.81E-09 | 0.68  | 0.54  | 0.15  | 0.2933 |
| ILMN_1656676 | ZYG11B       | -0.90 | 8.11E-17 | -0.85 | -0.96 | 0.10  | 0.2945 |
| ILMN_1667966 | C1orf24      | 0.83  | 7.84E-08 | 0.93  | 0.72  | 0.21  | 0.2948 |
| ILMN_1816244 |              | -0.64 | 4.05E-08 | -0.70 | -0.59 | -0.11 | 0.2949 |
| ILMN_1807042 | MARCKS       | 1.20  | 7.33E-05 | 1.32  | 1.09  | 0.23  | 0.2951 |
| ILMN_2170949 | SNX10        | 0.81  | 2.37E-07 | 0.90  | 0.71  | 0.19  | 0.2956 |
| ILMN_1778136 | ZMYND15      | 0.98  | 1.92E-09 | 1.08  | 0.87  | 0.21  | 0.2964 |
| ILMN_1651819 | GALNT11      | -0.69 | 1.51E-12 | -0.76 | -0.62 | -0.13 | 0.2964 |
| ILMN_1708375 | IRF1         | 1.54  | 1.73E-14 | 1.67  | 1.42  | 0.25  | 0.2966 |
| ILMN_1715715 | CEBPA        | -1.35 | 7.54E-13 | -1.46 | -1.24 | -0.22 | 0.2973 |
| ILMN_1765851 | TRADD        | 0.64  | 9.23E-11 | 0.71  | 0.56  | 0.15  | 0.2980 |
| ILMN_1753472 | SUMF1        | -0.89 | 2.71E-11 | -0.96 | -0.81 | -0.16 | 0.2984 |
| ILMN_2067656 | CCND2        | -0.93 | 3.81E-04 | -1.05 | -0.82 | -0.23 | 0.2994 |
| ILMN_1755658 | ABI3         | 0.65  | 1.82E-03 | 0.72  | 0.58  | 0.14  | 0.3000 |
| ILMN_1675674 | UBE4B        | -0.89 | 1.15E-13 | -0.97 | -0.81 | -0.17 | 0.3001 |
| ILMN_1680246 | MAT2B        | 0.91  | 5.64E-16 | 0.98  | 0.84  | 0.14  | 0.3004 |
| ILMN_1718303 | PVRL2        | 0.88  | 7.91E-11 | 0.98  | 0.79  | 0.18  | 0.3014 |
| ILMN_1773245 | CCL3L1       | 1.55  | 1.76E-06 | 1.39  | 1.71  | -0.32 | 0.3033 |
| ILMN_2405521 | MTHFD2       | 0.77  | 2.14E-11 | 0.83  | 0.72  | 0.11  | 0.3033 |
| ILMN_2186806 | HLA-F        | 0.96  | 1.26E-09 | 1.04  | 0.87  | 0.17  | 0.3047 |
| ILMN_1812618 | ARAP3        | -0.63 | 2.94E-06 | -0.70 | -0.56 | -0.13 | 0.3074 |
| ILMN_1672662 | SLC20A1      | -0.80 | 1.57E-08 | -0.89 | -0.70 | -0.19 | 0.3079 |
| ILMN_1794875 | AGPAT9       | -1.13 | 5.29E-09 | -1.25 | -1.01 | -0.24 | 0.3080 |
| ILMN_1774287 | CFB          | 1.76  | 8.41E-10 | 1.95  | 1.58  | 0.37  | 0.3088 |
| ILMN_1689578 | TLR3         | 0.93  | 2.79E-10 | 1.02  | 0.83  | 0.19  | 0.3091 |
| ILMN_2199439 | CA2          | -0.59 | 7.74E-04 | -0.71 | -0.48 | -0.23 | 0.3097 |
| ILMN_1702787 | SEMA4A       | 1.45  | 1.13E-05 | 1.58  | 1.32  | 0.26  | 0.3105 |
| ILMN_1676984 | DDIT3        | 0.73  | 3.84E-09 | 0.80  | 0.67  | 0.14  | 0.3108 |
| ILMN_3231944 | LOC100130516 | 0.64  | 4.37E-07 | 0.72  | 0.56  | 0.16  | 0.3113 |
| ILMN_1767475 | CERK         | -1.25 | 7.51E-12 | -1.34 | -1.16 | -0.18 | 0.3123 |

|              |              |       |          |       |       |       |        |
|--------------|--------------|-------|----------|-------|-------|-------|--------|
| ILMN_1713285 | NAPA         | 0.63  | 4.08E-13 | 0.69  | 0.57  | 0.12  | 0.3128 |
| ILMN_1708721 | RABGAP1L     | 1.57  | 6.66E-13 | 1.70  | 1.45  | 0.26  | 0.3151 |
| ILMN_2316386 | GPBAR1       | 1.18  | 1.12E-05 | 1.34  | 1.02  | 0.33  | 0.3166 |
| ILMN_1678833 | CCR1         | 0.60  | 6.31E-04 | 0.53  | 0.67  | -0.14 | 0.3170 |
| ILMN_1678422 | DHX58        | 2.06  | 4.44E-17 | 2.17  | 1.94  | 0.23  | 0.3174 |
| ILMN_1671509 | CCL3         | 1.59  | 8.34E-10 | 1.45  | 1.72  | -0.27 | 0.3175 |
| ILMN_2079803 | LSM14A       | -0.64 | 2.76E-09 | -0.68 | -0.59 | -0.09 | 0.3176 |
| ILMN_2042595 | PCGM1        | -0.83 | 5.10E-11 | -0.88 | -0.79 | -0.10 | 0.3186 |
| ILMN_2324157 | UBA3         | 0.66  | 6.07E-14 | 0.71  | 0.61  | 0.10  | 0.3191 |
| ILMN_1789830 | CFLAR        | 0.95  | 4.76E-13 | 1.04  | 0.86  | 0.18  | 0.3210 |
| ILMN_1659990 | C7orf68      | -0.82 | 1.76E-09 | -0.89 | -0.75 | -0.14 | 0.3223 |
| ILMN_1796146 | EIF4E3       | 0.78  | 1.40E-08 | 0.87  | 0.70  | 0.17  | 0.3238 |
| ILMN_1716276 | CCL4L2       | 2.08  | 9.66E-10 | 2.25  | 1.90  | 0.36  | 0.3246 |
| ILMN_2318725 | EEF1B2       | -0.83 | 1.93E-12 | -0.91 | -0.76 | -0.15 | 0.3249 |
| ILMN_2369221 | IL15         | 0.98  | 7.98E-15 | 1.05  | 0.90  | 0.15  | 0.3250 |
| ILMN_1708743 | NT5DC2       | -0.73 | 1.72E-09 | -0.80 | -0.66 | -0.14 | 0.3251 |
| ILMN_1782729 | CLECL1       | 0.59  | 1.51E-03 | 0.65  | 0.53  | 0.12  | 0.3254 |
| ILMN_2103107 | ADAMDEC1     | 0.89  | 1.32E-02 | 1.01  | 0.78  | 0.23  | 0.3258 |
| ILMN_1783702 | MORC3        | 0.64  | 2.51E-15 | 0.69  | 0.59  | 0.10  | 0.3261 |
| ILMN_1692177 | TSC22D1      | 1.33  | 5.88E-13 | 1.44  | 1.22  | 0.22  | 0.3264 |
| ILMN_1724230 | LOC642236    | 0.59  | 9.46E-08 | 0.65  | 0.52  | 0.13  | 0.3266 |
| ILMN_1673352 | IFITM2       | 3.77  | 1.09E-16 | 3.92  | 3.62  | 0.30  | 0.3291 |
| ILMN_1696419 | STOM         | 1.88  | 6.23E-17 | 1.98  | 1.77  | 0.21  | 0.3301 |
| ILMN_1745397 | OAS3         | 2.83  | 1.78E-21 | 2.93  | 2.72  | 0.20  | 0.3314 |
| ILMN_1721605 | SMYD2        | 0.67  | 7.34E-10 | 0.74  | 0.60  | 0.14  | 0.3320 |
| ILMN_1803811 | TRIB1        | -0.95 | 5.89E-07 | -1.05 | -0.86 | -0.19 | 0.3320 |
| ILMN_2181445 | BCL2L13      | 1.03  | 2.15E-12 | 1.11  | 0.94  | 0.17  | 0.3321 |
| ILMN_3202673 | LOC100131196 | -0.62 | 3.00E-09 | -0.68 | -0.55 | -0.14 | 0.3324 |
| ILMN_1676393 | ATP5G1       | -0.71 | 2.50E-10 | -0.78 | -0.64 | -0.14 | 0.3348 |
| ILMN_3281599 | LOC642741    | -0.71 | 1.86E-10 | -0.79 | -0.64 | -0.14 | 0.3351 |
| ILMN_1710726 | APOBEC3F     | 1.17  | 1.17E-10 | 1.27  | 1.07  | 0.21  | 0.3354 |
| ILMN_1669523 | FOS          | -0.72 | 1.35E-05 | -0.82 | -0.62 | -0.20 | 0.3355 |
| ILMN_2381899 | OPTN         | 0.89  | 3.89E-07 | 0.97  | 0.80  | 0.17  | 0.3357 |
| ILMN_2104830 | ACP2         | 0.82  | 1.15E-08 | 0.90  | 0.73  | 0.17  | 0.3374 |
| ILMN_1807423 | IGF2BP3      | 1.62  | 8.33E-12 | 1.75  | 1.50  | 0.24  | 0.3382 |
| ILMN_1715863 | MLKL         | 0.97  | 1.68E-16 | 0.92  | 1.02  | -0.10 | 0.3383 |
| ILMN_2092333 | GPR141       | 0.68  | 9.41E-07 | 0.77  | 0.60  | 0.17  | 0.3387 |
| ILMN_2202915 | FAR2         | 0.82  | 1.00E-09 | 0.90  | 0.75  | 0.15  | 0.3401 |
| ILMN_1670000 | DCAF6        | -0.65 | 4.62E-12 | -0.71 | -0.60 | -0.11 | 0.3421 |
| ILMN_2388975 | CERK         | -0.87 | 1.72E-09 | -0.94 | -0.80 | -0.13 | 0.3421 |
| ILMN_2061043 | CD48         | 0.76  | 4.19E-09 | 0.84  | 0.67  | 0.17  | 0.3421 |
| ILMN_1695316 | SLC39A8      | -0.59 | 3.33E-04 | -0.69 | -0.50 | -0.19 | 0.3422 |
| ILMN_2169490 | TDRD9        | -0.76 | 6.32E-08 | -0.83 | -0.68 | -0.16 | 0.3426 |
| ILMN_1798454 | MAD2L1BP     | 0.69  | 3.77E-12 | 0.65  | 0.74  | -0.10 | 0.3435 |
| ILMN_1656361 | LOC201175    | 0.68  | 8.35E-09 | 0.62  | 0.74  | -0.13 | 0.3449 |
| ILMN_1756862 | APOL3        | 2.71  | 3.71E-13 | 2.91  | 2.51  | 0.39  | 0.3458 |
| ILMN_2373285 | MSR1         | 1.12  | 3.01E-11 | 1.19  | 1.04  | 0.15  | 0.3463 |
| ILMN_1669703 | TNK2         | 0.86  | 1.58E-09 | 0.94  | 0.78  | 0.16  | 0.3472 |
| ILMN_1724181 | IL15         | 1.41  | 1.14E-14 | 1.52  | 1.31  | 0.21  | 0.3477 |
| ILMN_1761072 | LOC653631    | 1.03  | 2.75E-18 | 1.09  | 0.97  | 0.12  | 0.3485 |
| ILMN_1661109 | ATF3         | 1.42  | 9.44E-05 | 1.57  | 1.27  | 0.31  | 0.3495 |
| ILMN_1666376 | TRIM56       | 0.69  | 1.14E-13 | 0.63  | 0.75  | -0.12 | 0.3496 |
| ILMN_1707695 | IFIT1        | 5.93  | 2.40E-29 | 6.03  | 5.84  | 0.20  | 0.3505 |
| ILMN_1747355 | CCL3L1       | 1.64  | 6.58E-11 | 1.52  | 1.75  | -0.23 | 0.3512 |
| ILMN_2233783 | CD38         | 2.62  | 4.01E-10 | 2.88  | 2.37  | 0.51  | 0.3525 |
| ILMN_2173611 | MT1E         | -1.16 | 2.20E-06 | -1.27 | -1.05 | -0.23 | 0.3529 |
| ILMN_1798957 | C12orf47     | -0.65 | 4.46E-13 | -0.69 | -0.60 | -0.09 | 0.3529 |
| ILMN_1697817 | PANX1        | 0.83  | 3.92E-12 | 0.90  | 0.76  | 0.14  | 0.3534 |
| ILMN_3223126 | TYMP         | 1.78  | 1.40E-16 | 1.88  | 1.69  | 0.18  | 0.3535 |
| ILMN_2049642 | RPA1         | -0.66 | 4.87E-10 | -0.71 | -0.61 | -0.10 | 0.3537 |
| ILMN_2066858 | TNFSF13B     | 2.79  | 6.66E-18 | 2.92  | 2.66  | 0.26  | 0.3550 |
| ILMN_1665865 | IGFBP4       | 0.93  | 1.20E-03 | 1.05  | 0.81  | 0.23  | 0.3560 |
| ILMN_1773154 | NFKBIA       | 0.81  | 3.33E-05 | 0.91  | 0.71  | 0.20  | 0.3566 |
| ILMN_1725338 | CLDN23       | 0.67  | 1.50E-03 | 0.75  | 0.59  | 0.16  | 0.3568 |
| ILMN_1689088 | COLEC12      | -1.27 | 3.98E-05 | -1.13 | -1.40 | 0.27  | 0.3586 |
| ILMN_1682567 | CCDC106      | -0.61 | 1.35E-10 | -0.67 | -0.55 | -0.11 | 0.3597 |
| ILMN_1715809 | OGFRL1       | 0.87  | 9.35E-12 | 0.93  | 0.80  | 0.13  | 0.3614 |
| ILMN_2218856 | CCL3L1       | 1.52  | 2.73E-11 | 1.42  | 1.62  | -0.21 | 0.3618 |
| ILMN_1694587 | EEF1B2       | -0.74 | 1.30E-09 | -0.83 | -0.66 | -0.16 | 0.3619 |
| ILMN_1746819 | C5           | 1.10  | 1.36E-07 | 1.24  | 0.97  | 0.27  | 0.3635 |
| ILMN_1706531 | ABCC5        | -0.62 | 1.41E-08 | -0.68 | -0.57 | -0.12 | 0.3642 |
| ILMN_2352921 | BPGM         | 0.74  | 2.25E-13 | 0.79  | 0.68  | 0.11  | 0.3647 |
| ILMN_1670134 | FADS1        | -0.76 | 9.57E-07 | -0.83 | -0.69 | -0.15 | 0.3649 |
| ILMN_3305169 | LOC728809    | 0.64  | 3.66E-06 | 0.73  | 0.54  | 0.18  | 0.3661 |
| ILMN_1663347 | OTOF         | 1.35  | 7.58E-10 | 1.48  | 1.21  | 0.26  | 0.3665 |
| ILMN_1662795 | CA2          | -0.64 | 5.64E-04 | -0.73 | -0.54 | -0.20 | 0.3685 |

|              |              |       |          |       |       |       |        |
|--------------|--------------|-------|----------|-------|-------|-------|--------|
| ILMN_1696654 | IFIT5        | 0.73  | 4.27E-17 | 0.68  | 0.77  | -0.09 | 0.3687 |
| ILMN_1716909 | ADAMDEC1     | 0.99  | 1.07E-03 | 1.09  | 0.90  | 0.19  | 0.3689 |
| ILMN_2296950 | APOBEC3F     | 1.29  | 5.90E-12 | 1.38  | 1.21  | 0.18  | 0.3692 |
| ILMN_1679731 | SLC15A4      | 0.77  | 1.26E-12 | 0.83  | 0.71  | 0.12  | 0.3694 |
| ILMN_1753758 | IL27         | 1.62  | 2.14E-13 | 1.73  | 1.50  | 0.23  | 0.3700 |
| ILMN_2226955 | VOPP1        | 0.64  | 1.66E-12 | 0.69  | 0.59  | 0.11  | 0.3715 |
| ILMN_2312719 | EXOSC9       | 0.67  | 1.77E-07 | 0.75  | 0.59  | 0.16  | 0.3719 |
| ILMN_2053103 | SLC40A1      | -0.76 | 2.36E-02 | -0.65 | -0.87 | 0.22  | 0.3725 |
| ILMN_1811921 | CSRP1        | -0.87 | 1.55E-13 | -0.94 | -0.79 | -0.15 | 0.3731 |
| ILMN_1658247 | OAS1         | 2.19  | 2.35E-07 | 2.35  | 2.04  | 0.31  | 0.3737 |
| ILMN_2208158 | GTF2IP1      | 0.66  | 2.34E-12 | 0.71  | 0.61  | 0.10  | 0.3741 |
| ILMN_1791759 | CXCL10       | 6.40  | 2.39E-21 | 6.62  | 6.18  | 0.44  | 0.3760 |
| ILMN_1741632 | RAB3IL1      | -0.73 | 4.80E-05 | -0.81 | -0.66 | -0.15 | 0.3761 |
| ILMN_1703327 | PSTPIP1      | -0.61 | 1.24E-06 | -0.67 | -0.55 | -0.12 | 0.3764 |
| ILMN_1679476 | GART         | 0.59  | 1.50E-09 | 0.64  | 0.54  | 0.11  | 0.3764 |
| ILMN_3242900 | HIST2H2AA4   | 1.98  | 6.90E-13 | 2.12  | 1.85  | 0.27  | 0.3766 |
| ILMN_1766184 | LOC654346    | 0.62  | 1.90E-10 | 0.57  | 0.67  | -0.09 | 0.3774 |
| ILMN_1793831 | TRADD        | 0.65  | 1.24E-12 | 0.70  | 0.60  | 0.11  | 0.3791 |
| ILMN_1813338 | LAG3         | 2.17  | 1.90E-10 | 2.36  | 1.98  | 0.38  | 0.3806 |
| ILMN_1789074 | HSPA1A       | 0.69  | 3.99E-07 | 0.79  | 0.60  | 0.19  | 0.3809 |
| ILMN_3231550 | LOC100131718 | 0.70  | 1.15E-08 | 0.77  | 0.62  | 0.15  | 0.3820 |
| ILMN_1788802 | GCH1         | 1.05  | 5.64E-12 | 1.13  | 0.97  | 0.17  | 0.3834 |
| ILMN_1810069 | CCNYL1       | 1.01  | 2.32E-17 | 1.06  | 0.95  | 0.11  | 0.3837 |
| ILMN_2231928 | MX2          | 3.88  | 5.29E-25 | 3.97  | 3.80  | 0.17  | 0.3855 |
| ILMN_1723035 | OLR1         | -0.63 | 4.48E-03 | -0.72 | -0.54 | -0.17 | 0.3856 |
| ILMN_1656670 | HLA-G        | 0.74  | 7.92E-10 | 0.81  | 0.68  | 0.12  | 0.3858 |
| ILMN_2188722 | GLS          | -0.80 | 5.92E-12 | -0.86 | -0.74 | -0.12 | 0.3864 |
| ILMN_1662358 | MX1          | 4.08  | 5.14E-25 | 4.19  | 3.96  | 0.23  | 0.3865 |
| ILMN_1674811 | OASL         | 4.44  | 2.07E-23 | 4.58  | 4.29  | 0.29  | 0.3872 |
| ILMN_1699574 | NRP1         | -0.91 | 4.04E-06 | -0.99 | -0.82 | -0.17 | 0.3879 |
| ILMN_1691410 | BAMBI        | 0.71  | 7.64E-05 | 0.76  | 0.66  | 0.11  | 0.3888 |
| ILMN_1660579 | CRLF3        | 0.85  | 1.45E-18 | 0.90  | 0.80  | 0.09  | 0.3888 |
| ILMN_1805737 | PFKP         | 0.65  | 1.04E-06 | 0.71  | 0.60  | 0.11  | 0.3897 |
| ILMN_1751941 | LOC728772    | 0.82  | 7.72E-09 | 0.88  | 0.76  | 0.12  | 0.3898 |
| ILMN_2162972 | LYZ          | -0.64 | 9.07E-05 | -0.69 | -0.58 | -0.11 | 0.3899 |
| ILMN_1810852 | LAMC1        | -0.74 | 4.83E-09 | -0.79 | -0.68 | -0.11 | 0.3901 |
| ILMN_2128428 | DAB2         | -1.20 | 2.86E-10 | -1.29 | -1.11 | -0.18 | 0.3907 |
| ILMN_1750321 | LBA1         | 1.08  | 6.44E-10 | 1.19  | 0.98  | 0.20  | 0.3931 |
| ILMN_1774077 | GBP2         | 1.62  | 6.86E-15 | 1.71  | 1.53  | 0.18  | 0.3964 |
| ILMN_1713124 | AKR1C3       | -0.68 | 1.74E-04 | -0.76 | -0.61 | -0.15 | 0.3966 |
| ILMN_2312340 | LILRB2       | 0.72  | 1.32E-03 | 0.78  | 0.66  | 0.12  | 0.3973 |
| ILMN_1768973 | HIST2H2AC    | 1.72  | 4.10E-11 | 1.85  | 1.58  | 0.28  | 0.3990 |
| ILMN_3245413 | DENND5A      | 0.71  | 5.03E-08 | 0.77  | 0.65  | 0.12  | 0.3990 |
| ILMN_1708101 | LMNB2        | -0.60 | 9.09E-15 | -0.56 | -0.63 | 0.08  | 0.3993 |
| ILMN_2343010 | BOLA3        | -0.81 | 1.78E-11 | -0.85 | -0.76 | -0.09 | 0.4014 |
| ILMN_2367753 | ATP2B4       | -0.64 | 9.45E-04 | -0.69 | -0.58 | -0.11 | 0.4018 |
| ILMN_1805750 | IFITM3       | 4.19  | 7.38E-18 | 4.33  | 4.05  | 0.27  | 0.4020 |
| ILMN_2049766 | NFE2L3       | 1.69  | 2.69E-11 | 1.80  | 1.57  | 0.23  | 0.4020 |
| ILMN_2103761 | TLE4         | 0.90  | 3.56E-09 | 0.97  | 0.82  | 0.15  | 0.4039 |
| ILMN_1721713 | EXOSC9       | 0.70  | 3.95E-08 | 0.78  | 0.63  | 0.15  | 0.4054 |
| ILMN_1720771 | STX11        | 1.36  | 4.04E-14 | 1.46  | 1.27  | 0.20  | 0.4055 |
| ILMN_2333774 | TAGAP        | 0.75  | 2.69E-14 | 0.80  | 0.70  | 0.10  | 0.4066 |
| ILMN_1814194 | TCF4         | 0.72  | 2.03E-06 | 0.77  | 0.66  | 0.12  | 0.4067 |
| ILMN_2300970 | ETFB         | -0.60 | 2.31E-14 | -0.64 | -0.55 | -0.09 | 0.4076 |
| ILMN_1762713 | C19orf59     | -0.66 | 6.81E-06 | -0.74 | -0.59 | -0.16 | 0.4080 |
| ILMN_1724837 | ZC3HAV1      | 1.41  | 1.61E-18 | 1.47  | 1.34  | 0.13  | 0.4088 |
| ILMN_2144426 | HIST2H2AA3   | 1.67  | 2.00E-10 | 1.81  | 1.53  | 0.28  | 0.4091 |
| ILMN_3256478 | LOC100129034 | -0.80 | 7.59E-10 | -0.85 | -0.74 | -0.11 | 0.4099 |
| ILMN_1671250 | CLIC4        | 0.81  | 1.91E-08 | 0.87  | 0.76  | 0.11  | 0.4105 |
| ILMN_1656057 | PLAU         | -1.25 | 1.37E-06 | -1.38 | -1.12 | -0.25 | 0.4112 |
| ILMN_3310491 | MIR1978      | 0.64  | 1.84E-04 | 0.58  | 0.69  | -0.11 | 0.4118 |
| ILMN_1783771 | UBE2Z        | 0.93  | 9.12E-12 | 1.00  | 0.85  | 0.15  | 0.4123 |
| ILMN_1658235 | LOC647135    | 0.61  | 5.15E-11 | 0.67  | 0.56  | 0.11  | 0.4124 |
| ILMN_1672728 | KCTD5        | -0.65 | 7.72E-13 | -0.69 | -0.61 | -0.09 | 0.4128 |
| ILMN_1713058 | PSTPIP2      | 0.59  | 1.73E-04 | 0.67  | 0.52  | 0.16  | 0.4130 |
| ILMN_1697742 | C3orf38      | 1.05  | 2.84E-16 | 1.11  | 1.00  | 0.12  | 0.4131 |
| ILMN_3249578 | LOC100132394 | -1.74 | 5.24E-16 | -1.81 | -1.68 | -0.13 | 0.4155 |
| ILMN_1765332 | TIMM10       | -0.72 | 2.81E-05 | -0.78 | -0.66 | -0.12 | 0.4155 |
| ILMN_2413318 | C15orf57     | 0.77  | 9.35E-12 | 0.82  | 0.73  | 0.09  | 0.4157 |
| ILMN_1721411 | PARP10       | 1.29  | 3.68E-19 | 1.35  | 1.22  | 0.12  | 0.4164 |
| ILMN_2370573 | XAF1         | 1.66  | 2.95E-14 | 1.75  | 1.58  | 0.17  | 0.4172 |
| ILMN_3289090 | LOC728059    | 0.71  | 1.27E-13 | 0.76  | 0.66  | 0.10  | 0.4176 |
| ILMN_1699856 | RALGDS       | -0.60 | 5.22E-08 | -0.64 | -0.55 | -0.10 | 0.4192 |
| ILMN_1680996 | ALOX5        | -1.21 | 2.89E-05 | -1.33 | -1.09 | -0.24 | 0.4198 |
| ILMN_1674063 | OAS2         | 3.49  | 7.03E-26 | 3.58  | 3.41  | 0.17  | 0.4213 |
| ILMN_1813561 | SCIN         | 1.53  | 4.07E-09 | 1.65  | 1.41  | 0.24  | 0.4215 |

|              |              |       |          |       |       |       |        |
|--------------|--------------|-------|----------|-------|-------|-------|--------|
| ILMN_1729749 | HERC5        | 4.49  | 3.28E-26 | 4.61  | 4.38  | 0.23  | 0.4216 |
| ILMN_2406313 | RBCK1        | 0.94  | 4.09E-13 | 1.00  | 0.89  | 0.11  | 0.4217 |
| ILMN_1669831 | C6orf192     | 0.60  | 3.53E-03 | 0.66  | 0.54  | 0.12  | 0.4223 |
| ILMN_1760062 | IFI44        | 3.06  | 1.48E-23 | 3.00  | 3.12  | -0.12 | 0.4224 |
| ILMN_1703946 | ADORA2B      | -0.76 | 1.91E-03 | -0.85 | -0.67 | -0.18 | 0.4228 |
| ILMN_1687315 | RXRA         | -0.90 | 4.66E-11 | -0.97 | -0.83 | -0.13 | 0.4250 |
| ILMN_1755411 | RBMS2        | 1.12  | 4.95E-09 | 1.21  | 1.02  | 0.18  | 0.4260 |
| ILMN_2106902 | CHES1        | -0.75 | 1.46E-06 | -0.70 | -0.80 | 0.10  | 0.4261 |
| ILMN_1682081 | RNF19B       | 1.02  | 1.03E-06 | 1.11  | 0.92  | 0.19  | 0.4262 |
| ILMN_1691927 | BTBD1        | 0.73  | 4.53E-13 | 0.77  | 0.68  | 0.09  | 0.4262 |
| ILMN_3201480 | LOC643358    | -0.63 | 5.27E-12 | -0.67 | -0.59 | -0.08 | 0.4267 |
| ILMN_1709333 | OAS2         | 2.07  | 4.31E-22 | 2.15  | 2.00  | 0.15  | 0.4277 |
| ILMN_1819608 |              | -0.94 | 2.85E-10 | -1.02 | -0.86 | -0.16 | 0.4277 |
| ILMN_2125747 | LOC606724    | -0.79 | 1.44E-05 | -0.86 | -0.71 | -0.15 | 0.4281 |
| ILMN_1781373 | IFIH1        | 2.95  | 7.89E-22 | 3.06  | 2.84  | 0.22  | 0.4289 |
| ILMN_1737857 | GTF2B        | 0.77  | 2.30E-14 | 0.72  | 0.81  | -0.09 | 0.4294 |
| ILMN_1725666 | GTF2H3       | 0.65  | 1.82E-10 | 0.71  | 0.59  | 0.11  | 0.4307 |
| ILMN_3246953 | FTSJD2       | 1.26  | 1.25E-15 | 1.33  | 1.19  | 0.13  | 0.4317 |
| ILMN_1793203 | SMCR7L       | -0.60 | 2.62E-09 | -0.65 | -0.54 | -0.11 | 0.4329 |
| ILMN_2150352 | CBWD5        | 0.70  | 2.54E-13 | 0.66  | 0.74  | -0.08 | 0.4331 |
| ILMN_1659801 | ATP6V1C1     | -0.74 | 1.47E-10 | -0.80 | -0.67 | -0.13 | 0.4332 |
| ILMN_1740572 | TCN2         | 0.66  | 3.24E-04 | 0.72  | 0.60  | 0.12  | 0.4332 |
| ILMN_3236239 | LOC100129550 | -0.69 | 8.93E-11 | -0.64 | -0.74 | 0.10  | 0.4333 |
| ILMN_1778599 | SP140        | 1.58  | 5.34E-13 | 1.68  | 1.48  | 0.20  | 0.4334 |
| ILMN_2188333 | CD69         | 0.90  | 4.20E-10 | 0.98  | 0.83  | 0.15  | 0.4340 |
| ILMN_2320853 | UBE2D3       | 0.60  | 4.09E-15 | 0.63  | 0.56  | 0.08  | 0.4350 |
| ILMN_1673638 | RPS3A        | -0.69 | 4.24E-13 | -0.73 | -0.64 | -0.09 | 0.4370 |
| ILMN_1734544 | WTAP         | 0.59  | 1.06E-07 | 0.65  | 0.53  | 0.12  | 0.4380 |
| ILMN_1690487 | PCM1         | -0.84 | 3.60E-12 | -0.88 | -0.79 | -0.09 | 0.4390 |
| ILMN_2311826 | USP6NL       | 0.70  | 8.74E-10 | 0.76  | 0.64  | 0.12  | 0.4391 |
| ILMN_1713156 | MSL3L1       | 0.67  | 7.87E-14 | 0.72  | 0.62  | 0.09  | 0.4393 |
| ILMN_1730433 | CD2AP        | 0.66  | 2.07E-12 | 0.71  | 0.62  | 0.10  | 0.4403 |
| ILMN_2412172 | APOBEC3F     | 1.25  | 5.72E-13 | 1.33  | 1.18  | 0.15  | 0.4407 |
| ILMN_2328666 | CD83         | 0.61  | 3.32E-05 | 0.67  | 0.55  | 0.11  | 0.4423 |
| ILMN_1762972 | CHD9         | -0.80 | 2.13E-11 | -0.85 | -0.76 | -0.09 | 0.4431 |
| ILMN_1791912 | SIDT2        | 0.73  | 3.05E-06 | 0.80  | 0.66  | 0.15  | 0.4452 |
| ILMN_1727479 | TPRG1L       | -0.72 | 4.98E-14 | -0.77 | -0.68 | -0.09 | 0.4461 |
| ILMN_2273103 | ELK4         | 0.60  | 1.50E-09 | 0.65  | 0.55  | 0.10  | 0.4472 |
| ILMN_1773968 | SERBP1       | -0.81 | 2.34E-12 | -0.86 | -0.75 | -0.11 | 0.4483 |
| ILMN_1684183 | RAD9A        | 0.66  | 4.32E-14 | 0.70  | 0.61  | 0.09  | 0.4494 |
| ILMN_1690105 | STAT1        | 3.46  | 2.43E-24 | 3.55  | 3.36  | 0.19  | 0.4497 |
| ILMN_1737498 | MLKL         | 0.97  | 6.52E-16 | 0.93  | 1.01  | -0.08 | 0.4511 |
| ILMN_1665291 | NUB1         | 1.57  | 8.91E-14 | 1.67  | 1.48  | 0.19  | 0.4512 |
| ILMN_1781155 | LYN          | 0.90  | 1.24E-06 | 0.98  | 0.83  | 0.15  | 0.4513 |
| ILMN_1683415 | CAMK2D       | 0.66  | 3.28E-08 | 0.71  | 0.61  | 0.10  | 0.4513 |
| ILMN_3246805 | LOC100134364 | -1.54 | 8.80E-16 | -1.60 | -1.49 | -0.11 | 0.4519 |
| ILMN_1688464 | MAP6D1       | -0.61 | 4.25E-10 | -0.65 | -0.57 | -0.08 | 0.4526 |
| ILMN_1782938 | SLC16A10     | -0.95 | 1.12E-07 | -1.04 | -0.86 | -0.18 | 0.4535 |
| ILMN_1696028 | ETNK1        | 0.69  | 2.46E-09 | 0.74  | 0.65  | 0.09  | 0.4541 |
| ILMN_3244395 | LOC728877    | 0.85  | 5.88E-13 | 0.80  | 0.90  | -0.10 | 0.4551 |
| ILMN_1654639 | HERC6        | 2.42  | 3.42E-22 | 2.49  | 2.35  | 0.14  | 0.4553 |
| ILMN_1673030 | CMKLR1       | 0.69  | 5.58E-04 | 0.76  | 0.62  | 0.14  | 0.4553 |
| ILMN_3244065 | C9orf69      | -0.65 | 4.56E-14 | -0.70 | -0.61 | -0.08 | 0.4560 |
| ILMN_1729123 | PPP2R4       | 0.65  | 4.17E-09 | 0.71  | 0.60  | 0.11  | 0.4566 |
| ILMN_1903406 | LOC645634    | 0.69  | 1.93E-10 | 0.75  | 0.64  | 0.11  | 0.4569 |
| ILMN_2148785 | GBP1         | 3.25  | 1.58E-20 | 3.37  | 3.13  | 0.23  | 0.4572 |
| ILMN_1765578 | TIPARP       | 0.68  | 1.55E-11 | 0.72  | 0.64  | 0.08  | 0.4609 |
| ILMN_1777998 | ARHGAP25     | 0.71  | 4.14E-11 | 0.76  | 0.67  | 0.09  | 0.4617 |
| ILMN_1814737 | LNPEP        | 0.86  | 7.88E-10 | 0.92  | 0.79  | 0.13  | 0.4641 |
| ILMN_1697864 | CXorf38      | 0.63  | 2.31E-11 | 0.67  | 0.59  | 0.08  | 0.4657 |
| ILMN_2393296 | GK           | 0.73  | 3.91E-10 | 0.79  | 0.67  | 0.12  | 0.4664 |
| ILMN_1711702 | CLEC2D       | -0.96 | 6.58E-08 | -1.03 | -0.88 | -0.15 | 0.4672 |
| ILMN_1790973 | CDS2         | 0.65  | 6.73E-10 | 0.70  | 0.60  | 0.10  | 0.4673 |
| ILMN_2404688 | NUPR1        | 2.56  | 1.07E-09 | 2.72  | 2.41  | 0.32  | 0.4678 |
| ILMN_2335813 | GCH1         | 1.84  | 1.03E-12 | 1.96  | 1.73  | 0.23  | 0.4689 |
| ILMN_3295494 | LOC389386    | 2.33  | 7.37E-24 | 2.40  | 2.27  | 0.13  | 0.4692 |
| ILMN_1701613 | RARRES3      | 1.89  | 2.88E-11 | 2.01  | 1.76  | 0.25  | 0.4702 |
| ILMN_1811588 | PML          | 0.68  | 5.29E-15 | 0.72  | 0.64  | 0.08  | 0.4702 |
| ILMN_1727271 | WARS         | 1.05  | 1.23E-07 | 1.12  | 0.98  | 0.15  | 0.4704 |
| ILMN_1788017 | HSH2D        | 1.12  | 1.93E-10 | 1.20  | 1.04  | 0.17  | 0.4720 |
| ILMN_1808939 | RPS6         | -0.62 | 3.05E-07 | -0.68 | -0.55 | -0.12 | 0.4730 |
| ILMN_1811110 | TDRD9        | -0.67 | 3.18E-06 | -0.74 | -0.61 | -0.13 | 0.4742 |
| ILMN_1767006 | PSMB8        | 1.18  | 5.64E-21 | 1.22  | 1.14  | 0.08  | 0.4753 |
| ILMN_1653001 | CABLES1      | -0.66 | 1.55E-07 | -0.71 | -0.62 | -0.09 | 0.4766 |
| ILMN_2405018 | PPP1CB       | -0.77 | 2.23E-12 | -0.81 | -0.73 | -0.07 | 0.4768 |
| ILMN_1768505 | IL13RA1      | -0.62 | 2.70E-06 | -0.59 | -0.66 | 0.08  | 0.4771 |

|              |            |       |          |       |       |       |        |
|--------------|------------|-------|----------|-------|-------|-------|--------|
| ILMN_1755910 | LOC648366  | 0.64  | 1.10E-08 | 0.70  | 0.58  | 0.11  | 0.4772 |
| ILMN_2087656 | SLCO2B1    | -0.80 | 1.51E-04 | -0.86 | -0.75 | -0.11 | 0.4778 |
| ILMN_1738704 | TRIM26     | 1.11  | 2.20E-14 | 1.16  | 1.05  | 0.11  | 0.4796 |
| ILMN_1797875 | ALOX5AP    | -1.09 | 8.44E-05 | -1.21 | -0.96 | -0.25 | 0.4800 |
| ILMN_2328029 | EXT2       | 0.65  | 2.86E-10 | 0.69  | 0.62  | 0.07  | 0.4802 |
| ILMN_2105573 | CCL3L3     | 1.54  | 1.21E-10 | 1.45  | 1.63  | -0.18 | 0.4803 |
| ILMN_1777260 | ATXN7L1    | 0.85  | 1.77E-09 | 0.92  | 0.79  | 0.13  | 0.4810 |
| ILMN_1680782 | PATL1      | 0.61  | 2.99E-10 | 0.66  | 0.57  | 0.09  | 0.4815 |
| ILMN_1708248 | LILRB1     | 0.81  | 3.14E-09 | 0.87  | 0.75  | 0.12  | 0.4822 |
| ILMN_1761199 | SLCO2B1    | -0.76 | 8.37E-04 | -0.83 | -0.69 | -0.14 | 0.4837 |
| ILMN_1654812 | UNC93B1    | 1.19  | 2.69E-14 | 1.25  | 1.13  | 0.12  | 0.4846 |
| ILMN_1677404 | RAP2A      | -0.72 | 8.88E-12 | -0.77 | -0.67 | -0.09 | 0.4848 |
| ILMN_1745807 | TMEM62     | 1.06  | 7.67E-12 | 1.12  | 0.99  | 0.13  | 0.4863 |
| ILMN_2381197 | RNF19A     | 0.60  | 1.10E-08 | 0.55  | 0.65  | -0.10 | 0.4872 |
| ILMN_1798233 | PSMB9      | 0.75  | 1.37E-10 | 0.80  | 0.71  | 0.10  | 0.4874 |
| ILMN_1731418 | SP110      | 3.09  | 3.94E-28 | 3.14  | 3.03  | 0.11  | 0.4874 |
| ILMN_2289093 | KIAA1618   | 2.33  | 1.46E-19 | 2.40  | 2.25  | 0.15  | 0.4891 |
| ILMN_1671932 | SAMM50     | -0.75 | 2.34E-10 | -0.79 | -0.71 | -0.08 | 0.4891 |
| ILMN_2157099 | CCNA1      | 1.98  | 2.03E-09 | 2.08  | 1.88  | 0.20  | 0.4903 |
| ILMN_2184262 | OAS3       | 0.69  | 4.54E-11 | 0.73  | 0.64  | 0.09  | 0.4913 |
| ILMN_1811264 | C15orf57   | 0.77  | 2.29E-09 | 0.82  | 0.71  | 0.11  | 0.4919 |
| ILMN_1694400 | MSR1       | 0.62  | 3.81E-07 | 0.67  | 0.58  | 0.09  | 0.4929 |
| ILMN_2399363 | CLEC4A     | -0.80 | 1.90E-03 | -0.87 | -0.73 | -0.15 | 0.4933 |
| ILMN_1766514 | LOC650274  | 0.66  | 4.93E-11 | 0.70  | 0.61  | 0.09  | 0.4951 |
| ILMN_1900661 |            | -0.83 | 3.91E-08 | -0.89 | -0.78 | -0.10 | 0.4966 |
| ILMN_3211906 | LOC647030  | -0.73 | 2.17E-12 | -0.78 | -0.68 | -0.10 | 0.4968 |
| ILMN_1659047 | HIST2H2AA3 | 1.88  | 4.03E-11 | 2.00  | 1.75  | 0.25  | 0.4974 |
| ILMN_1769705 | LOC440093  | 0.79  | 6.18E-14 | 0.84  | 0.75  | 0.09  | 0.4975 |
| ILMN_1726565 | PIK3R2     | -0.60 | 7.43E-12 | -0.64 | -0.56 | -0.08 | 0.4980 |
| ILMN_1792885 | CTSC       | 1.44  | 4.07E-05 | 1.34  | 1.54  | -0.20 | 0.4984 |
| ILMN_1815319 | CMTM4      | -0.82 | 5.84E-15 | -0.86 | -0.78 | -0.08 | 0.4988 |
| ILMN_1865764 |            | -1.47 | 5.52E-17 | -1.52 | -1.41 | -0.11 | 0.5013 |
| ILMN_1745374 | IFI35      | 2.66  | 2.94E-21 | 2.74  | 2.58  | 0.15  | 0.5018 |
| ILMN_3242540 | CD163L1    | -0.81 | 2.73E-04 | -0.73 | -0.90 | 0.17  | 0.5039 |
| ILMN_2226304 | ANKRD50    | -0.59 | 8.65E-16 | -0.62 | -0.56 | -0.06 | 0.5056 |
| ILMN_2316778 | ETNK1      | 0.96  | 8.80E-16 | 0.99  | 0.92  | 0.07  | 0.5056 |
| ILMN_1723480 | BST2       | 1.22  | 2.24E-11 | 1.16  | 1.28  | -0.12 | 0.5064 |
| ILMN_1775170 | MT1X       | -2.19 | 7.34E-10 | -2.32 | -2.06 | -0.26 | 0.5085 |
| ILMN_1742230 | BAZ1A      | 0.81  | 1.86E-10 | 0.87  | 0.75  | 0.12  | 0.5091 |
| ILMN_1719906 | HADH       | -0.75 | 3.69E-12 | -0.79 | -0.70 | -0.09 | 0.5113 |
| ILMN_1692168 | UBE2Z      | 1.00  | 2.03E-10 | 1.07  | 0.94  | 0.14  | 0.5135 |
| ILMN_1771800 | PRKCA      | -0.87 | 5.19E-10 | -0.92 | -0.82 | -0.10 | 0.5147 |
| ILMN_1691572 | TST        | -0.60 | 2.93E-10 | -0.64 | -0.56 | -0.08 | 0.5147 |
| ILMN_1812759 | GCH1       | 2.47  | 3.70E-15 | 2.59  | 2.36  | 0.22  | 0.5149 |
| ILMN_1694780 | GCHFR      | -0.66 | 3.26E-04 | -0.71 | -0.61 | -0.10 | 0.5166 |
| ILMN_1783621 | CMPK2      | 2.29  | 2.52E-22 | 2.35  | 2.22  | 0.13  | 0.5173 |
| ILMN_1703108 | UBE2L6     | 2.08  | 1.64E-23 | 2.13  | 2.02  | 0.11  | 0.5176 |
| ILMN_2053527 | PARP9      | 1.89  | 2.06E-20 | 1.93  | 1.84  | 0.10  | 0.5185 |
| ILMN_2067890 | CXCL11     | 2.75  | 1.64E-06 | 3.02  | 2.48  | 0.54  | 0.5195 |
| ILMN_1683120 | UNG        | -0.66 | 6.25E-12 | -0.69 | -0.62 | -0.07 | 0.5221 |
| ILMN_1652082 | ELF4       | 0.67  | 2.44E-11 | 0.71  | 0.63  | 0.08  | 0.5222 |
| ILMN_2154566 | RPL10A     | -0.61 | 7.25E-08 | -0.65 | -0.56 | -0.10 | 0.5226 |
| ILMN_2063925 | CTNBL1     | 0.93  | 4.68E-15 | 0.97  | 0.89  | 0.08  | 0.5227 |
| ILMN_1671054 | HLA-A      | 0.97  | 6.15E-06 | 1.04  | 0.90  | 0.15  | 0.5237 |
| ILMN_1711792 | GPBP1      | 1.10  | 1.34E-16 | 1.15  | 1.05  | 0.10  | 0.5244 |
| ILMN_2140990 | CAMK1      | -0.64 | 8.36E-06 | -0.71 | -0.58 | -0.13 | 0.5256 |
| ILMN_1799208 | CSGALNACT2 | 0.59  | 1.41E-09 | 0.63  | 0.55  | 0.08  | 0.5257 |
| ILMN_1792689 | HIST1H2AC  | 0.60  | 1.94E-06 | 0.65  | 0.55  | 0.10  | 0.5257 |
| ILMN_1760778 | ENG        | -0.72 | 5.02E-08 | -0.77 | -0.67 | -0.09 | 0.5270 |
| ILMN_2194828 | C16orf53   | -0.97 | 1.03E-16 | -1.01 | -0.93 | -0.07 | 0.5282 |
| ILMN_1686388 | LOC644330  | 0.92  | 2.63E-14 | 0.87  | 0.96  | -0.09 | 0.5284 |
| ILMN_2214144 | TWSG1      | -0.76 | 2.85E-06 | -0.71 | -0.80 | 0.08  | 0.5306 |
| ILMN_2357419 | LILRA5     | 0.84  | 4.73E-09 | 0.79  | 0.89  | -0.10 | 0.5321 |
| ILMN_1710434 | TBC1D10C   | -0.71 | 3.38E-06 | -0.75 | -0.67 | -0.08 | 0.5321 |
| ILMN_1845037 |            | 1.24  | 9.04E-18 | 1.28  | 1.19  | 0.09  | 0.5324 |
| ILMN_1777584 | KARS       | 0.63  | 1.32E-12 | 0.59  | 0.66  | -0.07 | 0.5329 |
| ILMN_2055760 | KIAA1715   | -0.80 | 2.84E-13 | -0.84 | -0.75 | -0.09 | 0.5330 |
| ILMN_2388701 | ST3GAL5    | 1.04  | 9.77E-16 | 1.07  | 1.00  | 0.08  | 0.5337 |
| ILMN_1783276 | NEXN       | 1.73  | 1.37E-13 | 1.81  | 1.64  | 0.17  | 0.5339 |
| ILMN_3243928 | DDX60L     | 1.38  | 2.36E-15 | 1.33  | 1.42  | -0.09 | 0.5339 |
| ILMN_1733937 | MMD        | -1.48 | 8.40E-10 | -1.57 | -1.40 | -0.17 | 0.5343 |
| ILMN_1785356 | DENND5A    | 0.75  | 2.57E-06 | 0.81  | 0.70  | 0.11  | 0.5345 |
| ILMN_1698621 | COG5       | 0.61  | 4.69E-13 | 0.65  | 0.57  | 0.07  | 0.5356 |
| ILMN_1694213 | PLEKHO1    | 0.93  | 1.77E-09 | 1.00  | 0.86  | 0.13  | 0.5359 |
| ILMN_3240740 | EIF3L      | -0.65 | 6.95E-11 | -0.69 | -0.61 | -0.08 | 0.5360 |
| ILMN_1753342 | SAT1       | 0.95  | 2.49E-14 | 1.00  | 0.91  | 0.09  | 0.5377 |



|              |              |       |          |       |       |       |        |
|--------------|--------------|-------|----------|-------|-------|-------|--------|
| ILMN_2070044 | PPM1K        | 1.52  | 1.04E-15 | 1.59  | 1.46  | 0.12  | 0.5398 |
| ILMN_1666594 | IRF8         | -0.62 | 8.09E-10 | -0.65 | -0.58 | -0.06 | 0.5400 |
| ILMN_1812701 | C4orf33      | 0.76  | 1.63E-07 | 0.79  | 0.72  | 0.08  | 0.5406 |
| ILMN_3253787 | LOC100128274 | 0.91  | 6.27E-15 | 0.87  | 0.95  | -0.08 | 0.5410 |
| ILMN_3259146 | LOC100129681 | 1.47  | 1.81E-14 | 1.42  | 1.52  | -0.10 | 0.5410 |
| ILMN_1699022 | ENDOD1       | 0.84  | 5.66E-09 | 0.90  | 0.78  | 0.12  | 0.5415 |
| ILMN_1768127 | EBNA1BP2     | -0.59 | 4.17E-09 | -0.63 | -0.56 | -0.07 | 0.5423 |
| ILMN_1694466 | ZBED1        | 0.89  | 1.93E-07 | 0.96  | 0.82  | 0.14  | 0.5430 |
| ILMN_2170353 | PTPLB        | -0.72 | 5.46E-10 | -0.76 | -0.67 | -0.08 | 0.5431 |
| ILMN_1687768 | NCOA7        | 1.95  | 1.77E-16 | 2.02  | 1.88  | 0.14  | 0.5431 |
| ILMN_1777663 | TOP2B        | -0.88 | 1.05E-13 | -0.92 | -0.84 | -0.08 | 0.5437 |
| ILMN_3235808 | POM121C      | -0.63 | 4.27E-10 | -0.67 | -0.60 | -0.07 | 0.5440 |
| ILMN_1769383 | GIMAP5       | 0.67  | 2.16E-02 | 0.61  | 0.73  | -0.12 | 0.5440 |
| ILMN_1708095 | PANK2        | 0.89  | 3.06E-14 | 0.93  | 0.85  | 0.08  | 0.5442 |
| ILMN_1652736 | RPS6KA3      | -0.71 | 3.40E-16 | -0.68 | -0.74 | 0.06  | 0.5445 |
| ILMN_2198376 | PSMA4        | 1.02  | 2.76E-12 | 1.08  | 0.97  | 0.11  | 0.5450 |
| ILMN_1778236 | PTPN11       | -0.66 | 1.47E-11 | -0.69 | -0.62 | -0.08 | 0.5456 |
| ILMN_1801766 | CCDC109B     | 0.88  | 2.02E-08 | 0.94  | 0.83  | 0.11  | 0.5458 |
| ILMN_1814305 | SAMD9        | 2.91  | 3.80E-22 | 2.99  | 2.84  | 0.15  | 0.5487 |
| ILMN_3300663 | LOC728661    | -0.68 | 1.49E-09 | -0.64 | -0.72 | 0.08  | 0.5493 |
| ILMN_1689371 | GIMAP2       | 0.77  | 1.55E-10 | 0.82  | 0.73  | 0.09  | 0.5493 |
| ILMN_1805410 | C15orf48     | 1.29  | 1.90E-10 | 1.34  | 1.25  | 0.09  | 0.5498 |
| ILMN_1781638 | HDCC3        | -0.82 | 6.56E-16 | -0.86 | -0.79 | -0.06 | 0.5512 |
| ILMN_2232478 | APOBEC3G     | 2.31  | 4.09E-18 | 2.39  | 2.24  | 0.14  | 0.5514 |
| ILMN_3240117 | AIDA         | 0.70  | 2.72E-13 | 0.74  | 0.66  | 0.08  | 0.5517 |
| ILMN_1724139 | TMEM123      | 1.24  | 1.36E-15 | 1.29  | 1.19  | 0.10  | 0.5524 |
| ILMN_1731224 | PARP9        | 2.39  | 7.03E-26 | 2.42  | 2.35  | 0.08  | 0.5532 |
| ILMN_1915076 |              | -0.71 | 2.02E-10 | -0.75 | -0.66 | -0.08 | 0.5542 |
| ILMN_2363065 | RTN3         | -0.69 | 1.79E-10 | -0.73 | -0.66 | -0.07 | 0.5567 |
| ILMN_1750088 | VRK2         | 0.66  | 3.97E-15 | 0.63  | 0.69  | -0.06 | 0.5581 |
| ILMN_1786658 | BOLA3        | -0.82 | 9.79E-11 | -0.85 | -0.78 | -0.07 | 0.5581 |
| ILMN_1761281 | LOC441019    | 0.66  | 1.76E-04 | 0.72  | 0.61  | 0.11  | 0.5581 |
| ILMN_1789361 | PKD2L1       | 0.63  | 9.17E-06 | 0.67  | 0.59  | 0.09  | 0.5581 |
| ILMN_1691731 | PARP14       | 1.80  | 4.85E-22 | 1.76  | 1.84  | -0.09 | 0.5581 |
| ILMN_1788192 | ARMCX1       | 0.97  | 4.31E-12 | 1.00  | 0.93  | 0.07  | 0.5592 |
| ILMN_1722276 | PAFAH1B1     | -0.70 | 5.98E-11 | -0.73 | -0.67 | -0.07 | 0.5601 |
| ILMN_1703263 | SP140        | 1.56  | 6.76E-16 | 1.62  | 1.50  | 0.12  | 0.5611 |
| ILMN_2347798 | IFI6         | 2.51  | 2.60E-22 | 2.57  | 2.45  | 0.12  | 0.5612 |
| ILMN_1786612 | PSME2        | 1.57  | 3.13E-18 | 1.62  | 1.52  | 0.10  | 0.5616 |
| ILMN_2358626 | ADK          | -0.68 | 8.29E-08 | -0.72 | -0.64 | -0.08 | 0.5621 |
| ILMN_1766169 | BCAT1        | -1.05 | 5.00E-08 | -1.11 | -0.98 | -0.13 | 0.5635 |
| ILMN_1757343 | PABPC4       | -0.68 | 5.92E-14 | -0.65 | -0.71 | 0.06  | 0.5640 |
| ILMN_1750400 | C19orf66     | 1.66  | 6.80E-19 | 1.60  | 1.71  | -0.10 | 0.5662 |
| ILMN_1665428 | GSDMD        | 1.26  | 5.53E-10 | 1.33  | 1.18  | 0.15  | 0.5664 |
| ILMN_3305273 | LOC729779    | 0.92  | 1.53E-07 | 0.95  | 0.88  | 0.07  | 0.5686 |
| ILMN_1708934 | ADM          | 1.55  | 6.63E-16 | 1.61  | 1.48  | 0.13  | 0.5686 |
| ILMN_1701947 | GPR34        | -1.63 | 4.02E-10 | -1.71 | -1.54 | -0.17 | 0.5704 |
| ILMN_1783846 | RAPH1        | -0.66 | 3.35E-08 | -0.69 | -0.62 | -0.08 | 0.5714 |
| ILMN_2124802 | MT1H         | -2.93 | 3.08E-11 | -3.10 | -2.77 | -0.33 | 0.5721 |
| ILMN_1709348 | ALDH1A1      | 0.94  | 1.33E-10 | 0.97  | 0.90  | 0.07  | 0.5725 |
| ILMN_1738677 | PRPF8        | -0.78 | 9.55E-13 | -0.82 | -0.74 | -0.07 | 0.5736 |
| ILMN_1677843 | RAB24        | 0.81  | 7.79E-11 | 0.86  | 0.77  | 0.09  | 0.5738 |
| ILMN_1810560 | P8           | 2.36  | 1.12E-09 | 2.47  | 2.25  | 0.22  | 0.5752 |
| ILMN_1765994 | ZBP1         | 1.84  | 2.39E-11 | 1.93  | 1.74  | 0.19  | 0.5757 |
| ILMN_3243593 | LOC100008588 | -1.03 | 1.55E-10 | -1.07 | -0.99 | -0.08 | 0.5758 |
| ILMN_2043265 | ZFP106       | -0.61 | 1.37E-11 | -0.64 | -0.58 | -0.05 | 0.5765 |
| ILMN_1761941 | C4orf18      | -0.71 | 7.45E-10 | -0.75 | -0.67 | -0.08 | 0.5767 |
| ILMN_2139943 | RPS3A        | -0.76 | 2.91E-12 | -0.80 | -0.72 | -0.08 | 0.5768 |
| ILMN_1802106 | APOBEC3G     | 2.42  | 3.27E-18 | 2.48  | 2.35  | 0.13  | 0.5773 |
| ILMN_1773200 | CP110        | 0.64  | 1.91E-08 | 0.68  | 0.60  | 0.08  | 0.5784 |
| ILMN_1745994 | GAS7         | -0.70 | 1.77E-05 | -0.74 | -0.67 | -0.07 | 0.5786 |
| ILMN_1726591 | CARD16       | 0.98  | 7.60E-10 | 1.03  | 0.94  | 0.10  | 0.5793 |
| ILMN_1769517 | PRKDC        | -0.70 | 3.89E-10 | -0.74 | -0.66 | -0.08 | 0.5797 |
| ILMN_1706094 | HECTD1       | -0.81 | 1.63E-08 | -0.85 | -0.77 | -0.08 | 0.5800 |
| ILMN_3307659 | SFT2D2       | 1.15  | 1.08E-12 | 1.20  | 1.10  | 0.10  | 0.5806 |
| ILMN_2373791 | ENPP2        | 0.89  | 2.65E-09 | 0.95  | 0.84  | 0.11  | 0.5810 |
| ILMN_1713749 | CORO1A       | -0.88 | 2.29E-05 | -0.94 | -0.83 | -0.11 | 0.5818 |
| ILMN_1752526 | RNF144B      | 1.08  | 4.82E-08 | 1.15  | 1.01  | 0.14  | 0.5843 |
| ILMN_2329429 | GIMAP6       | 0.83  | 1.89E-04 | 0.87  | 0.79  | 0.08  | 0.5843 |
| ILMN_1728106 | TNF          | 1.24  | 1.47E-08 | 1.29  | 1.19  | 0.10  | 0.5851 |
| ILMN_2138589 | MERTK        | -0.71 | 1.97E-03 | -0.74 | -0.67 | -0.08 | 0.5856 |
| ILMN_1733560 | SPG21        | 0.59  | 1.30E-12 | 0.62  | 0.57  | 0.05  | 0.5859 |
| ILMN_1725981 | LOC654189    | 0.59  | 5.97E-10 | 0.62  | 0.56  | 0.06  | 0.5860 |
| ILMN_1779252 | TRIM22       | 2.77  | 9.29E-23 | 2.82  | 2.71  | 0.11  | 0.5874 |
| ILMN_2073307 | IL10         | 0.79  | 1.46E-06 | 0.73  | 0.84  | -0.11 | 0.5877 |
| ILMN_2220739 | TMCO3        | -0.65 | 2.39E-11 | -0.68 | -0.62 | -0.06 | 0.5899 |

|              |           |       |          |       |       |       |        |
|--------------|-----------|-------|----------|-------|-------|-------|--------|
| ILMN_1788931 | DOCK8     | 0.80  | 9.25E-09 | 0.84  | 0.75  | 0.08  | 0.5905 |
| ILMN_2125562 | MOBK1B    | 0.70  | 2.00E-11 | 0.74  | 0.66  | 0.08  | 0.5911 |
| ILMN_1725471 | GK        | 0.74  | 1.70E-10 | 0.78  | 0.70  | 0.09  | 0.5911 |
| ILMN_3280565 | LOC389342 | -0.70 | 2.32E-09 | -0.75 | -0.66 | -0.09 | 0.5913 |
| ILMN_3242011 | MOBKL1B   | 0.63  | 4.27E-08 | 0.68  | 0.59  | 0.09  | 0.5915 |
| ILMN_1704753 | EPAS1     | -0.75 | 4.65E-08 | -0.80 | -0.70 | -0.10 | 0.5924 |
| ILMN_1788223 | RSPH3     | 1.10  | 3.35E-09 | 1.16  | 1.05  | 0.11  | 0.5930 |
| ILMN_2326512 | CASP1     | 1.63  | 4.81E-14 | 1.69  | 1.58  | 0.12  | 0.5936 |
| ILMN_1725700 | MOV10     | 1.00  | 6.81E-14 | 1.05  | 0.96  | 0.09  | 0.5937 |
| ILMN_1662578 | C1GALT1   | 0.87  | 3.59E-12 | 0.91  | 0.83  | 0.08  | 0.5939 |
| ILMN_1680618 | MYC       | -0.69 | 3.07E-07 | -0.74 | -0.63 | -0.10 | 0.5949 |
| ILMN_1654696 | C15orf48  | 1.28  | 1.93E-10 | 1.33  | 1.24  | 0.10  | 0.5950 |
| ILMN_1677262 | LOC388621 | -0.63 | 9.62E-12 | -0.66 | -0.60 | -0.06 | 0.5952 |
| ILMN_1806651 | PARP8     | 0.91  | 8.36E-13 | 0.96  | 0.87  | 0.09  | 0.5955 |
| ILMN_1729161 | NOTCH1    | -0.63 | 2.57E-05 | -0.68 | -0.59 | -0.10 | 0.5965 |
| ILMN_1692219 | RAB11FIP1 | -1.41 | 2.11E-12 | -1.46 | -1.36 | -0.11 | 0.5970 |
| ILMN_1675542 | LOC729148 | -0.59 | 5.45E-12 | -0.62 | -0.56 | -0.06 | 0.5978 |
| ILMN_1774733 | SOCS1     | 1.04  | 5.65E-12 | 1.10  | 0.99  | 0.11  | 0.6015 |
| ILMN_1753534 | RPS18     | -0.60 | 2.49E-12 | -0.63 | -0.57 | -0.06 | 0.6023 |
| ILMN_2075334 | HIST1H4C  | -0.98 | 1.13E-08 | -0.93 | -1.03 | 0.10  | 0.6024 |
| ILMN_1760858 | RAB8A     | 0.84  | 1.87E-11 | 0.88  | 0.81  | 0.07  | 0.6026 |
| ILMN_1667232 | KIR2DL3   | 0.85  | 2.16E-07 | 0.91  | 0.79  | 0.12  | 0.6037 |
| ILMN_1724493 | LYSM2     | 1.99  | 9.16E-13 | 2.05  | 1.93  | 0.13  | 0.6042 |
| ILMN_1791211 | DOK2      | -0.74 | 8.75E-07 | -0.79 | -0.69 | -0.09 | 0.6052 |
| ILMN_2127605 | LRP3      | -0.70 | 5.52E-17 | -0.73 | -0.68 | -0.06 | 0.6063 |
| ILMN_1802780 | M160      | -1.18 | 1.73E-04 | -1.10 | -1.27 | 0.17  | 0.6067 |
| ILMN_1672496 | DNAJA1    | 0.84  | 7.57E-12 | 0.80  | 0.89  | -0.09 | 0.6069 |
| ILMN_1777565 | TAP2      | 1.33  | 1.24E-12 | 1.38  | 1.29  | 0.09  | 0.6070 |
| ILMN_1737947 | LSM5      | -0.60 | 3.15E-10 | -0.57 | -0.63 | 0.06  | 0.6073 |
| ILMN_1786976 | RAB22A    | -1.08 | 5.52E-17 | -1.12 | -1.05 | -0.07 | 0.6085 |
| ILMN_2166524 | CCNYL1    | 0.90  | 2.43E-14 | 0.93  | 0.86  | 0.07  | 0.6091 |
| ILMN_1797728 | HMGCS1    | -0.65 | 3.89E-06 | -0.62 | -0.67 | 0.06  | 0.6099 |
| ILMN_3297126 | TYMP      | 1.60  | 2.31E-16 | 1.64  | 1.56  | 0.09  | 0.6100 |
| ILMN_2159272 | PDCD1LG2  | 0.94  | 1.17E-10 | 0.99  | 0.89  | 0.09  | 0.6107 |
| ILMN_1769013 | ASGR1     | -0.84 | 6.65E-07 | -0.89 | -0.80 | -0.09 | 0.6107 |
| ILMN_1677534 | SCAP      | -0.63 | 1.22E-12 | -0.65 | -0.60 | -0.05 | 0.6108 |
| ILMN_1784661 | TMEM2     | -0.67 | 6.16E-07 | -0.70 | -0.63 | -0.07 | 0.6116 |
| ILMN_1726245 | TGFBR2    | -1.03 | 5.40E-12 | -1.07 | -0.99 | -0.08 | 0.6117 |
| ILMN_2104696 | ERICH1    | 0.65  | 4.86E-13 | 0.68  | 0.62  | 0.06  | 0.6136 |
| ILMN_2367070 | ACOT9     | 0.75  | 1.34E-13 | 0.78  | 0.72  | 0.06  | 0.6142 |
| ILMN_2054019 | ISG15     | 5.25  | 5.55E-32 | 5.20  | 5.30  | -0.09 | 0.6144 |
| ILMN_1693431 | C13orf31  | 0.74  | 5.26E-04 | 0.70  | 0.78  | -0.08 | 0.6164 |
| ILMN_1691436 | BLVRA     | 0.83  | 2.82E-11 | 0.87  | 0.80  | 0.07  | 0.6172 |
| ILMN_1651254 | LPP       | -0.90 | 2.05E-11 | -0.93 | -0.86 | -0.07 | 0.6176 |
| ILMN_1777325 | STAT1     | 2.16  | 2.12E-21 | 2.20  | 2.11  | 0.09  | 0.6178 |
| ILMN_1756541 | MXD4      | -1.16 | 2.34E-12 | -1.12 | -1.21 | 0.09  | 0.6185 |
| ILMN_1683178 | JAK2      | 1.03  | 2.57E-13 | 1.07  | 0.99  | 0.08  | 0.6211 |
| ILMN_2373763 | CASP7     | 0.97  | 1.96E-19 | 1.00  | 0.94  | 0.06  | 0.6227 |
| ILMN_1710844 | PARP10    | 1.40  | 5.97E-19 | 1.44  | 1.36  | 0.08  | 0.6232 |
| ILMN_3232894 | CNRIP1    | -0.77 | 6.85E-05 | -0.74 | -0.81 | 0.08  | 0.6233 |
| ILMN_1720083 | EHD4      | 0.64  | 6.81E-08 | 0.68  | 0.60  | 0.08  | 0.6245 |
| ILMN_1815134 | PI4KB2B   | 1.15  | 6.93E-16 | 1.18  | 1.11  | 0.07  | 0.6246 |
| ILMN_1763540 | PSME4     | -0.71 | 2.65E-08 | -0.74 | -0.69 | -0.05 | 0.6247 |
| ILMN_1663916 | ARHGAP9   | -0.68 | 1.09E-07 | -0.72 | -0.64 | -0.07 | 0.6259 |
| ILMN_1676515 | IMPDH1    | -0.63 | 2.32E-14 | -0.60 | -0.65 | 0.05  | 0.6271 |
| ILMN_1736441 | PDXP      | -1.01 | 6.38E-13 | -1.05 | -0.97 | -0.08 | 0.6274 |
| ILMN_1736863 | TMEM140   | 1.07  | 2.02E-10 | 1.11  | 1.02  | 0.09  | 0.6289 |
| ILMN_1712112 | RCAN1     | 1.26  | 1.48E-09 | 1.21  | 1.31  | -0.09 | 0.6305 |
| ILMN_1712634 | TIA1      | 0.80  | 3.56E-16 | 0.83  | 0.78  | 0.05  | 0.6315 |
| ILMN_2098616 | C5orf39   | 1.00  | 3.71E-11 | 1.05  | 0.95  | 0.09  | 0.6323 |
| ILMN_2100209 | CCL4L1    | 1.60  | 1.72E-06 | 1.69  | 1.52  | 0.16  | 0.6324 |
| ILMN_3233179 | LOC728969 | -0.60 | 1.05E-08 | -0.57 | -0.63 | 0.06  | 0.6330 |
| ILMN_1739541 | NMI       | 0.88  | 3.54E-11 | 0.84  | 0.92  | -0.07 | 0.6347 |
| ILMN_1670305 | SERPING1  | 1.39  | 1.88E-09 | 1.46  | 1.32  | 0.13  | 0.6357 |
| ILMN_1683792 | LAP3      | 1.89  | 1.44E-19 | 1.93  | 1.85  | 0.09  | 0.6361 |
| ILMN_2175075 | SFRS4     | 0.59  | 7.08E-12 | 0.61  | 0.56  | 0.05  | 0.6368 |
| ILMN_1856480 |           | -0.66 | 1.37E-07 | -0.63 | -0.69 | 0.06  | 0.6370 |
| ILMN_2184373 | IL8       | 1.23  | 1.05E-02 | 1.31  | 1.15  | 0.16  | 0.6380 |
| ILMN_2349061 | IRF7      | 2.53  | 5.02E-24 | 2.57  | 2.49  | 0.09  | 0.6398 |
| ILMN_2246510 | TSC1      | -0.64 | 2.36E-11 | -0.67 | -0.62 | -0.06 | 0.6406 |
| ILMN_1671516 | CIR1      | 0.59  | 7.81E-03 | 0.63  | 0.56  | 0.07  | 0.6412 |
| ILMN_1701114 | GBP1      | 3.32  | 3.52E-21 | 3.39  | 3.25  | 0.14  | 0.6421 |
| ILMN_1780671 | PLEKHG3   | 0.67  | 1.37E-05 | 0.72  | 0.62  | 0.10  | 0.6424 |
| ILMN_2326509 | CASP1     | 1.63  | 4.56E-14 | 1.67  | 1.58  | 0.09  | 0.6426 |
| ILMN_1678766 | DYNTL1    | 1.52  | 3.32E-15 | 1.57  | 1.48  | 0.08  | 0.6427 |
| ILMN_1801246 | IFITM1    | 3.97  | 4.05E-14 | 4.10  | 3.83  | 0.27  | 0.6428 |

|              |           |       |          |       |       |       |        |
|--------------|-----------|-------|----------|-------|-------|-------|--------|
| ILMN_2320964 | ADAR      | 1.37  | 3.42E-22 | 1.40  | 1.34  | 0.06  | 0.6435 |
| ILMN_2352303 | RASSF2    | -0.65 | 8.25E-06 | -0.69 | -0.62 | -0.07 | 0.6448 |
| ILMN_1802151 | OSBPL5    | 0.76  | 1.00E-09 | 0.80  | 0.72  | 0.08  | 0.6451 |
| ILMN_1796339 | PLEKHA2   | 0.62  | 2.93E-10 | 0.60  | 0.65  | -0.05 | 0.6453 |
| ILMN_1672834 | SSH2      | -0.61 | 2.31E-13 | -0.63 | -0.58 | -0.05 | 0.6460 |
| ILMN_1812552 | PHCA      | -0.61 | 2.50E-13 | -0.63 | -0.58 | -0.05 | 0.6472 |
| ILMN_2057573 | FAM62B    | -0.97 | 2.78E-12 | -1.00 | -0.93 | -0.07 | 0.6484 |
| ILMN_1796595 | C5orf22   | 0.63  | 6.29E-17 | 0.66  | 0.61  | 0.05  | 0.6493 |
| ILMN_1703337 | LOC441763 | -1.08 | 1.03E-09 | -1.11 | -1.06 | -0.06 | 0.6499 |
| ILMN_2165867 | DHCR7     | -0.63 | 7.49E-05 | -0.65 | -0.60 | -0.06 | 0.6508 |
| ILMN_1762308 | LOC654191 | -0.70 | 1.71E-10 | -0.72 | -0.67 | -0.05 | 0.6527 |
| ILMN_1662130 | LOC730316 | -0.66 | 4.94E-11 | -0.68 | -0.64 | -0.05 | 0.6529 |
| ILMN_1701455 | FBXO6     | 1.78  | 9.40E-19 | 1.74  | 1.83  | -0.08 | 0.6529 |
| ILMN_1690806 | PTPLB     | -0.74 | 1.25E-09 | -0.77 | -0.71 | -0.06 | 0.6536 |
| ILMN_1747195 | PSMB8     | 0.81  | 1.25E-10 | 0.85  | 0.77  | 0.08  | 0.6538 |
| ILMN_1764577 | MFNG      | -0.59 | 1.26E-12 | -0.61 | -0.56 | -0.05 | 0.6547 |
| ILMN_1763637 | KIAA0226  | 0.63  | 2.19E-11 | 0.66  | 0.60  | 0.07  | 0.6548 |
| ILMN_2389935 | FYTTD1    | 0.66  | 5.04E-17 | 0.64  | 0.68  | -0.04 | 0.6555 |
| ILMN_1786065 | UHRF1     | -0.61 | 9.41E-08 | -0.57 | -0.65 | 0.08  | 0.6563 |
| ILMN_1676719 | LOC644330 | 0.66  | 5.92E-14 | 0.63  | 0.69  | -0.05 | 0.6566 |
| ILMN_1728975 | SCO1      | 0.66  | 5.17E-12 | 0.64  | 0.69  | -0.05 | 0.6573 |
| ILMN_1821176 |           | -0.99 | 2.43E-14 | -1.03 | -0.96 | -0.07 | 0.6576 |
| ILMN_1798705 | CCNC      | 0.64  | 7.76E-13 | 0.67  | 0.61  | 0.05  | 0.6577 |
| ILMN_1779886 | TBC1D14   | -0.76 | 3.26E-07 | -0.78 | -0.73 | -0.06 | 0.6585 |
| ILMN_1687738 | LOC650276 | -0.77 | 2.92E-07 | -0.81 | -0.74 | -0.07 | 0.6614 |
| ILMN_1654398 | RGL1      | 0.71  | 3.40E-03 | 0.74  | 0.68  | 0.06  | 0.6615 |
| ILMN_1676563 | HTRA1     | -0.83 | 3.06E-02 | -0.87 | -0.79 | -0.08 | 0.6627 |
| ILMN_2115005 | FGD2      | 0.85  | 1.60E-06 | 0.81  | 0.89  | -0.08 | 0.6633 |
| ILMN_1690939 | ECGF1     | 1.50  | 7.63E-17 | 1.54  | 1.47  | 0.07  | 0.6635 |
| ILMN_1657722 | RPS3A     | -0.69 | 2.88E-12 | -0.72 | -0.67 | -0.05 | 0.6641 |
| ILMN_1673421 | LOC440704 | 0.69  | 2.32E-10 | 0.71  | 0.67  | 0.05  | 0.6642 |
| ILMN_1705241 | TDRD7     | 1.35  | 1.27E-16 | 1.39  | 1.31  | 0.08  | 0.6651 |
| ILMN_1751726 | LOC649049 | -0.68 | 1.08E-07 | -0.72 | -0.65 | -0.06 | 0.6656 |
| ILMN_1653466 | HES4      | 2.94  | 2.78E-14 | 3.03  | 2.85  | 0.18  | 0.6675 |
| ILMN_1767509 | DEF8      | -0.61 | 8.39E-06 | -0.64 | -0.59 | -0.06 | 0.6697 |
| ILMN_2282641 | TBXAS1    | -1.18 | 1.22E-08 | -1.23 | -1.13 | -0.10 | 0.6715 |
| ILMN_2384241 | TGFBR2    | -1.13 | 1.49E-12 | -1.17 | -1.10 | -0.07 | 0.6732 |
| ILMN_1743103 | SH3PXD2A  | -0.67 | 3.37E-07 | -0.71 | -0.62 | -0.09 | 0.6733 |
| ILMN_1784380 | DTX3L     | 0.84  | 9.09E-15 | 0.81  | 0.87  | -0.05 | 0.6733 |
| ILMN_3248910 | MIR155HG  | 0.82  | 4.27E-09 | 0.79  | 0.86  | -0.07 | 0.6736 |
| ILMN_1683923 | MT1H      | -0.71 | 3.80E-08 | -0.75 | -0.68 | -0.08 | 0.6745 |
| ILMN_1839019 |           | -0.71 | 5.68E-11 | -0.74 | -0.69 | -0.05 | 0.6746 |
| ILMN_1730159 | TIFAB     | 0.62  | 4.74E-05 | 0.58  | 0.66  | -0.09 | 0.6746 |
| ILMN_1658995 | ACOT9     | 1.13  | 4.86E-15 | 1.16  | 1.10  | 0.07  | 0.6749 |
| ILMN_2232177 | ACTN1     | -0.63 | 2.74E-05 | -0.66 | -0.61 | -0.05 | 0.6758 |
| ILMN_1765076 | APPL2     | -0.67 | 3.77E-04 | -0.71 | -0.64 | -0.06 | 0.6760 |
| ILMN_1707503 | C1orf144  | 0.76  | 1.00E-15 | 0.78  | 0.73  | 0.05  | 0.6761 |
| ILMN_2388547 | EPST11    | 3.64  | 1.60E-18 | 3.68  | 3.59  | 0.10  | 0.6776 |
| ILMN_2114568 | GBP5      | 2.98  | 7.34E-18 | 3.05  | 2.92  | 0.13  | 0.6784 |
| ILMN_1759250 | TAP2      | 1.53  | 2.40E-15 | 1.58  | 1.48  | 0.09  | 0.6793 |
| ILMN_1685140 | PRRC1     | -0.59 | 1.19E-15 | -0.57 | -0.61 | 0.04  | 0.6812 |
| ILMN_2371685 | UBE2E1    | 1.18  | 1.48E-15 | 1.20  | 1.15  | 0.05  | 0.6821 |
| ILMN_1725612 | NUP50     | 0.63  | 2.64E-11 | 0.65  | 0.61  | 0.04  | 0.6826 |
| ILMN_1768812 | FXYD6     | 1.21  | 3.53E-08 | 1.26  | 1.15  | 0.11  | 0.6837 |
| ILMN_1736729 | OAS2      | 2.71  | 4.58E-24 | 2.75  | 2.67  | 0.08  | 0.6838 |
| ILMN_3251545 | CHMP5     | 0.92  | 8.53E-15 | 0.95  | 0.89  | 0.06  | 0.6840 |
| ILMN_1697567 | TPM3      | 0.74  | 6.14E-13 | 0.71  | 0.77  | -0.05 | 0.6860 |
| ILMN_1748473 | GIMAP4    | 1.33  | 3.29E-06 | 1.37  | 1.30  | 0.08  | 0.6870 |
| ILMN_1671482 | GALM      | 0.82  | 1.37E-07 | 0.86  | 0.78  | 0.08  | 0.6873 |
| ILMN_1725169 | INTS12    | 0.60  | 1.27E-13 | 0.58  | 0.62  | -0.04 | 0.6883 |
| ILMN_1687403 | MRPL40    | 0.65  | 6.82E-11 | 0.62  | 0.67  | -0.05 | 0.6889 |
| ILMN_1784871 | FASN      | -0.85 | 3.64E-07 | -0.89 | -0.82 | -0.07 | 0.6891 |
| ILMN_1747451 | PLCXD1    | -0.94 | 4.13E-07 | -0.97 | -0.90 | -0.07 | 0.6905 |
| ILMN_1684585 | ACSL1     | 0.62  | 1.29E-07 | 0.65  | 0.59  | 0.05  | 0.6906 |
| ILMN_1800225 | PPARG     | -0.65 | 1.24E-04 | -0.67 | -0.62 | -0.05 | 0.6908 |
| ILMN_1729973 | ZC3HAV1   | 1.51  | 6.22E-16 | 1.55  | 1.47  | 0.08  | 0.6918 |
| ILMN_3304802 | MGC12538  | 0.61  | 7.29E-08 | 0.65  | 0.58  | 0.07  | 0.6918 |
| ILMN_1737599 | TRIM5     | 0.83  | 2.30E-17 | 0.81  | 0.85  | -0.04 | 0.6926 |
| ILMN_1797359 | TRIM78P   | 0.61  | 9.50E-11 | 0.64  | 0.59  | 0.05  | 0.6962 |
| ILMN_2139100 | SHISA5    | 0.60  | 2.78E-09 | 0.57  | 0.62  | -0.05 | 0.6977 |
| ILMN_1809003 | CBR1      | 1.25  | 6.63E-16 | 1.22  | 1.28  | -0.07 | 0.7000 |
| ILMN_1706645 | C6orf150  | 1.16  | 7.62E-14 | 1.19  | 1.12  | 0.07  | 0.7019 |
| ILMN_1669376 | DRAM1     | 0.64  | 1.18E-03 | 0.68  | 0.60  | 0.08  | 0.7024 |
| ILMN_1792305 | ZNF318    | -0.59 | 2.12E-17 | -0.60 | -0.57 | -0.03 | 0.7027 |
| ILMN_1751079 | TAP1      | 2.25  | 9.56E-19 | 2.30  | 2.20  | 0.10  | 0.7032 |
| ILMN_1798181 | IRF7      | 3.20  | 2.27E-23 | 3.16  | 3.24  | -0.09 | 0.7041 |

|              |              |       |          |       |       |       |        |
|--------------|--------------|-------|----------|-------|-------|-------|--------|
| ILMN_2173975 | RTP4         | 1.86  | 8.25E-19 | 1.90  | 1.82  | 0.08  | 0.7048 |
| ILMN_1682098 | PSMA4        | 1.03  | 7.68E-14 | 1.00  | 1.06  | -0.06 | 0.7052 |
| ILMN_1718972 | MFSD3        | -0.60 | 1.67E-09 | -0.63 | -0.57 | -0.05 | 0.7055 |
| ILMN_1764803 | SMU1         | 0.74  | 8.73E-13 | 0.71  | 0.76  | -0.05 | 0.7057 |
| ILMN_1689734 | IL1RN        | 1.70  | 1.33E-11 | 1.65  | 1.75  | -0.10 | 0.7071 |
| ILMN_1745148 | ZNFX1        | 1.63  | 1.60E-18 | 1.67  | 1.59  | 0.08  | 0.7079 |
| ILMN_1803652 | C9orf91      | 1.45  | 2.20E-14 | 1.50  | 1.41  | 0.09  | 0.7087 |
| ILMN_1715173 | RPS6KA1      | -0.69 | 7.20E-06 | -0.72 | -0.67 | -0.05 | 0.7102 |
| ILMN_1682761 | C17orf87     | 1.56  | 1.34E-12 | 1.61  | 1.51  | 0.10  | 0.7102 |
| ILMN_1679782 | BLOC1S2      | 0.69  | 5.73E-10 | 0.66  | 0.72  | -0.06 | 0.7104 |
| ILMN_1797895 | FFAR2        | 1.27  | 3.22E-09 | 1.23  | 1.32  | -0.09 | 0.7107 |
| ILMN_1769734 | NT5C3        | 3.45  | 1.42E-21 | 3.51  | 3.39  | 0.11  | 0.7114 |
| ILMN_1763207 | BATF3        | 0.94  | 1.78E-11 | 0.98  | 0.91  | 0.07  | 0.7134 |
| ILMN_3237632 | NCLN         | -0.59 | 8.85E-05 | -0.61 | -0.57 | -0.05 | 0.7141 |
| ILMN_3301372 | LOC730167    | 0.90  | 6.41E-18 | 0.93  | 0.88  | 0.05  | 0.7141 |
| ILMN_1684306 | S100A4       | -0.69 | 1.92E-03 | -0.73 | -0.65 | -0.08 | 0.7160 |
| ILMN_1683678 | SPATS2L      | 1.27  | 1.15E-13 | 1.30  | 1.24  | 0.07  | 0.7185 |
| ILMN_1711102 | B3GNT2       | 1.14  | 1.59E-16 | 1.16  | 1.12  | 0.05  | 0.7188 |
| ILMN_1690921 | STAT2        | 1.77  | 5.78E-20 | 1.80  | 1.74  | 0.06  | 0.7191 |
| ILMN_1733559 | LOC100008589 | -1.66 | 1.77E-14 | -1.68 | -1.63 | -0.06 | 0.7194 |
| ILMN_1658885 | DAGLB        | -0.66 | 1.30E-10 | -0.68 | -0.64 | -0.03 | 0.7202 |
| ILMN_1800951 | ATXN1        | -0.62 | 1.63E-10 | -0.64 | -0.60 | -0.05 | 0.7215 |
| ILMN_1657871 | RSAD2        | 6.19  | 5.55E-32 | 6.25  | 6.14  | 0.11  | 0.7224 |
| ILMN_1715401 | MT1G         | -2.72 | 1.37E-11 | -2.81 | -2.63 | -0.18 | 0.7261 |
| ILMN_1829845 |              | 0.63  | 1.16E-05 | 0.61  | 0.66  | -0.05 | 0.7264 |
| ILMN_3247906 | RNF114       | 0.75  | 3.11E-09 | 0.77  | 0.72  | 0.05  | 0.7265 |
| ILMN_2134974 | RAB38        | 0.61  | 5.75E-05 | 0.64  | 0.59  | 0.05  | 0.7265 |
| ILMN_2266595 | LILRA5       | 0.94  | 1.37E-05 | 0.90  | 0.99  | -0.08 | 0.7269 |
| ILMN_1740875 | FPR2         | 0.59  | 1.56E-07 | 0.56  | 0.62  | -0.05 | 0.7275 |
| ILMN_1742929 | HESX1        | 2.90  | 1.03E-16 | 2.96  | 2.84  | 0.12  | 0.7275 |
| ILMN_1745471 | IRF9         | 1.24  | 2.95E-15 | 1.26  | 1.23  | 0.04  | 0.7282 |
| ILMN_2396272 | PDCD4        | -0.77 | 4.87E-14 | -0.75 | -0.79 | 0.04  | 0.7283 |
| ILMN_1667711 | HRASLS3      | 1.04  | 1.13E-07 | 1.08  | 1.00  | 0.08  | 0.7289 |
| ILMN_3247998 | STAP1        | 1.64  | 2.99E-09 | 1.70  | 1.57  | 0.13  | 0.7291 |
| ILMN_2262044 | PARP10       | 1.88  | 3.92E-21 | 1.91  | 1.85  | 0.06  | 0.7300 |
| ILMN_1728224 | OGFR         | 0.90  | 6.91E-15 | 0.92  | 0.87  | 0.05  | 0.7300 |
| ILMN_1795181 | DDX60        | 1.81  | 4.79E-21 | 1.84  | 1.78  | 0.06  | 0.7300 |
| ILMN_1780799 | ENPP2        | 0.97  | 8.60E-10 | 1.01  | 0.93  | 0.07  | 0.7304 |
| ILMN_1723412 | ASCL2        | 1.88  | 2.76E-12 | 1.93  | 1.83  | 0.10  | 0.7304 |
| ILMN_2066849 | FAM26F       | 1.70  | 7.08E-10 | 1.76  | 1.64  | 0.12  | 0.7311 |
| ILMN_1678454 | CASP4        | 0.96  | 4.49E-11 | 0.93  | 0.98  | -0.05 | 0.7319 |
| ILMN_1732534 | CHMP5        | 1.04  | 1.02E-15 | 1.01  | 1.07  | -0.05 | 0.7329 |
| ILMN_1779258 | LOC644774    | 0.59  | 1.74E-09 | 0.57  | 0.61  | -0.04 | 0.7336 |
| ILMN_1811480 | ADPRHL2      | 0.80  | 5.27E-12 | 0.78  | 0.82  | -0.04 | 0.7357 |
| ILMN_1787509 | PRIC285      | 3.36  | 5.71E-25 | 3.41  | 3.31  | 0.09  | 0.7362 |
| ILMN_1654262 | ZMAT3        | -1.03 | 1.67E-13 | -1.01 | -1.06 | 0.05  | 0.7365 |
| ILMN_2400922 | OPRL1        | -0.70 | 1.09E-15 | -0.72 | -0.68 | -0.04 | 0.7380 |
| ILMN_1784756 | ACOT7        | 0.80  | 7.45E-08 | 0.83  | 0.77  | 0.06  | 0.7383 |
| ILMN_1803429 | CD44         | -0.79 | 2.81E-06 | -0.82 | -0.76 | -0.06 | 0.7383 |
| ILMN_1776723 | PHF11        | 1.34  | 8.58E-16 | 1.31  | 1.36  | -0.05 | 0.7384 |
| ILMN_1772692 | DICER1       | -0.65 | 3.09E-10 | -0.67 | -0.63 | -0.04 | 0.7389 |
| ILMN_1666078 | HLA-H        | 0.75  | 2.42E-04 | 0.77  | 0.73  | 0.04  | 0.7390 |
| ILMN_1791447 | CXCL12       | 0.62  | 1.64E-03 | 0.58  | 0.66  | -0.08 | 0.7418 |
| ILMN_3215715 | LOC389386    | 1.61  | 2.66E-18 | 1.63  | 1.58  | 0.05  | 0.7420 |
| ILMN_1801307 | TNFSF10      | 5.02  | 1.15E-18 | 5.10  | 4.93  | 0.16  | 0.7427 |
| ILMN_1687375 | ATP2A2       | -0.66 | 1.37E-09 | -0.68 | -0.64 | -0.03 | 0.7435 |
| ILMN_1677122 | FAM168B      | -1.04 | 5.80E-15 | -1.06 | -1.01 | -0.05 | 0.7444 |
| ILMN_1753862 | SRP54        | 0.60  | 2.00E-10 | 0.62  | 0.58  | 0.04  | 0.7481 |
| ILMN_2109708 | ECGF1        | 1.04  | 5.24E-16 | 1.06  | 1.02  | 0.04  | 0.7488 |
| ILMN_1663486 | TLK2         | 0.62  | 3.62E-16 | 0.63  | 0.60  | 0.03  | 0.7488 |
| ILMN_3228108 | LOC728693    | -0.63 | 4.59E-09 | -0.65 | -0.60 | -0.05 | 0.7508 |
| ILMN_2293758 | AKAP11       | -0.62 | 1.52E-05 | -0.61 | -0.64 | 0.03  | 0.7533 |
| ILMN_1756793 | POLS         | 0.91  | 5.55E-11 | 0.93  | 0.88  | 0.05  | 0.7546 |
| ILMN_1704972 | TRIM5        | 2.49  | 1.01E-23 | 2.52  | 2.46  | 0.05  | 0.7550 |
| ILMN_1808768 | ROCK1        | -0.99 | 4.55E-17 | -1.00 | -0.97 | -0.03 | 0.7562 |
| ILMN_1803945 | HCP5         | 0.64  | 1.59E-03 | 0.68  | 0.61  | 0.07  | 0.7576 |
| ILMN_1761069 | UVRAG        | 0.65  | 8.34E-11 | 0.67  | 0.63  | 0.04  | 0.7588 |
| ILMN_1725320 | SIGLEC1      | 1.07  | 7.11E-13 | 1.09  | 1.05  | 0.04  | 0.7590 |
| ILMN_1701877 | AXL          | 1.58  | 8.75E-10 | 1.53  | 1.62  | -0.09 | 0.7595 |
| ILMN_2113333 | LGALS9B      | 0.59  | 2.00E-07 | 0.57  | 0.61  | -0.04 | 0.7603 |
| ILMN_1724333 | TOR1B        | 1.81  | 2.48E-16 | 1.85  | 1.78  | 0.07  | 0.7612 |
| ILMN_2358540 | RBMS1        | 0.82  | 4.84E-14 | 0.84  | 0.80  | 0.04  | 0.7625 |
| ILMN_1732071 | HIST2H2BE    | 0.91  | 8.20E-12 | 0.94  | 0.88  | 0.05  | 0.7630 |
| ILMN_1659761 | SNX29        | -0.72 | 5.17E-12 | -0.73 | -0.70 | -0.03 | 0.7644 |
| ILMN_1673820 | HLTF         | -0.62 | 1.30E-15 | -0.61 | -0.64 | 0.03  | 0.7675 |
| ILMN_1862217 |              | -0.79 | 1.60E-16 | -0.78 | -0.81 | 0.03  | 0.7675 |

|              |              |       |          |       |       |       |        |
|--------------|--------------|-------|----------|-------|-------|-------|--------|
| ILMN_2083469 | IRS2         | -0.59 | 1.15E-06 | -0.58 | -0.61 | 0.03  | 0.7677 |
| ILMN_1717877 | IVNS1ABP     | -0.82 | 2.41E-10 | -0.80 | -0.84 | 0.04  | 0.7680 |
| ILMN_3307757 | C17orf87     | 1.41  | 2.74E-12 | 1.45  | 1.37  | 0.07  | 0.7684 |
| ILMN_1718766 | MT1F         | -1.63 | 2.84E-11 | -1.66 | -1.60 | -0.06 | 0.7699 |
| ILMN_1772964 | CCL8         | 6.17  | 1.30E-24 | 6.13  | 6.22  | -0.10 | 0.7711 |
| ILMN_1701789 | IFIT3        | 5.07  | 1.69E-29 | 5.11  | 5.03  | 0.07  | 0.7718 |
| ILMN_1739428 | IFIT2        | 5.73  | 5.55E-32 | 5.77  | 5.69  | 0.07  | 0.7722 |
| ILMN_1658858 | SP140L       | 0.67  | 1.40E-13 | 0.68  | 0.65  | 0.04  | 0.7739 |
| ILMN_1780058 | DEGS1        | -0.68 | 8.48E-09 | -0.70 | -0.67 | -0.03 | 0.7751 |
| ILMN_1767470 | SCPEP1       | 0.59  | 1.25E-04 | 0.61  | 0.57  | 0.04  | 0.7782 |
| ILMN_1903568 |              | -0.83 | 1.69E-13 | -0.84 | -0.81 | -0.03 | 0.7784 |
| ILMN_1687384 | IFI6         | 1.63  | 8.51E-16 | 1.60  | 1.66  | -0.06 | 0.7787 |
| ILMN_2376108 | PSMB9        | 2.21  | 1.06E-18 | 2.24  | 2.18  | 0.06  | 0.7793 |
| ILMN_1754865 | LOC400455    | -0.87 | 8.74E-11 | -0.89 | -0.85 | -0.04 | 0.7794 |
| ILMN_2415235 | CSNK1E       | -0.60 | 3.23E-08 | -0.62 | -0.58 | -0.03 | 0.7802 |
| ILMN_3236428 | TMEM170B     | -1.08 | 2.44E-14 | -1.10 | -1.06 | -0.04 | 0.7805 |
| ILMN_1659960 | IL4I1        | 2.53  | 1.32E-13 | 2.57  | 2.48  | 0.09  | 0.7818 |
| ILMN_1726114 | SLC45A3      | -0.68 | 1.02E-06 | -0.70 | -0.65 | -0.05 | 0.7849 |
| ILMN_1690392 | COMMD3       | -0.61 | 2.58E-14 | -0.62 | -0.60 | -0.03 | 0.7859 |
| ILMN_1687533 | SEMA4D       | 1.45  | 1.99E-08 | 1.49  | 1.41  | 0.07  | 0.7860 |
| ILMN_1743301 | MSR1         | 0.67  | 6.01E-04 | 0.68  | 0.65  | 0.04  | 0.7862 |
| ILMN_1794612 | UBA7         | 1.50  | 1.16E-15 | 1.53  | 1.48  | 0.05  | 0.7871 |
| ILMN_1778668 | TAGLN        | 0.66  | 1.93E-07 | 0.65  | 0.68  | -0.03 | 0.7879 |
| ILMN_1738681 | NUP62        | 0.60  | 7.66E-10 | 0.61  | 0.59  | 0.03  | 0.7887 |
| ILMN_1739756 | KIR2DL4      | 0.72  | 7.78E-07 | 0.75  | 0.69  | 0.05  | 0.7888 |
| ILMN_1805990 | BAK1         | 0.73  | 2.25E-10 | 0.75  | 0.71  | 0.03  | 0.7902 |
| ILMN_1813314 | HIST1H2BK    | 0.61  | 2.19E-06 | 0.62  | 0.59  | 0.03  | 0.7910 |
| ILMN_1749432 | MRPL32       | 0.64  | 3.29E-11 | 0.62  | 0.65  | -0.03 | 0.7925 |
| ILMN_1678678 | SLC37A4      | -0.61 | 5.39E-11 | -0.63 | -0.59 | -0.03 | 0.7954 |
| ILMN_1687306 | LGALS2       | 0.83  | 5.52E-03 | 0.88  | 0.79  | 0.09  | 0.7961 |
| ILMN_2262901 | RUFY3        | 0.67  | 8.72E-10 | 0.69  | 0.65  | 0.04  | 0.7964 |
| ILMN_1776674 | SAC3D1       | -0.68 | 1.61E-11 | -0.66 | -0.69 | 0.03  | 0.7965 |
| ILMN_1701621 | SCO2         | 0.70  | 9.80E-09 | 0.67  | 0.72  | -0.04 | 0.7968 |
| ILMN_1657796 | STMN1        | -0.66 | 2.14E-09 | -0.68 | -0.64 | -0.04 | 0.7983 |
| ILMN_1742618 | XAF1         | 2.82  | 2.95E-23 | 2.84  | 2.80  | 0.04  | 0.7990 |
| ILMN_1669113 | ATF5         | 1.99  | 1.82E-12 | 2.03  | 1.96  | 0.06  | 0.8019 |
| ILMN_1756806 | MCL1         | 1.41  | 1.64E-18 | 1.39  | 1.43  | -0.04 | 0.8025 |
| ILMN_1659913 | ISG20        | 5.24  | 2.52E-22 | 5.30  | 5.18  | 0.11  | 0.8033 |
| ILMN_1751097 | CREB3L2      | -0.66 | 1.34E-12 | -0.67 | -0.64 | -0.03 | 0.8056 |
| ILMN_2363591 | SDCBP        | 0.60  | 3.82E-07 | 0.58  | 0.62  | -0.04 | 0.8061 |
| ILMN_1764764 | MUM1         | -0.74 | 3.40E-13 | -0.73 | -0.75 | 0.03  | 0.8073 |
| ILMN_1777233 | E2F2         | -0.71 | 4.80E-07 | -0.73 | -0.68 | -0.05 | 0.8078 |
| ILMN_2248970 | OAS2         | 1.72  | 4.85E-15 | 1.70  | 1.73  | -0.04 | 0.8086 |
| ILMN_2319994 | RPL3         | -0.61 | 7.70E-08 | -0.63 | -0.59 | -0.04 | 0.8094 |
| ILMN_1716797 | CD302        | -0.60 | 1.49E-04 | -0.59 | -0.62 | 0.04  | 0.8101 |
| ILMN_2364521 | AXL          | 1.51  | 5.43E-10 | 1.48  | 1.55  | -0.07 | 0.8106 |
| ILMN_1769787 | SELO         | 0.75  | 1.55E-11 | 0.77  | 0.73  | 0.04  | 0.8150 |
| ILMN_1659206 | RARA         | -0.79 | 1.82E-11 | -0.81 | -0.78 | -0.03 | 0.8161 |
| ILMN_2352121 | NT5C3        | 3.70  | 1.29E-21 | 3.74  | 3.66  | 0.07  | 0.8162 |
| ILMN_3245390 | LOC392635    | 0.62  | 4.32E-13 | 0.61  | 0.63  | -0.03 | 0.8171 |
| ILMN_3243061 | SIGLEC14     | 1.30  | 8.53E-07 | 1.32  | 1.27  | 0.05  | 0.8174 |
| ILMN_1809477 | CARHSP1      | -0.62 | 2.34E-12 | -0.63 | -0.61 | -0.02 | 0.8176 |
| ILMN_1693338 | CYP1B1       | -0.63 | 5.99E-04 | -0.65 | -0.61 | -0.04 | 0.8196 |
| ILMN_1654560 | TLR6         | 0.75  | 3.15E-13 | 0.76  | 0.74  | 0.02  | 0.8200 |
| ILMN_1674983 | LOC387841    | -0.60 | 5.72E-06 | -0.62 | -0.57 | -0.05 | 0.8205 |
| ILMN_1792072 | FUT4         | 0.98  | 2.08E-13 | 1.00  | 0.96  | 0.04  | 0.8209 |
| ILMN_2094166 | CHMP5        | 1.18  | 8.85E-23 | 1.20  | 1.17  | 0.03  | 0.8209 |
| ILMN_1694106 | GPD1L        | -0.87 | 6.48E-14 | -0.89 | -0.86 | -0.03 | 0.8239 |
| ILMN_2223130 | SMARCA5      | 0.60  | 5.90E-08 | 0.62  | 0.58  | 0.04  | 0.8249 |
| ILMN_1683456 | CCL7         | 2.21  | 6.25E-12 | 2.24  | 2.17  | 0.07  | 0.8257 |
| ILMN_1669409 | VSIG4        | -0.61 | 1.72E-02 | -0.59 | -0.63 | 0.04  | 0.8260 |
| ILMN_1787718 | SLC27A1      | -0.83 | 2.02E-10 | -0.82 | -0.84 | 0.03  | 0.8265 |
| ILMN_3279675 | LOC388339    | -0.68 | 1.02E-13 | -0.66 | -0.69 | 0.03  | 0.8292 |
| ILMN_1758941 | REEP5        | -0.69 | 9.75E-09 | -0.68 | -0.70 | 0.03  | 0.8299 |
| ILMN_1667825 | MLKL         | 1.08  | 9.96E-13 | 1.07  | 1.10  | -0.03 | 0.8306 |
| ILMN_1665736 | LOC648024    | 0.60  | 1.17E-06 | 0.58  | 0.61  | -0.03 | 0.8309 |
| ILMN_1763609 | SLC22A16     | 0.83  | 2.02E-06 | 0.85  | 0.81  | 0.04  | 0.8310 |
| ILMN_1728236 | SLFN12       | 0.88  | 6.70E-12 | 0.90  | 0.87  | 0.03  | 0.8334 |
| ILMN_3251587 | LOC100008589 | -1.55 | 1.18E-13 | -1.56 | -1.53 | -0.03 | 0.8337 |
| ILMN_1758250 | TRAFD1       | 1.16  | 1.07E-11 | 1.18  | 1.14  | 0.04  | 0.8339 |
| ILMN_1684594 | USP24        | -0.61 | 9.58E-10 | -0.62 | -0.60 | -0.02 | 0.8340 |
| ILMN_2092850 | HPSE         | 1.35  | 7.68E-05 | 1.32  | 1.38  | -0.06 | 0.8350 |
| ILMN_1672661 | SP110        | 2.18  | 9.60E-25 | 2.20  | 2.17  | 0.03  | 0.8359 |
| ILMN_1786396 | ZZEF1        | -0.66 | 3.22E-12 | -0.67 | -0.65 | -0.02 | 0.8390 |
| ILMN_3278735 | LOC389465    | 0.62  | 6.85E-14 | 0.63  | 0.61  | 0.02  | 0.8398 |
| ILMN_3239610 | LOC100133565 | -1.04 | 1.34E-08 | -1.06 | -1.03 | -0.03 | 0.8406 |

|              |              |       |          |       |       |       |        |
|--------------|--------------|-------|----------|-------|-------|-------|--------|
| ILMN_3190833 | CCRL2        | 1.02  | 6.28E-12 | 1.01  | 1.03  | -0.02 | 0.8415 |
| ILMN_2135984 | MASTL        | 0.79  | 6.12E-13 | 0.78  | 0.81  | -0.03 | 0.8447 |
| ILMN_1660031 | P2RY6        | 0.76  | 1.66E-02 | 0.74  | 0.77  | -0.04 | 0.8451 |
| ILMN_2307903 | VCAM1        | 0.83  | 9.38E-05 | 0.85  | 0.80  | 0.05  | 0.8489 |
| ILMN_1667112 | FBXO7        | 0.63  | 2.46E-13 | 0.64  | 0.62  | 0.02  | 0.8495 |
| ILMN_3239445 | ZBTB42       | 0.85  | 5.72E-13 | 0.86  | 0.83  | 0.03  | 0.8517 |
| ILMN_2379718 | RAB24        | 0.94  | 3.45E-15 | 0.93  | 0.95  | -0.03 | 0.8524 |
| ILMN_1662129 | RCN2         | -0.65 | 1.05E-08 | -0.66 | -0.63 | -0.03 | 0.8540 |
| ILMN_2390162 | PHF11        | 1.27  | 1.78E-14 | 1.25  | 1.28  | -0.02 | 0.8549 |
| ILMN_1707858 | H2AFZ        | -0.72 | 1.90E-14 | -0.73 | -0.71 | -0.02 | 0.8564 |
| ILMN_2261784 | CCNY         | -0.78 | 6.08E-10 | -0.79 | -0.77 | -0.03 | 0.8593 |
| ILMN_3278170 | LOC441455    | 0.78  | 9.07E-14 | 0.77  | 0.79  | -0.02 | 0.8597 |
| ILMN_1769520 | UBE2L6       | 1.58  | 6.52E-20 | 1.60  | 1.57  | 0.03  | 0.8610 |
| ILMN_1783753 | TXNDC12      | -1.20 | 9.16E-13 | -1.18 | -1.22 | 0.04  | 0.8619 |
| ILMN_1745356 | CXCL9        | 1.56  | 2.32E-06 | 1.60  | 1.53  | 0.07  | 0.8632 |
| ILMN_1690241 | BATF2        | 1.66  | 1.72E-19 | 1.64  | 1.67  | -0.03 | 0.8636 |
| ILMN_1827736 |              | -1.32 | 8.35E-15 | -1.34 | -1.31 | -0.03 | 0.8642 |
| ILMN_1765258 | HLA-E        | 0.90  | 3.35E-13 | 0.91  | 0.89  | 0.02  | 0.8654 |
| ILMN_1664543 | IFIT3        | 2.20  | 1.29E-19 | 2.18  | 2.22  | -0.03 | 0.8667 |
| ILMN_2374865 | ATF3         | 0.89  | 3.53E-06 | 0.90  | 0.88  | 0.02  | 0.8698 |
| ILMN_1696432 | IDH1         | 0.69  | 9.17E-12 | 0.68  | 0.70  | -0.02 | 0.8701 |
| ILMN_1682336 | MASTL        | 1.33  | 1.00E-15 | 1.32  | 1.35  | -0.03 | 0.8703 |
| ILMN_1737406 | KLF6         | 0.99  | 8.41E-10 | 1.00  | 0.98  | 0.03  | 0.8706 |
| ILMN_1782459 | OSBPL8       | -0.70 | 4.36E-09 | -0.69 | -0.71 | 0.02  | 0.8720 |
| ILMN_1738992 | MNDA         | 1.37  | 2.32E-14 | 1.38  | 1.35  | 0.03  | 0.8723 |
| ILMN_1724753 | NIN          | -0.83 | 2.38E-14 | -0.84 | -0.83 | -0.01 | 0.8726 |
| ILMN_1727524 | ADAM9        | 0.76  | 5.81E-13 | 0.75  | 0.77  | -0.02 | 0.8736 |
| ILMN_1813455 | SP110        | 1.11  | 5.07E-16 | 1.10  | 1.12  | -0.02 | 0.8745 |
| ILMN_1796165 | GLRX5        | -0.64 | 5.90E-12 | -0.65 | -0.63 | -0.02 | 0.8749 |
| ILMN_1687519 | SNAP23       | 0.60  | 2.02E-10 | 0.61  | 0.59  | 0.02  | 0.8763 |
| ILMN_1802615 | CDK6         | -0.82 | 5.69E-14 | -0.81 | -0.83 | 0.02  | 0.8782 |
| ILMN_2059535 | PPM1F        | -0.93 | 2.54E-12 | -0.91 | -0.94 | 0.02  | 0.8792 |
| ILMN_1736548 | PHACTR4      | 1.10  | 5.90E-12 | 1.11  | 1.09  | 0.03  | 0.8811 |
| ILMN_3261938 | LOC100130154 | 0.71  | 4.79E-12 | 0.72  | 0.70  | 0.02  | 0.8828 |
| ILMN_2279635 | EIF4G2       | 0.61  | 5.90E-08 | 0.60  | 0.62  | -0.02 | 0.8843 |
| ILMN_1791328 | STK39        | -0.66 | 3.54E-12 | -0.65 | -0.67 | 0.02  | 0.8850 |
| ILMN_1733811 | JUP          | 1.72  | 1.51E-08 | 1.70  | 1.74  | -0.04 | 0.8859 |
| ILMN_1675186 | ME2          | 0.74  | 1.73E-10 | 0.73  | 0.75  | -0.02 | 0.8860 |
| ILMN_2233493 | GPBP1        | 0.60  | 2.79E-15 | 0.59  | 0.61  | -0.02 | 0.8864 |
| ILMN_2410826 | OAS1         | 3.05  | 3.58E-21 | 3.03  | 3.07  | -0.04 | 0.8880 |
| ILMN_1694603 | SMARCC1      | -0.65 | 9.90E-15 | -0.65 | -0.64 | -0.01 | 0.8883 |
| ILMN_1809285 | DCP1A        | 0.61  | 4.83E-11 | 0.62  | 0.60  | 0.02  | 0.8883 |
| ILMN_2096372 | ALDH1A1      | 0.71  | 3.31E-07 | 0.70  | 0.72  | -0.02 | 0.8883 |
| ILMN_1694757 | CTSL1        | 1.33  | 2.40E-15 | 1.34  | 1.32  | 0.02  | 0.8906 |
| ILMN_1712687 | PAK2         | -0.64 | 3.69E-11 | -0.63 | -0.64 | 0.02  | 0.8911 |
| ILMN_1778401 | HLA-B        | 0.69  | 5.74E-09 | 0.70  | 0.67  | 0.02  | 0.8913 |
| ILMN_1682165 | NT5C2        | 0.91  | 2.40E-15 | 0.92  | 0.90  | 0.02  | 0.8914 |
| ILMN_1792078 | RNF114       | 0.59  | 4.81E-07 | 0.60  | 0.58  | 0.02  | 0.8919 |
| ILMN_1781691 | TRAK2        | -0.62 | 1.28E-10 | -0.63 | -0.62 | -0.01 | 0.8919 |
| ILMN_1759460 | TAF7         | 0.60  | 1.14E-13 | 0.61  | 0.59  | 0.02  | 0.8919 |
| ILMN_1740466 | FAM46A       | 1.19  | 2.44E-14 | 1.20  | 1.17  | 0.02  | 0.8921 |
| ILMN_2371825 | AGL          | -0.71 | 1.26E-12 | -0.72 | -0.71 | -0.02 | 0.8926 |
| ILMN_2246882 | SP140        | 1.62  | 1.89E-15 | 1.63  | 1.60  | 0.03  | 0.8936 |
| ILMN_1869109 |              | -0.86 | 5.19E-18 | -0.87 | -0.85 | -0.01 | 0.8949 |
| ILMN_1695404 | LY6E         | 2.23  | 1.73E-19 | 2.24  | 2.21  | 0.03  | 0.8955 |
| ILMN_1715392 | PRPF3        | 0.63  | 6.49E-14 | 0.63  | 0.62  | 0.01  | 0.8963 |
| ILMN_2203271 | FPR3         | 1.07  | 5.27E-06 | 1.08  | 1.06  | 0.02  | 0.8968 |
| ILMN_1656501 | DUSP5        | 1.21  | 2.63E-11 | 1.22  | 1.19  | 0.02  | 0.9000 |
| ILMN_3225634 | LOC728782    | -0.63 | 2.11E-09 | -0.64 | -0.62 | -0.02 | 0.9000 |
| ILMN_1704236 | MAX          | 0.75  | 5.17E-15 | 0.76  | 0.75  | 0.01  | 0.9001 |
| ILMN_2112402 | PHF5A        | 1.09  | 2.79E-18 | 1.08  | 1.10  | -0.02 | 0.9010 |
| ILMN_1681101 | 1-Mar        | 1.03  | 1.09E-09 | 1.02  | 1.04  | -0.02 | 0.9011 |
| ILMN_1718629 | NRIP1        | 0.70  | 6.78E-07 | 0.71  | 0.69  | 0.02  | 0.9011 |
| ILMN_1747622 | CD33         | -0.62 | 1.24E-08 | -0.63 | -0.62 | -0.02 | 0.9012 |
| ILMN_1782560 | CD86         | 0.69  | 9.77E-08 | 0.70  | 0.69  | 0.02  | 0.9014 |
| ILMN_1677814 | ABCC3        | -0.76 | 1.50E-07 | -0.76 | -0.75 | -0.02 | 0.9018 |
| ILMN_1724422 | SELL         | 0.64  | 2.10E-06 | 0.66  | 0.63  | 0.02  | 0.9020 |
| ILMN_1693410 | BRI3BP       | -1.08 | 2.84E-13 | -1.09 | -1.07 | -0.02 | 0.9025 |
| ILMN_1696187 | PYGL         | -0.71 | 3.20E-06 | -0.72 | -0.70 | -0.02 | 0.9026 |
| ILMN_1713496 | ST3GAL5      | 0.83  | 7.03E-12 | 0.82  | 0.84  | -0.02 | 0.9035 |
| ILMN_1699331 | IFIT1        | 3.19  | 1.07E-17 | 3.21  | 3.16  | 0.04  | 0.9035 |
| ILMN_1680339 | PDGFRL       | 2.34  | 3.77E-12 | 2.37  | 2.32  | 0.05  | 0.9037 |
| ILMN_3236344 | CTGLF7       | 0.95  | 1.16E-08 | 0.96  | 0.94  | 0.02  | 0.9049 |
| ILMN_1745242 | PLSCR1       | 2.55  | 7.37E-25 | 2.56  | 2.54  | 0.02  | 0.9051 |
| ILMN_1753111 | NAMPT        | 2.03  | 1.87E-19 | 2.04  | 2.01  | 0.02  | 0.9066 |
| ILMN_1752639 | SLC25A24     | 0.86  | 2.10E-16 | 0.87  | 0.86  | 0.02  | 0.9070 |

|              |           |       |          |       |       |       |        |
|--------------|-----------|-------|----------|-------|-------|-------|--------|
| ILMN_2201533 | C17orf61  | -0.76 | 4.47E-18 | -0.75 | -0.76 | 0.01  | 0.9088 |
| ILMN_1795991 | C22orf28  | 1.67  | 3.08E-18 | 1.68  | 1.66  | 0.02  | 0.9098 |
| ILMN_3294741 | LOC644496 | 1.06  | 5.68E-14 | 1.07  | 1.06  | 0.02  | 0.9100 |
| ILMN_1691364 | STAT1     | 3.13  | 7.03E-26 | 3.12  | 3.14  | -0.02 | 0.9103 |
| ILMN_1750800 | ACO1      | -0.96 | 9.45E-11 | -0.95 | -0.96 | 0.02  | 0.9130 |
| ILMN_1755024 | IKBKE     | 0.90  | 2.82E-11 | 0.91  | 0.90  | 0.02  | 0.9131 |
| ILMN_1764380 | GLTP      | -0.76 | 3.84E-12 | -0.77 | -0.76 | -0.01 | 0.9135 |
| ILMN_1781085 | BRDG1     | 1.08  | 5.69E-08 | 1.10  | 1.07  | 0.03  | 0.9143 |
| ILMN_3213531 | LOC653737 | -0.59 | 1.32E-11 | -0.60 | -0.58 | -0.01 | 0.9153 |
| ILMN_1800078 | LMO2      | 0.82  | 9.56E-07 | 0.81  | 0.83  | -0.02 | 0.9157 |
| ILMN_1710937 | IFI16     | 1.89  | 2.72E-16 | 1.90  | 1.88  | 0.02  | 0.9161 |
| ILMN_1657395 | HMGCR     | -0.59 | 1.61E-06 | -0.59 | -0.58 | -0.01 | 0.9166 |
| ILMN_2362974 | CASP7     | 0.71  | 4.95E-12 | 0.72  | 0.70  | 0.01  | 0.9211 |
| ILMN_2094942 | 1-Mar     | 0.79  | 1.50E-05 | 0.78  | 0.80  | -0.02 | 0.9234 |
| ILMN_3274904 | LOC284230 | -0.59 | 3.91E-11 | -0.58 | -0.59 | 0.01  | 0.9235 |
| ILMN_2119297 | SAMD4A    | 1.03  | 7.32E-12 | 1.04  | 1.02  | 0.02  | 0.9241 |
| ILMN_1654542 | C5orf21   | -0.83 | 6.52E-16 | -0.83 | -0.82 | -0.01 | 0.9250 |
| ILMN_1729487 | GMPR      | 2.28  | 6.93E-18 | 2.29  | 2.27  | 0.02  | 0.9284 |
| ILMN_1774874 | IL1RN     | 1.10  | 1.65E-07 | 1.09  | 1.11  | -0.02 | 0.9293 |
| ILMN_1708006 | MICB      | 0.81  | 5.32E-08 | 0.80  | 0.81  | -0.01 | 0.9305 |
| ILMN_2373177 | PANK2     | 1.00  | 2.90E-18 | 1.01  | 1.00  | 0.01  | 0.9325 |
| ILMN_1677466 | DUSP6     | 0.64  | 1.23E-10 | 0.63  | 0.64  | -0.01 | 0.9329 |
| ILMN_1663281 | ZNF702P   | 1.11  | 1.05E-05 | 1.10  | 1.12  | -0.03 | 0.9330 |
| ILMN_1731745 | NINJ2     | -0.86 | 4.41E-08 | -0.85 | -0.86 | 0.01  | 0.9339 |
| ILMN_2239754 | IFIT3     | 5.49  | 1.01E-30 | 5.50  | 5.48  | 0.02  | 0.9368 |
| ILMN_1698365 | NHLRC3    | 0.71  | 7.74E-16 | 0.70  | 0.71  | -0.01 | 0.9374 |
| ILMN_1678054 | TRIM21    | 1.26  | 7.67E-19 | 1.25  | 1.26  | -0.01 | 0.9376 |
| ILMN_1729115 | LOC651816 | 0.86  | 9.14E-14 | 0.86  | 0.85  | 0.01  | 0.9385 |
| ILMN_1799467 | SAMD9L    | 2.23  | 1.77E-20 | 2.23  | 2.24  | -0.01 | 0.9410 |
| ILMN_1668526 | GVIN1     | 0.60  | 5.94E-07 | 0.60  | 0.59  | 0.01  | 0.9434 |
| ILMN_1790472 | SLC25A28  | 1.55  | 3.34E-17 | 1.56  | 1.54  | 0.01  | 0.9452 |
| ILMN_2135272 | GIMAP2    | 1.04  | 4.77E-11 | 1.04  | 1.03  | 0.01  | 0.9458 |
| ILMN_1761159 | ESYT1     | -0.68 | 1.90E-15 | -0.67 | -0.68 | 0.01  | 0.9459 |
| ILMN_2404665 | TRIM5     | 1.70  | 2.50E-20 | 1.71  | 1.70  | 0.01  | 0.9462 |
| ILMN_2094061 | IMPA2     | -0.73 | 2.95E-08 | -0.73 | -0.74 | 0.01  | 0.9462 |
| ILMN_1861376 |           | -0.77 | 7.12E-12 | -0.77 | -0.76 | -0.01 | 0.9464 |
| ILMN_2340565 | ATP2C1    | 0.73  | 3.86E-12 | 0.73  | 0.74  | -0.01 | 0.9468 |
| ILMN_1797001 | DDX58     | 2.35  | 4.72E-19 | 2.34  | 2.36  | -0.02 | 0.9468 |
| ILMN_2169439 | ITGAV     | -0.75 | 3.05E-10 | -0.76 | -0.75 | -0.01 | 0.9478 |
| ILMN_1810608 | PNPT1     | 0.95  | 1.36E-14 | 0.95  | 0.94  | 0.01  | 0.9492 |
| ILMN_1742332 | KCTD12    | -0.71 | 6.84E-06 | -0.71 | -0.70 | -0.01 | 0.9507 |
| ILMN_3240420 | USP18     | 3.16  | 1.37E-25 | 3.16  | 3.17  | -0.01 | 0.9520 |
| ILMN_1690365 | USP41     | 1.76  | 1.48E-20 | 1.76  | 1.75  | 0.01  | 0.9529 |
| ILMN_1723706 | GRAMD4    | -0.76 | 8.82E-05 | -0.76 | -0.75 | -0.01 | 0.9534 |
| ILMN_2412214 | LGALS9    | 0.80  | 1.12E-09 | 0.81  | 0.80  | 0.01  | 0.9537 |
| ILMN_1716547 | NAGK      | 0.95  | 5.73E-08 | 0.95  | 0.95  | -0.01 | 0.9539 |
| ILMN_1674201 | LOC441511 | 0.99  | 1.61E-13 | 0.99  | 0.99  | -0.01 | 0.9544 |
| ILMN_1809086 | XRN1      | 0.99  | 6.29E-13 | 1.00  | 0.99  | 0.01  | 0.9555 |
| ILMN_1653871 | NAMPT     | 1.68  | 1.04E-16 | 1.67  | 1.68  | -0.01 | 0.9603 |
| ILMN_2363426 | MAX       | 0.97  | 1.60E-15 | 0.97  | 0.96  | 0.01  | 0.9609 |
| ILMN_2101278 | RGS18     | -1.00 | 5.34E-10 | -1.01 | -1.00 | -0.01 | 0.9622 |
| ILMN_1667994 | AMD1      | 0.64  | 5.35E-10 | 0.64  | 0.63  | 0.00  | 0.9634 |
| ILMN_1664931 | GTF2E2    | 0.68  | 8.35E-12 | 0.68  | 0.69  | -0.01 | 0.9693 |
| ILMN_2307032 | OSBPL5    | 0.71  | 3.14E-09 | 0.72  | 0.71  | 0.01  | 0.9697 |
| ILMN_1709634 | CMBL      | -0.65 | 2.54E-07 | -0.65 | -0.65 | 0.01  | 0.9698 |
| ILMN_1776157 | 4-Sep     | 0.90  | 1.96E-04 | 0.91  | 0.90  | 0.01  | 0.9704 |
| ILMN_1783593 | CCL13     | 1.16  | 7.80E-04 | 1.17  | 1.16  | 0.01  | 0.9712 |
| ILMN_1808591 | LOC731049 | 0.65  | 7.47E-10 | 0.66  | 0.65  | 0.01  | 0.9724 |
| ILMN_1738523 | MYD88     | 1.12  | 5.84E-16 | 1.12  | 1.12  | 0.00  | 0.9729 |
| ILMN_2316974 | LILRB1    | 0.73  | 5.65E-07 | 0.73  | 0.73  | 0.01  | 0.9734 |
| ILMN_1735827 | NISCH     | -0.87 | 4.70E-05 | -0.88 | -0.87 | -0.01 | 0.9737 |
| ILMN_1811114 | SDS       | 1.22  | 4.06E-06 | 1.21  | 1.22  | -0.01 | 0.9740 |
| ILMN_1754076 | CACNA2D3  | -0.60 | 1.50E-04 | -0.60 | -0.60 | 0.00  | 0.9793 |
| ILMN_1672006 | SSB       | 1.66  | 3.85E-18 | 1.66  | 1.67  | 0.00  | 0.9796 |
| ILMN_2332558 | ARL5A     | -0.64 | 2.35E-09 | -0.64 | -0.64 | 0.00  | 0.9800 |
| ILMN_1735014 | KLF6      | 0.83  | 1.55E-08 | 0.83  | 0.83  | 0.01  | 0.9805 |
| ILMN_2390299 | PSMB8     | 0.90  | 1.45E-14 | 0.90  | 0.90  | 0.00  | 0.9809 |
| ILMN_1835092 |           | 1.66  | 7.37E-18 | 1.66  | 1.66  | 0.00  | 0.9822 |
| ILMN_1762861 | HLA-F     | 1.40  | 2.53E-12 | 1.40  | 1.40  | 0.00  | 0.9823 |
| ILMN_1659688 | LGALS3BP  | 1.89  | 1.17E-12 | 1.89  | 1.89  | 0.00  | 0.9834 |
| ILMN_2357134 | SPHK1     | 0.70  | 8.16E-11 | 0.70  | 0.70  | 0.00  | 0.9846 |
| ILMN_1654385 | ASB13     | -0.64 | 3.18E-13 | -0.64 | -0.64 | 0.00  | 0.9869 |
| ILMN_1675640 | OAS1      | 2.86  | 1.77E-20 | 2.86  | 2.86  | 0.00  | 0.9876 |
| ILMN_2355033 | KIAA1147  | -1.12 | 1.28E-06 | -1.12 | -1.12 | 0.00  | 0.9894 |
| ILMN_1806017 | PSME1     | 0.84  | 5.92E-10 | 0.84  | 0.84  | 0.00  | 0.9906 |
| ILMN_2078264 | C3orf38   | 1.06  | 9.64E-16 | 1.06  | 1.06  | 0.00  | 0.9914 |

|              |        |       |          |       |       |      |        |
|--------------|--------|-------|----------|-------|-------|------|--------|
| ILMN_1666733 | IL8    | 1.04  | 2.80E-03 | 1.04  | 1.03  | 0.00 | 0.9929 |
| ILMN_1661173 | TRIP4  | 0.64  | 4.16E-10 | 0.64  | 0.64  | 0.00 | 0.9938 |
| ILMN_1763228 | MEF2D  | -0.88 | 5.47E-13 | -0.88 | -0.88 | 0.00 | 0.9948 |
| ILMN_2058782 | IFI27  | 4.64  | 3.61E-18 | 4.64  | 4.64  | 0.00 | 0.9957 |
| ILMN_1657423 | SPG21  | 0.61  | 8.53E-11 | 0.61  | 0.61  | 0.00 | 0.9966 |
| ILMN_1718558 | PARP12 | 1.45  | 3.56E-19 | 1.45  | 1.45  | 0.00 | 0.9976 |
| ILMN_1793959 | ADPGK  | 0.74  | 5.90E-14 | 0.74  | 0.74  | 0.00 | 0.9980 |
| ILMN_2200917 | SLC4A7 | -1.14 | 1.88E-10 | -1.14 | -1.14 | 0.00 | 0.9990 |

---



Table S2 List of differentially expressed poly IC(L) responsive genes in PBMCs (VL- vs VL+)

| Probe        | Gene.symbols | poly I:C log2(FC) | poly I:C FDR | avg VL- log2(FC) | avg VL+ log2(FC) | two-way log2(FC) | twoWay p.value |
|--------------|--------------|-------------------|--------------|------------------|------------------|------------------|----------------|
| ILMN_2357419 | LILRA5       | 0.97              | 1.09E-05     | 0.44             | 1.50             | -1.06            | 0.0001         |
| ILMN_1699651 | IL6          | 4.84              | 2.88E-25     | 4.28             | 5.40             | -1.12            | 0.0001         |
| ILMN_1813704 | KIAA1199     | 2.72              | 6.77E-14     | 2.00             | 3.44             | -1.43            | 0.0002         |
| ILMN_1810100 | PBX3         | -0.98             | 4.41E-14     | -0.77            | -1.20            | 0.43             | 0.0002         |
| ILMN_3237878 | LOC100133875 | 1.69              | 2.50E-06     | 0.89             | 2.49             | -1.60            | 0.0002         |
| ILMN_1658639 | SLC46A3      | -0.77             | 1.82E-08     | -0.52            | -1.02            | 0.50             | 0.0003         |
| ILMN_1690342 | LTA4H        | -1.80             | 2.99E-18     | -1.47            | -2.14            | 0.67             | 0.0003         |
| ILMN_1786303 | LILRA3       | 1.51              | 1.06E-05     | 0.76             | 2.26             | -1.50            | 0.0003         |
| ILMN_1797895 | FFAR2        | 2.42              | 4.17E-11     | 1.78             | 3.06             | -1.28            | 0.0003         |
| ILMN_1799848 | ANKRD22      | 1.46              | 6.43E-04     | 0.41             | 2.51             | -2.09            | 0.0004         |
| ILMN_1731064 | CABC1        | -0.65             | 1.95E-06     | -0.40            | -0.90            | 0.50             | 0.0004         |
| ILMN_2380237 | C1QTNF1      | 0.84              | 1.60E-07     | 0.49             | 1.19             | -0.69            | 0.0004         |
| ILMN_1698218 | TRAF1        | 1.28              | 1.48E-13     | 0.99             | 1.56             | -0.56            | 0.0004         |
| ILMN_1716276 | CCL4L2       | 2.85              | 2.24E-15     | 2.21             | 3.48             | -1.27            | 0.0004         |
| ILMN_1654385 | ASB13        | -0.71             | 8.32E-14     | -0.51            | -0.90            | 0.39             | 0.0004         |
| ILMN_1804150 | HIBADH       | -0.82             | 4.15E-15     | -0.66            | -0.99            | 0.33             | 0.0004         |
| ILMN_1728106 | TNF          | 2.41              | 6.63E-13     | 1.85             | 2.97             | -1.12            | 0.0005         |
| ILMN_1718046 | ARNT2        | 0.90              | 3.72E-06     | 0.45             | 1.34             | -0.89            | 0.0005         |
| ILMN_1708934 | ADM          | 1.29              | 1.88E-05     | 0.61             | 1.96             | -1.36            | 0.0005         |
| ILMN_1730940 | KLHDC3       | -0.63             | 1.74E-10     | -0.43            | -0.82            | 0.40             | 0.0005         |
| ILMN_1722981 | TLR5         | -1.06             | 6.54E-09     | -0.68            | -1.45            | 0.77             | 0.0005         |
| ILMN_1717261 | HLA-DRB3     | -1.97             | 2.63E-11     | -2.30            | -1.64            | -0.66            | 0.0006         |
| ILMN_1753758 | IL27         | 1.15              | 2.30E-07     | 0.68             | 1.63             | -0.95            | 0.0006         |
| ILMN_1723978 | LGALS1       | -0.89             | 2.30E-04     | -1.28            | -0.49            | -0.79            | 0.0007         |
| ILMN_1672124 | C4orf18      | -1.64             | 7.98E-17     | -1.34            | -1.95            | 0.60             | 0.0007         |
| ILMN_1785202 | STAT4        | 0.70              | 2.20E-10     | 0.48             | 0.91             | -0.43            | 0.0007         |
| ILMN_1747344 | IL3RA        | 0.65              | 8.59E-03     | 0.22             | 1.08             | -0.87            | 0.0007         |
| ILMN_1729115 | LOC651816    | 0.75              | 3.07E-06     | 0.45             | 1.06             | -0.61            | 0.0007         |
| ILMN_3224926 | RBM47        | -1.05             | 8.67E-06     | -1.53            | -0.58            | -0.95            | 0.0008         |
| ILMN_1782487 | LOC400759    | 1.42              | 2.16E-11     | 1.10             | 1.75             | -0.64            | 0.0008         |
| ILMN_2150856 | SERPINB2     | 2.95              | 1.91E-13     | 2.32             | 3.58             | -1.27            | 0.0008         |
| ILMN_1707591 | TNIP3        | 0.71              | 1.03E-06     | 0.43             | 0.99             | -0.56            | 0.0008         |
| ILMN_1808591 | LOC731049    | 0.89              | 1.45E-09     | 0.59             | 1.19             | -0.60            | 0.0009         |
| ILMN_1664543 | IFIT3        | 2.89              | 9.99E-20     | 2.46             | 3.31             | -0.85            | 0.0009         |
| ILMN_2373791 | ENPP2        | 0.83              | 4.71E-09     | 0.57             | 1.08             | -0.51            | 0.0009         |
| ILMN_1694757 | CTSL1        | 2.19              | 1.07E-10     | 1.54             | 2.84             | -1.29            | 0.0009         |
| ILMN_1697268 | EMILIN2      | -0.75             | 7.68E-03     | -1.16            | -0.35            | -0.81            | 0.0009         |
| ILMN_3193271 | IRG1         | 3.32              | 2.69E-13     | 2.51             | 4.13             | -1.63            | 0.0009         |
| ILMN_1682775 | EDN1         | 1.56              | 3.10E-10     | 1.13             | 1.98             | -0.86            | 0.0009         |
| ILMN_3306730 | RBM47        | -1.21             | 3.84E-07     | -1.65            | -0.77            | -0.88            | 0.0009         |
| ILMN_2266595 | LILRA5       | 1.60              | 1.32E-06     | 0.96             | 2.23             | -1.27            | 0.0009         |
| ILMN_1807372 | ADORA2A      | 0.95              | 5.16E-08     | 0.59             | 1.31             | -0.72            | 0.0009         |
| ILMN_1751941 | LOC728772    | 0.70              | 1.70E-06     | 0.39             | 1.01             | -0.62            | 0.0009         |
| ILMN_1674811 | OASL         | 4.10              | 4.70E-29     | 3.79             | 4.40             | -0.62            | 0.0009         |
| ILMN_1651705 | CAT          | -0.98             | 2.49E-11     | -0.66            | -1.30            | 0.64             | 0.0010         |
| ILMN_2132599 | ANKRD22      | 1.27              | 1.61E-03     | 0.36             | 2.19             | -1.83            | 0.0010         |
| ILMN_1838319 | LOC730249    | 4.06              | 7.85E-16     | 3.24             | 4.87             | -1.64            | 0.0011         |
| ILMN_1682081 | RNF19B       | 0.92              | 1.07E-04     | 0.46             | 1.37             | -0.91            | 0.0011         |
| ILMN_1810275 | SLC7A7       | -0.71             | 6.43E-03     | -1.12            | -0.30            | -0.82            | 0.0011         |
| ILMN_1785732 | TNFAIP6      | 1.84              | 1.75E-06     | 1.20             | 2.49             | -1.30            | 0.0011         |
| ILMN_1788416 | FAM108C1     | 1.11              | 4.22E-07     | 0.65             | 1.58             | -0.93            | 0.0011         |
| ILMN_1653466 | HES4         | 3.67              | 3.61E-18     | 3.11             | 4.24             | -1.14            | 0.0011         |
| ILMN_1701914 | CD274        | 1.17              | 1.43E-10     | 0.81             | 1.52             | -0.70            | 0.0012         |
| ILMN_2106902 | CHES1        | -0.71             | 1.49E-10     | -0.54            | -0.87            | 0.33             | 0.0012         |
| ILMN_1688231 | TREM1        | 0.63              | 1.21E-04     | 0.30             | 0.97             | -0.66            | 0.0012         |
| ILMN_1683456 | CCL7         | 5.26              | 7.20E-20     | 4.46             | 6.06             | -1.61            | 0.0012         |
| ILMN_1731044 | KCTD14       | 0.64              | 3.77E-07     | 0.35             | 0.92             | -0.58            | 0.0013         |
| ILMN_2058782 | IFI27        | 3.99              | 3.22E-22     | 3.48             | 4.51             | -1.03            | 0.0013         |
| ILMN_2321292 | WIPI2        | -0.69             | 9.13E-15     | -0.54            | -0.84            | 0.31             | 0.0013         |
| ILMN_1793990 | ID2          | 0.69              | 6.37E-09     | 0.49             | 0.90             | -0.41            | 0.0014         |
| ILMN_1679268 | PELI1        | 0.86              | 1.58E-12     | 0.70             | 1.02             | -0.33            | 0.0014         |
| ILMN_2362858 | PILRA        | -0.90             | 9.00E-04     | -1.37            | -0.43            | -0.94            | 0.0014         |
| ILMN_1790555 | CCDC146      | 0.93              | 3.03E-12     | 1.13             | 0.73             | 0.40             | 0.0015         |
| ILMN_1738491 | SNX30        | -1.19             | 3.16E-18     | -1.01            | -1.36            | 0.35             | 0.0015         |
| ILMN_1752199 | LHPP         | -0.60             | 7.00E-05     | -0.40            | -0.80            | 0.39             | 0.0016         |
| ILMN_1654690 | CECR5        | -0.64             | 7.12E-09     | -0.43            | -0.86            | 0.44             | 0.0017         |
| ILMN_1666932 | FCGR2A       | -0.96             | 3.21E-04     | -1.45            | -0.47            | -0.98            | 0.0017         |
| ILMN_2335813 | GCH1         | 2.08              | 7.14E-17     | 1.73             | 2.43             | -0.70            | 0.0017         |
| ILMN_1670305 | SERPING1     | 0.79              | 2.04E-02     | 0.08             | 1.50             | -1.42            | 0.0017         |
| ILMN_1783753 | TXNDC12      | -1.16             | 4.32E-13     | -0.85            | -1.47            | 0.62             | 0.0017         |
| ILMN_2041101 | ANXA2P1      | -0.67             | 6.22E-03     | -0.93            | -0.41            | -0.52            | 0.0018         |
| ILMN_1701514 | TRAF3IP2     | 0.86              | 1.94E-08     | 0.59             | 1.14             | -0.54            | 0.0018         |

|              |           |       |          |       |       |       |        |
|--------------|-----------|-------|----------|-------|-------|-------|--------|
| ILMN_1658995 | ACOT9     | 0.72  | 2.61E-05 | 0.44  | 1.00  | -0.56 | 0.0019 |
| ILMN_1716797 | CD302     | -1.62 | 5.51E-14 | -1.27 | -1.97 | 0.71  | 0.0020 |
| ILMN_1742929 | HESX1     | 1.51  | 3.53E-09 | 1.03  | 2.00  | -0.97 | 0.0020 |
| ILMN_1808226 | RGS16     | 0.65  | 7.16E-09 | 0.44  | 0.86  | -0.43 | 0.0021 |
| ILMN_2129202 | IFNA14    | 3.57  | 1.99E-16 | 2.97  | 4.18  | -1.20 | 0.0021 |
| ILMN_1682245 | IFNB1     | 5.14  | 1.79E-25 | 4.65  | 5.62  | -0.97 | 0.0021 |
| ILMN_2339835 | PTGS1     | -0.80 | 3.56E-14 | -0.64 | -0.96 | 0.32  | 0.0023 |
| ILMN_1718607 | TSPAN4    | -1.26 | 2.22E-11 | -0.95 | -1.58 | 0.63  | 0.0023 |
| ILMN_1686573 | DEFB1     | 1.97  | 8.98E-08 | 1.26  | 2.68  | -1.42 | 0.0023 |
| ILMN_1696749 | LMNA      | -1.43 | 6.04E-07 | -1.82 | -1.05 | -0.76 | 0.0024 |
| ILMN_1766637 | GLA       | -0.86 | 1.44E-05 | -1.16 | -0.57 | -0.59 | 0.0024 |
| ILMN_1784602 | CDKN1A    | 0.67  | 2.54E-03 | 0.19  | 1.14  | -0.94 | 0.0024 |
| ILMN_1689836 | C5AR1     | -0.79 | 1.06E-03 | -1.20 | -0.39 | -0.81 | 0.0025 |
| ILMN_3235832 | LOC728835 | 2.93  | 1.67E-13 | 2.35  | 3.52  | -1.17 | 0.0025 |
| ILMN_1770768 | SLAMF1    | 1.15  | 2.21E-10 | 0.84  | 1.46  | -0.62 | 0.0025 |
| ILMN_1692295 | MYO1G     | 0.59  | 1.90E-03 | 0.30  | 0.88  | -0.58 | 0.0025 |
| ILMN_1745034 | SLC11A2   | 0.65  | 1.83E-04 | 0.31  | 0.99  | -0.68 | 0.0026 |
| ILMN_1751086 | ATL3      | 0.67  | 2.65E-06 | 0.45  | 0.88  | -0.43 | 0.0026 |
| ILMN_1753468 | CD63      | -0.86 | 2.79E-05 | -1.20 | -0.51 | -0.69 | 0.0026 |
| ILMN_2131861 | SOCS2     | 1.09  | 1.18E-09 | 0.77  | 1.41  | -0.65 | 0.0026 |
| ILMN_1653871 | NAMPT     | 1.19  | 5.34E-06 | 0.80  | 1.58  | -0.78 | 0.0026 |
| ILMN_1716736 | CD80      | 1.91  | 1.24E-11 | 1.44  | 2.38  | -0.94 | 0.0026 |
| ILMN_1773742 | DNAJB9    | 0.59  | 3.11E-08 | 0.38  | 0.80  | -0.42 | 0.0028 |
| ILMN_1733136 | IFNA16    | 3.45  | 3.49E-16 | 2.86  | 4.05  | -1.20 | 0.0028 |
| ILMN_1773760 | PAICS     | 0.85  | 1.38E-08 | 1.09  | 0.62  | 0.47  | 0.0028 |
| ILMN_1746836 | PTAFR     | -0.85 | 5.29E-04 | -1.24 | -0.46 | -0.77 | 0.0029 |
| ILMN_1812759 | GCH1      | 2.24  | 1.17E-16 | 1.87  | 2.61  | -0.74 | 0.0029 |
| ILMN_1753111 | NAMPT     | 1.43  | 4.79E-07 | 1.06  | 1.81  | -0.74 | 0.0029 |
| ILMN_1727284 | CD4       | -1.16 | 3.20E-13 | -0.91 | -1.42 | 0.51  | 0.0029 |
| ILMN_1722158 | CASP5     | 0.68  | 1.94E-06 | 0.41  | 0.94  | -0.53 | 0.0030 |
| ILMN_1698186 | IFNA2     | 3.66  | 3.23E-19 | 3.17  | 4.15  | -0.98 | 0.0030 |
| ILMN_2358540 | RBMS1     | 1.04  | 4.66E-11 | 0.75  | 1.32  | -0.58 | 0.0030 |
| ILMN_1672295 | ZC3H12A   | 1.50  | 3.25E-16 | 1.24  | 1.75  | -0.51 | 0.0030 |
| ILMN_1790891 | CKAP4     | 0.92  | 1.77E-04 | 0.55  | 1.29  | -0.74 | 0.0031 |
| ILMN_1699676 | C14orf147 | -0.63 | 8.14E-17 | -0.49 | -0.76 | 0.27  | 0.0031 |
| ILMN_1910908 |           | 0.82  | 1.82E-12 | 0.64  | 0.99  | -0.36 | 0.0032 |
| ILMN_1727043 | GLT25D1   | -1.23 | 2.53E-15 | -1.02 | -1.44 | 0.42  | 0.0032 |
| ILMN_1761566 | C5orf32   | 0.79  | 1.52E-04 | 0.48  | 1.09  | -0.61 | 0.0032 |
| ILMN_1684585 | ACSL1     | 1.08  | 8.10E-05 | 0.64  | 1.52  | -0.88 | 0.0032 |
| ILMN_1664595 | IFNA13    | 4.14  | 1.08E-18 | 3.54  | 4.74  | -1.19 | 0.0033 |
| ILMN_2352121 | NT5C3     | 3.07  | 1.03E-25 | 2.85  | 3.28  | -0.44 | 0.0033 |
| ILMN_1778059 | CASP4     | 0.73  | 1.04E-09 | 0.50  | 0.96  | -0.46 | 0.0034 |
| ILMN_2073235 | FTHL12    | -0.76 | 6.17E-04 | -0.96 | -0.56 | -0.40 | 0.0034 |
| ILMN_2359907 | CD68      | -0.99 | 1.35E-05 | -1.36 | -0.62 | -0.74 | 0.0034 |
| ILMN_1735093 | TIMELESS  | 0.63  | 5.69E-15 | 0.76  | 0.50  | 0.26  | 0.0036 |
| ILMN_2317730 | ELMO2     | 0.63  | 1.48E-07 | 0.42  | 0.85  | -0.43 | 0.0036 |
| ILMN_1770084 | TACC1     | -0.75 | 1.30E-17 | -0.62 | -0.88 | 0.26  | 0.0036 |
| ILMN_1787897 | CXCL1     | 3.22  | 1.81E-18 | 2.74  | 3.71  | -0.97 | 0.0037 |
| ILMN_1660847 | PFKFB3    | 0.80  | 5.33E-07 | 0.52  | 1.09  | -0.58 | 0.0037 |
| ILMN_1654696 | C15orf48  | 1.10  | 9.00E-04 | 0.58  | 1.61  | -1.03 | 0.0038 |
| ILMN_1872759 |           | 0.63  | 8.64E-11 | 0.45  | 0.82  | -0.37 | 0.0038 |
| ILMN_3245702 | IFNE      | 2.02  | 1.47E-10 | 1.48  | 2.57  | -1.09 | 0.0038 |
| ILMN_2186745 | IFNA7     | 3.03  | 5.54E-14 | 2.40  | 3.65  | -1.24 | 0.0038 |
| ILMN_1734543 | PTPRE     | -0.75 | 1.28E-04 | -1.10 | -0.39 | -0.71 | 0.0039 |
| ILMN_1678766 | DYNLT1    | 1.60  | 1.40E-20 | 1.39  | 1.81  | -0.43 | 0.0039 |
| ILMN_2364022 | SLC16A3   | -0.92 | 7.56E-06 | -1.18 | -0.66 | -0.52 | 0.0040 |
| ILMN_1703123 | AXUD1     | 1.62  | 5.39E-18 | 1.41  | 1.83  | -0.42 | 0.0040 |
| ILMN_1729915 | PILRA     | -0.75 | 1.34E-03 | -1.11 | -0.39 | -0.72 | 0.0040 |
| ILMN_1772964 | CCL8      | 6.14  | 1.18E-22 | 5.38  | 6.89  | -1.51 | 0.0040 |
| ILMN_1788213 | FRAT2     | -0.91 | 3.03E-12 | -0.71 | -1.11 | 0.40  | 0.0041 |
| ILMN_1729487 | GMPR      | 0.99  | 1.23E-09 | 0.70  | 1.27  | -0.58 | 0.0041 |
| ILMN_2043265 | ZFP106    | -0.70 | 2.48E-13 | -0.57 | -0.83 | 0.27  | 0.0041 |
| ILMN_2119297 | SAMD4A    | 0.78  | 2.29E-09 | 0.55  | 1.02  | -0.47 | 0.0043 |
| ILMN_1690806 | PTPLB     | -0.91 | 1.01E-14 | -0.74 | -1.08 | 0.34  | 0.0044 |
| ILMN_2383611 | PTPRE     | -0.97 | 2.02E-06 | -1.31 | -0.63 | -0.68 | 0.0045 |
| ILMN_1736597 | TKT       | -1.41 | 6.63E-15 | -1.17 | -1.64 | 0.48  | 0.0045 |
| ILMN_2098446 | PMAIP1    | 1.50  | 1.88E-12 | 1.22  | 1.77  | -0.55 | 0.0045 |
| ILMN_3288717 | LOC392437 | -1.06 | 1.94E-08 | -1.30 | -0.83 | -0.47 | 0.0045 |
| ILMN_1682336 | MASTL     | 1.08  | 6.70E-15 | 0.87  | 1.30  | -0.43 | 0.0046 |
| ILMN_1720998 | CA12      | 0.76  | 1.73E-04 | 0.36  | 1.16  | -0.81 | 0.0047 |
| ILMN_1779257 | CD40      | 1.22  | 9.90E-07 | 0.79  | 1.64  | -0.85 | 0.0047 |
| ILMN_3248910 | MIR155HG  | 2.39  | 1.53E-15 | 2.05  | 2.72  | -0.67 | 0.0047 |
| ILMN_1764709 | MAFB      | -0.99 | 1.57E-03 | -1.48 | -0.51 | -0.97 | 0.0047 |
| ILMN_2171384 | CXCL5     | 3.25  | 4.00E-13 | 2.73  | 3.76  | -1.02 | 0.0047 |

|              |            |       |          |       |       |       |        |
|--------------|------------|-------|----------|-------|-------|-------|--------|
| ILMN_2338038 | AK3L1      | 0.86  | 4.27E-07 | 0.60  | 1.12  | -0.52 | 0.0048 |
| ILMN_1754865 | LOC400455  | -0.83 | 3.89E-12 | -0.66 | -1.00 | 0.34  | 0.0048 |
| ILMN_1758895 | CTSK       | -0.88 | 8.73E-08 | -0.57 | -1.18 | 0.61  | 0.0049 |
| ILMN_2381899 | OPTN       | 0.64  | 8.66E-08 | 0.50  | 0.79  | -0.29 | 0.0049 |
| ILMN_3245678 | RNU1A3     | 1.01  | 5.01E-10 | 0.71  | 1.31  | -0.60 | 0.0049 |
| ILMN_1740418 | CYP27B1    | 1.43  | 2.98E-07 | 0.94  | 1.92  | -0.98 | 0.0050 |
| ILMN_1807277 | IFI30      | -1.59 | 5.85E-09 | -2.00 | -1.17 | -0.83 | 0.0050 |
| ILMN_2097997 | IFNE1      | 2.07  | 4.86E-11 | 1.55  | 2.60  | -1.05 | 0.0051 |
| ILMN_2176225 | IFNW1      | 1.63  | 2.63E-09 | 1.16  | 2.09  | -0.93 | 0.0051 |
| ILMN_1781057 | IFNW1      | 1.65  | 1.22E-09 | 1.17  | 2.13  | -0.97 | 0.0051 |
| ILMN_1660691 | RAB31      | -0.91 | 1.24E-06 | -1.15 | -0.66 | -0.49 | 0.0052 |
| ILMN_1661631 | LILRA3     | 2.02  | 5.17E-06 | 1.30  | 2.74  | -1.44 | 0.0052 |
| ILMN_3237177 | FAM175A    | 0.66  | 5.11E-05 | 0.40  | 0.92  | -0.52 | 0.0052 |
| ILMN_1734781 | IFNE1      | 1.56  | 1.64E-09 | 1.11  | 2.01  | -0.91 | 0.0052 |
| ILMN_1688663 | IFNA1      | 0.97  | 7.17E-08 | 0.63  | 1.31  | -0.67 | 0.0053 |
| ILMN_1683774 | IL2RA      | 1.28  | 6.86E-13 | 1.03  | 1.53  | -0.50 | 0.0053 |
| ILMN_2408543 | PLAUR      | 0.92  | 5.76E-04 | 0.51  | 1.33  | -0.82 | 0.0053 |
| ILMN_2406501 | SOD2       | 1.67  | 9.70E-07 | 1.21  | 2.13  | -0.91 | 0.0054 |
| ILMN_1742052 | SERPINB9   | 1.03  | 2.11E-10 | 0.84  | 1.22  | -0.38 | 0.0054 |
| ILMN_1819608 |            | -1.76 | 1.60E-19 | -1.57 | -1.95 | 0.37  | 0.0054 |
| ILMN_2355953 | LILRB4     | 0.64  | 2.60E-02 | 0.14  | 1.14  | -1.00 | 0.0055 |
| ILMN_1661861 | CSF2       | 1.12  | 3.61E-09 | 0.77  | 1.47  | -0.70 | 0.0056 |
| ILMN_1742328 | IFNA14     | 1.82  | 5.84E-10 | 1.33  | 2.32  | -0.98 | 0.0056 |
| ILMN_3190833 | CCRL2      | 1.19  | 4.31E-05 | 0.74  | 1.64  | -0.89 | 0.0056 |
| ILMN_1793859 | ALDH2      | -2.14 | 6.22E-15 | -1.83 | -2.46 | 0.64  | 0.0056 |
| ILMN_1772521 | MTHFD1L    | 0.92  | 1.30E-16 | 1.06  | 0.78  | 0.28  | 0.0057 |
| ILMN_1780546 | OSM        | 0.98  | 5.98E-07 | 0.77  | 1.18  | -0.40 | 0.0057 |
| ILMN_1685824 | B4GALT5    | 0.99  | 7.22E-07 | 0.73  | 1.26  | -0.53 | 0.0058 |
| ILMN_1695711 | FAM105A    | -0.60 | 2.98E-08 | -0.42 | -0.78 | 0.36  | 0.0058 |
| ILMN_1710923 | SLAMF7     | 0.92  | 7.61E-06 | 0.60  | 1.23  | -0.63 | 0.0059 |
| ILMN_2289849 | FCGR2A     | -0.93 | 9.26E-05 | -1.29 | -0.57 | -0.72 | 0.0059 |
| ILMN_1659047 | HIST2H2AA3 | 1.03  | 1.44E-09 | 0.78  | 1.27  | -0.48 | 0.0059 |
| ILMN_1695316 | SLC39A8    | 0.85  | 1.15E-03 | 0.47  | 1.24  | -0.76 | 0.0060 |
| ILMN_1769013 | ASGR1      | -2.55 | 2.20E-15 | -2.14 | -2.97 | 0.83  | 0.0060 |
| ILMN_2392546 | PAICS      | 0.86  | 3.21E-10 | 1.06  | 0.66  | 0.40  | 0.0060 |
| ILMN_2374865 | ATF3       | 1.27  | 7.70E-05 | 0.75  | 1.80  | -1.05 | 0.0060 |
| ILMN_1792455 | TMEM158    | -0.73 | 2.40E-03 | -1.22 | -0.24 | -0.98 | 0.0060 |
| ILMN_2092850 | HPSE       | 0.99  | 5.01E-05 | 0.61  | 1.36  | -0.75 | 0.0061 |
| ILMN_1652787 | PIK3AP1    | 0.61  | 2.61E-03 | 0.36  | 0.86  | -0.50 | 0.0065 |
| ILMN_3236428 | TMEM170B   | -1.69 | 3.30E-13 | -1.37 | -2.01 | 0.64  | 0.0065 |
| ILMN_1667893 | TNS3       | -0.87 | 4.40E-03 | -1.39 | -0.36 | -1.03 | 0.0065 |
| ILMN_1807662 | IGF2R      | -0.82 | 2.86E-09 | -1.06 | -0.58 | -0.47 | 0.0066 |
| ILMN_1667224 | SLAMF8     | -1.15 | 4.47E-05 | -1.60 | -0.70 | -0.90 | 0.0066 |
| ILMN_3238196 | CYTH4      | -0.90 | 2.46E-08 | -1.17 | -0.64 | -0.53 | 0.0067 |
| ILMN_1754894 | C1orf162   | -1.67 | 8.23E-18 | -1.44 | -1.91 | 0.48  | 0.0069 |
| ILMN_1680624 | CREG1      | -0.78 | 1.94E-04 | -1.11 | -0.45 | -0.66 | 0.0069 |
| ILMN_3308265 | MIR302C    | 1.04  | 3.03E-14 | 0.83  | 1.25  | -0.43 | 0.0070 |
| ILMN_2150851 | SERPINB2   | 4.04  | 2.68E-17 | 3.45  | 4.63  | -1.19 | 0.0071 |
| ILMN_1686623 | CSF1R      | -3.37 | 5.30E-16 | -3.79 | -2.94 | -0.85 | 0.0071 |
| ILMN_1663866 | TGFBI      | -3.77 | 3.91E-17 | -4.22 | -3.31 | -0.91 | 0.0072 |
| ILMN_1756999 | RBL2       | -0.64 | 4.46E-06 | -0.47 | -0.82 | 0.35  | 0.0073 |
| ILMN_1772131 | IL1R2      | -0.89 | 3.06E-02 | -1.54 | -0.23 | -1.31 | 0.0074 |
| ILMN_1761941 | C4orf18    | -1.30 | 1.97E-17 | -1.11 | -1.49 | 0.39  | 0.0076 |
| ILMN_2388155 | CASP3      | 0.77  | 6.30E-09 | 0.56  | 0.99  | -0.43 | 0.0076 |
| ILMN_1658830 | C10orf26   | -0.59 | 3.42E-10 | -0.44 | -0.73 | 0.29  | 0.0076 |
| ILMN_1719627 | SLC27A3    | -1.05 | 1.65E-06 | -1.36 | -0.75 | -0.61 | 0.0078 |
| ILMN_1672006 | SSB        | 0.75  | 5.35E-12 | 0.56  | 0.95  | -0.39 | 0.0078 |
| ILMN_1727200 | SLCO4A1    | 0.61  | 9.26E-09 | 0.44  | 0.78  | -0.34 | 0.0078 |
| ILMN_2324056 | GNL3       | 0.92  | 1.58E-17 | 1.08  | 0.76  | 0.32  | 0.0079 |
| ILMN_2066060 | HLA-DRB6   | -1.34 | 3.33E-02 | -1.71 | -0.96 | -0.75 | 0.0079 |
| ILMN_1813846 | P2RX4      | 0.75  | 4.11E-04 | 0.38  | 1.11  | -0.72 | 0.0080 |
| ILMN_1752562 | CXCL5      | 3.81  | 2.71E-14 | 3.30  | 4.31  | -1.01 | 0.0080 |
| ILMN_1763837 | ANPEP      | -1.73 | 6.62E-08 | -2.16 | -1.31 | -0.85 | 0.0083 |
| ILMN_2374340 | PLAUR      | 0.88  | 2.85E-03 | 0.42  | 1.35  | -0.94 | 0.0084 |
| ILMN_1701195 | PLA2G7     | -1.08 | 7.83E-04 | -1.61 | -0.54 | -1.08 | 0.0085 |
| ILMN_1691436 | BLVRA      | 0.59  | 1.46E-04 | 0.34  | 0.85  | -0.51 | 0.0085 |
| ILMN_1745964 | IRAK2      | 1.45  | 3.18E-09 | 1.17  | 1.73  | -0.56 | 0.0085 |
| ILMN_2353633 | EMR2       | -1.00 | 7.70E-05 | -1.28 | -0.72 | -0.56 | 0.0086 |
| ILMN_1763228 | MEF2D      | -1.13 | 1.00E-12 | -0.90 | -1.36 | 0.47  | 0.0088 |
| ILMN_1714861 | CD68       | -0.92 | 1.70E-06 | -1.22 | -0.63 | -0.59 | 0.0088 |
| ILMN_2109489 | GZMB       | 1.44  | 6.49E-06 | 1.01  | 1.86  | -0.84 | 0.0088 |
| ILMN_1819384 |            | 0.65  | 8.14E-15 | 0.53  | 0.78  | -0.25 | 0.0089 |
| ILMN_1758939 | RIPK2      | 1.33  | 2.66E-10 | 0.99  | 1.66  | -0.67 | 0.0089 |
| ILMN_1667476 | LTBR       | -0.87 | 1.08E-05 | -1.10 | -0.64 | -0.46 | 0.0089 |

|              |            |       |          |       |       |       |        |
|--------------|------------|-------|----------|-------|-------|-------|--------|
| ILMN_1780799 | ENPP2      | 0.91  | 2.42E-08 | 0.65  | 1.17  | -0.52 | 0.0089 |
| ILMN_1669523 | FOS        | -2.29 | 1.60E-07 | -1.99 | -2.60 | 0.61  | 0.0092 |
| ILMN_1800354 | CST3       | -2.07 | 1.80E-10 | -2.47 | -1.67 | -0.80 | 0.0093 |
| ILMN_1782922 | PDE4B      | 1.30  | 2.16E-20 | 1.17  | 1.44  | -0.27 | 0.0094 |
| ILMN_1768973 | HIST2H2AC  | 0.96  | 9.69E-09 | 0.74  | 1.18  | -0.44 | 0.0095 |
| ILMN_1695354 | BMF        | -0.66 | 3.11E-11 | -0.51 | -0.82 | 0.31  | 0.0098 |
| ILMN_2038776 | TXN        | 1.16  | 4.34E-10 | 0.89  | 1.44  | -0.55 | 0.0099 |
| ILMN_1810486 | RAB34      | -0.78 | 5.08E-12 | -0.63 | -0.93 | 0.30  | 0.0099 |
| ILMN_2065773 | SCG5       | 1.05  | 7.86E-04 | 0.48  | 1.63  | -1.15 | 0.0100 |
| ILMN_1742025 | OLFM1      | -1.08 | 3.99E-10 | -0.81 | -1.36 | 0.55  | 0.0100 |
| ILMN_1670134 | FADS1      | -0.78 | 2.01E-13 | -0.63 | -0.93 | 0.30  | 0.0102 |
| ILMN_1766045 | SH3GLB1    | 0.83  | 1.03E-09 | 0.64  | 1.01  | -0.37 | 0.0102 |
| ILMN_1728605 | TTC3       | -1.05 | 2.10E-11 | -0.91 | -1.20 | 0.29  | 0.0103 |
| ILMN_2261784 | CCNY       | -0.72 | 1.73E-08 | -0.52 | -0.93 | 0.40  | 0.0103 |
| ILMN_1812995 | CTSL1      | 2.31  | 3.32E-12 | 1.88  | 2.73  | -0.85 | 0.0104 |
| ILMN_1655549 | SIGLEC10   | -1.11 | 9.71E-08 | -0.83 | -1.39 | 0.55  | 0.0104 |
| ILMN_1696360 | CTSB       | -2.00 | 1.03E-11 | -2.27 | -1.74 | -0.53 | 0.0105 |
| ILMN_1759326 | P2RX7      | 1.10  | 3.46E-05 | 0.72  | 1.48  | -0.76 | 0.0105 |
| ILMN_2157099 | CCNA1      | 2.14  | 3.68E-13 | 1.72  | 2.56  | -0.84 | 0.0106 |
| ILMN_2110561 | IFNA8      | 2.46  | 5.95E-13 | 1.97  | 2.94  | -0.98 | 0.0106 |
| ILMN_1779886 | TBC1D14    | -1.03 | 6.64E-16 | -0.87 | -1.18 | 0.31  | 0.0106 |
| ILMN_1657871 | RSAD2      | 4.89  | 1.55E-26 | 4.49  | 5.29  | -0.81 | 0.0106 |
| ILMN_2186061 | PFKFB3     | 1.31  | 2.74E-09 | 1.00  | 1.62  | -0.62 | 0.0107 |
| ILMN_1715069 | TANK       | 0.92  | 3.52E-14 | 0.76  | 1.09  | -0.33 | 0.0108 |
| ILMN_1713751 | ADAM19     | 1.76  | 1.82E-16 | 1.51  | 2.00  | -0.49 | 0.0108 |
| ILMN_2218856 | CCL3L1     | 4.12  | 5.95E-19 | 3.62  | 4.62  | -1.00 | 0.0109 |
| ILMN_2316386 | GPBAR1     | -0.93 | 9.20E-06 | -1.32 | -0.54 | -0.78 | 0.0109 |
| ILMN_1796712 | S100A10    | -0.65 | 1.02E-06 | -0.79 | -0.50 | -0.30 | 0.0109 |
| ILMN_1669376 | DRAM1      | 0.81  | 3.39E-03 | 0.39  | 1.22  | -0.82 | 0.0109 |
| ILMN_3178302 | FNDC3B     | 0.73  | 3.72E-05 | 0.49  | 0.98  | -0.49 | 0.0110 |
| ILMN_2066066 | HLA-DRB6   | -1.52 | 7.84E-11 | -1.77 | -1.26 | -0.51 | 0.0110 |
| ILMN_3242900 | HIST2H2AA4 | 1.12  | 7.37E-10 | 0.90  | 1.34  | -0.45 | 0.0113 |
| ILMN_1769988 | IFNA10     | 1.66  | 7.12E-09 | 1.19  | 2.14  | -0.95 | 0.0113 |
| ILMN_2336781 | SOD2       | 1.04  | 1.27E-05 | 0.71  | 1.37  | -0.65 | 0.0114 |
| ILMN_3202024 | LOC392437  | -1.04 | 1.11E-08 | -1.27 | -0.82 | -0.45 | 0.0115 |
| ILMN_1680339 | PDGFRL     | 0.75  | 1.18E-07 | 0.50  | 0.99  | -0.49 | 0.0117 |
| ILMN_1700413 | MAFF       | 0.96  | 1.14E-12 | 0.76  | 1.17  | -0.40 | 0.0118 |
| ILMN_1667050 | PRPS1      | 0.67  | 4.48E-10 | 0.83  | 0.52  | 0.30  | 0.0119 |
| ILMN_1815895 | LOC649143  | -1.64 | 2.81E-03 | -1.91 | -1.36 | -0.55 | 0.0121 |
| ILMN_2054297 | PTGS2      | 2.25  | 2.18E-11 | 1.80  | 2.71  | -0.92 | 0.0121 |
| ILMN_1803744 | SELS       | 0.70  | 1.32E-08 | 0.51  | 0.89  | -0.37 | 0.0122 |
| ILMN_1796642 | NCF2       | -0.61 | 1.87E-02 | -0.88 | -0.34 | -0.54 | 0.0122 |
| ILMN_2204876 | FLVCR2     | -1.14 | 7.19E-09 | -1.40 | -0.89 | -0.52 | 0.0122 |
| ILMN_1769129 | CCL19      | 3.47  | 1.08E-24 | 3.18  | 3.76  | -0.58 | 0.0122 |
| ILMN_1767470 | SCPEP1     | -1.15 | 1.62E-10 | -1.37 | -0.92 | -0.45 | 0.0122 |
| ILMN_1769388 | GJB2       | 1.26  | 2.13E-05 | 0.80  | 1.72  | -0.92 | 0.0122 |
| ILMN_2407824 | ATP1B1     | -0.62 | 7.54E-03 | -0.94 | -0.30 | -0.64 | 0.0122 |
| ILMN_2340259 | PDE4B      | 1.12  | 2.46E-16 | 0.99  | 1.26  | -0.28 | 0.0124 |
| ILMN_1804901 | IL1F5      | 0.75  | 3.56E-05 | 0.47  | 1.04  | -0.57 | 0.0124 |
| ILMN_2144426 | HIST2H2AA3 | 0.90  | 4.51E-06 | 0.66  | 1.14  | -0.48 | 0.0126 |
| ILMN_3253456 | FNDC3B     | 0.76  | 2.35E-05 | 0.52  | 0.99  | -0.47 | 0.0126 |
| ILMN_3239965 | IDO1       | 2.28  | 1.70E-07 | 1.58  | 2.99  | -1.41 | 0.0127 |
| ILMN_1680314 | TXN        | 1.26  | 1.27E-09 | 0.96  | 1.57  | -0.60 | 0.0127 |
| ILMN_1658483 | IL1A       | 2.05  | 4.16E-12 | 1.63  | 2.48  | -0.85 | 0.0129 |
| ILMN_1724333 | TOR1B      | 0.69  | 2.24E-05 | 0.43  | 0.96  | -0.53 | 0.0129 |
| ILMN_2289093 | KIAA1618   | 2.09  | 5.18E-20 | 1.86  | 2.32  | -0.46 | 0.0130 |
| ILMN_1675266 | NAGPA      | -0.76 | 3.37E-13 | -0.63 | -0.90 | 0.27  | 0.0130 |
| ILMN_1778723 | AMICA1     | -1.92 | 7.08E-14 | -1.62 | -2.22 | 0.60  | 0.0131 |
| ILMN_1701455 | FBXO6      | 2.27  | 6.14E-17 | 1.98  | 2.56  | -0.58 | 0.0132 |
| ILMN_1794190 | CCPG1      | -0.77 | 6.22E-15 | -0.63 | -0.92 | 0.29  | 0.0132 |
| ILMN_1791759 | CXCL10     | 3.12  | 4.21E-09 | 2.27  | 3.97  | -1.69 | 0.0134 |
| ILMN_1693338 | CYP1B1     | -2.16 | 1.20E-09 | -2.51 | -1.80 | -0.71 | 0.0136 |
| ILMN_1737406 | KLF6       | 1.02  | 2.53E-13 | 0.87  | 1.16  | -0.30 | 0.0136 |
| ILMN_3240420 | USP18      | 3.17  | 1.50E-30 | 2.99  | 3.36  | -0.37 | 0.0136 |
| ILMN_2302118 | CCDC50     | 0.90  | 6.79E-10 | 0.74  | 1.05  | -0.31 | 0.0137 |
| ILMN_2284744 | HNMT       | -0.91 | 9.96E-13 | -0.75 | -1.06 | 0.31  | 0.0137 |
| ILMN_1656361 | LOC201175  | 0.67  | 9.36E-06 | 0.44  | 0.89  | -0.45 | 0.0138 |
| ILMN_1772459 | RPS23      | -0.91 | 3.44E-04 | -0.79 | -1.02 | 0.23  | 0.0140 |
| ILMN_1794825 | ALDH3A2    | -0.99 | 5.88E-17 | -0.83 | -1.15 | 0.32  | 0.0143 |
| ILMN_1740875 | FPR2       | 0.84  | 1.15E-03 | 0.54  | 1.14  | -0.59 | 0.0143 |
| ILMN_1677511 | PTGS2      | 1.07  | 1.96E-07 | 0.75  | 1.39  | -0.65 | 0.0144 |
| ILMN_1677043 | AKR7A2     | -1.04 | 1.25E-17 | -0.89 | -1.19 | 0.30  | 0.0145 |
| ILMN_1763207 | BATF3      | 1.59  | 2.40E-15 | 1.36  | 1.82  | -0.46 | 0.0146 |
| ILMN_1776023 | IFNA7      | 1.15  | 5.77E-07 | 0.77  | 1.54  | -0.77 | 0.0146 |

|              |              |       |          |       |       |       |        |
|--------------|--------------|-------|----------|-------|-------|-------|--------|
| ILMN_2392569 | FPR2         | 0.85  | 1.65E-04 | 0.58  | 1.12  | -0.53 | 0.0146 |
| ILMN_2246882 | SP140        | 1.94  | 3.50E-24 | 1.81  | 2.07  | -0.26 | 0.0148 |
| ILMN_1678454 | CASP4        | 1.00  | 2.70E-12 | 0.81  | 1.19  | -0.38 | 0.0149 |
| ILMN_1766411 | AP1S2        | -1.00 | 2.37E-10 | -0.84 | -1.16 | 0.33  | 0.0151 |
| ILMN_2054019 | ISG15        | 4.17  | 4.37E-24 | 3.80  | 4.53  | -0.73 | 0.0151 |
| ILMN_2216157 | GNA12        | -0.92 | 6.69E-12 | -0.77 | -1.06 | 0.30  | 0.0152 |
| ILMN_1784630 | KBTBD11      | -0.82 | 5.11E-09 | -0.69 | -0.96 | 0.28  | 0.0154 |
| ILMN_1665455 | DCUN1D3      | 1.11  | 8.94E-09 | 0.82  | 1.40  | -0.58 | 0.0154 |
| ILMN_1711566 | TIMP1        | -0.94 | 6.18E-04 | -1.25 | -0.64 | -0.60 | 0.0155 |
| ILMN_2334296 | IL18BP       | -1.27 | 1.29E-07 | -1.68 | -0.85 | -0.83 | 0.0157 |
| ILMN_1752592 | HLA-DRB4     | -1.42 | 1.71E-06 | -1.68 | -1.16 | -0.53 | 0.0159 |
| ILMN_2410742 | JMJD1C       | 0.66  | 4.51E-13 | 0.81  | 0.52  | 0.29  | 0.0159 |
| ILMN_1671509 | CCL3         | 4.00  | 1.22E-17 | 3.47  | 4.53  | -1.06 | 0.0160 |
| ILMN_1739985 | TAGAP        | 0.67  | 6.18E-11 | 0.51  | 0.82  | -0.31 | 0.0160 |
| ILMN_1656310 | INDO         | 2.19  | 4.90E-07 | 1.52  | 2.86  | -1.34 | 0.0162 |
| ILMN_1774287 | CFB          | 2.30  | 1.32E-10 | 1.80  | 2.81  | -1.01 | 0.0162 |
| ILMN_2105573 | CCL3L3       | 3.48  | 1.09E-18 | 3.04  | 3.91  | -0.87 | 0.0162 |
| ILMN_1706645 | C6orf150     | 0.61  | 4.76E-07 | 0.41  | 0.80  | -0.39 | 0.0163 |
| ILMN_1707339 | BTG3         | 0.81  | 1.58E-08 | 0.64  | 0.98  | -0.33 | 0.0165 |
| ILMN_2173291 | CYP4B1       | 1.05  | 1.91E-12 | 0.84  | 1.26  | -0.42 | 0.0166 |
| ILMN_1693009 | FGL2         | -2.45 | 3.59E-11 | -3.01 | -1.89 | -1.12 | 0.0167 |
| ILMN_2339863 | VPS28        | -0.73 | 9.31E-13 | -0.59 | -0.86 | 0.27  | 0.0168 |
| ILMN_1680996 | ALOX5        | -0.93 | 3.06E-05 | -0.65 | -1.20 | 0.55  | 0.0171 |
| ILMN_1750961 | TM6SF1       | -1.50 | 7.98E-17 | -1.36 | -1.65 | 0.29  | 0.0172 |
| ILMN_1653856 | STS-1        | -0.72 | 2.41E-07 | -0.56 | -0.88 | 0.32  | 0.0173 |
| ILMN_2148785 | GBP1         | 1.97  | 8.69E-08 | 1.41  | 2.52  | -1.11 | 0.0174 |
| ILMN_1681721 | OASL         | 2.91  | 3.67E-25 | 2.69  | 3.12  | -0.42 | 0.0177 |
| ILMN_2331082 | MS4A7        | -1.35 | 1.75E-04 | -1.75 | -0.95 | -0.79 | 0.0177 |
| ILMN_1665682 | IL15RA       | 1.17  | 1.11E-14 | 0.98  | 1.36  | -0.38 | 0.0179 |
| ILMN_1781580 | BRI3         | -1.03 | 3.56E-07 | -1.25 | -0.80 | -0.44 | 0.0179 |
| ILMN_1751079 | TAP1         | 1.09  | 4.54E-12 | 0.87  | 1.30  | -0.43 | 0.0181 |
| ILMN_1674250 | NCKAP1L      | -0.62 | 2.84E-11 | -0.50 | -0.73 | 0.23  | 0.0182 |
| ILMN_1747355 | CCL3L1       | 4.08  | 2.10E-18 | 3.58  | 4.58  | -1.00 | 0.0184 |
| ILMN_2059535 | PPM1F        | -1.33 | 4.26E-12 | -1.11 | -1.56 | 0.45  | 0.0185 |
| ILMN_3236239 | LOC100129550 | -1.15 | 2.22E-17 | -1.00 | -1.31 | 0.30  | 0.0187 |
| ILMN_1753472 | SUMF1        | -0.96 | 8.18E-16 | -0.84 | -1.08 | 0.24  | 0.0188 |
| ILMN_2232478 | APOBEC3G     | 1.16  | 9.13E-15 | 1.03  | 1.30  | -0.27 | 0.0189 |
| ILMN_1660364 | PSCD4        | -0.95 | 1.69E-09 | -1.17 | -0.73 | -0.43 | 0.0190 |
| ILMN_3308138 | RNU4-2       | 0.62  | 4.58E-04 | 0.37  | 0.87  | -0.49 | 0.0191 |
| ILMN_2095653 | AFMID        | -0.87 | 1.02E-05 | -0.55 | -1.18 | 0.62  | 0.0192 |
| ILMN_1801246 | IFITM1       | 2.09  | 6.62E-19 | 1.86  | 2.31  | -0.45 | 0.0193 |
| ILMN_2113535 | PCYOX1       | -0.62 | 2.68E-14 | -0.51 | -0.72 | 0.21  | 0.0193 |
| ILMN_2235851 | LINCR        | 2.74  | 8.70E-16 | 2.32  | 3.16  | -0.84 | 0.0195 |
| ILMN_1741404 | MSC          | 0.61  | 4.83E-04 | 0.40  | 0.82  | -0.43 | 0.0197 |
| ILMN_1726565 | PIK3R2       | -0.98 | 9.84E-13 | -0.84 | -1.13 | 0.29  | 0.0197 |
| ILMN_1718977 | GADD45B      | 1.26  | 2.57E-13 | 1.10  | 1.43  | -0.32 | 0.0197 |
| ILMN_1682636 | CXCL2        | 2.37  | 2.93E-13 | 2.03  | 2.72  | -0.69 | 0.0198 |
| ILMN_1752965 | GREM1        | 0.62  | 1.06E-03 | 0.33  | 0.90  | -0.57 | 0.0201 |
| ILMN_1805410 | C15orf48     | 0.80  | 2.36E-02 | 0.30  | 1.31  | -1.00 | 0.0201 |
| ILMN_1663640 | MAOA         | 1.07  | 1.88E-12 | 0.85  | 1.29  | -0.44 | 0.0203 |
| ILMN_1746517 | KYNU         | -0.70 | 1.43E-02 | -1.00 | -0.39 | -0.61 | 0.0204 |
| ILMN_2254635 | ITGAX        | -1.38 | 1.21E-07 | -1.70 | -1.07 | -0.63 | 0.0205 |
| ILMN_1758146 | SIRPA        | -1.17 | 9.69E-06 | -1.51 | -0.83 | -0.69 | 0.0205 |
| ILMN_2114568 | GBP5         | 1.97  | 8.60E-10 | 1.55  | 2.40  | -0.85 | 0.0207 |
| ILMN_1669113 | ATF5         | 0.87  | 2.00E-03 | 0.46  | 1.28  | -0.82 | 0.0207 |
| ILMN_1784553 | SDC2         | -0.97 | 5.58E-05 | -1.20 | -0.73 | -0.47 | 0.0209 |
| ILMN_1739428 | IFIT2        | 3.66  | 4.10E-22 | 3.28  | 4.04  | -0.76 | 0.0211 |
| ILMN_2373763 | CASP7        | 0.84  | 1.03E-10 | 0.69  | 1.00  | -0.31 | 0.0211 |
| ILMN_1701114 | GBP1         | 2.20  | 7.65E-10 | 1.69  | 2.71  | -1.02 | 0.0212 |
| ILMN_1810289 | FER1L3       | -0.78 | 1.96E-02 | -1.25 | -0.30 | -0.95 | 0.0212 |
| ILMN_1712532 | CARD9        | -2.46 | 1.56E-19 | -2.29 | -2.64 | 0.35  | 0.0214 |
| ILMN_1796976 | NLRC4        | -0.85 | 5.40E-10 | -0.74 | -0.96 | 0.22  | 0.0214 |
| ILMN_1785852 | OBFC2A       | 0.95  | 3.72E-14 | 0.81  | 1.10  | -0.29 | 0.0214 |
| ILMN_1671353 | IL12A        | 0.84  | 2.98E-08 | 0.61  | 1.08  | -0.47 | 0.0214 |
| ILMN_1788802 | GCH1         | 1.01  | 4.73E-13 | 0.83  | 1.19  | -0.35 | 0.0216 |
| ILMN_1903568 |              | -0.71 | 3.86E-13 | -0.59 | -0.83 | 0.24  | 0.0218 |
| ILMN_1778977 | TYROBP       | -1.40 | 3.58E-10 | -1.63 | -1.17 | -0.45 | 0.0219 |
| ILMN_1798288 | MOBK12C      | 0.87  | 1.08E-09 | 0.67  | 1.07  | -0.41 | 0.0219 |
| ILMN_1762308 | LOC654191    | -0.95 | 4.15E-10 | -0.76 | -1.14 | 0.38  | 0.0219 |
| ILMN_1695422 | NCL          | 0.67  | 1.45E-08 | 0.84  | 0.49  | 0.34  | 0.0219 |
| ILMN_1750278 | FTHL12       | -0.76 | 1.35E-03 | -0.92 | -0.59 | -0.33 | 0.0222 |
| ILMN_1803745 | SUOX         | -0.72 | 3.93E-10 | -0.63 | -0.82 | 0.20  | 0.0222 |
| ILMN_1805750 | IFITM3       | 2.60  | 2.39E-14 | 2.21  | 2.99  | -0.78 | 0.0226 |
| ILMN_1756806 | MCL1         | 1.31  | 1.97E-17 | 1.15  | 1.47  | -0.31 | 0.0227 |

|              |           |       |          |       |       |       |        |
|--------------|-----------|-------|----------|-------|-------|-------|--------|
| ILMN_2374036 | CTSL1     | 2.17  | 5.55E-12 | 1.80  | 2.55  | -0.75 | 0.0230 |
| ILMN_1728478 | CXCL16    | -1.04 | 6.39E-04 | -1.42 | -0.66 | -0.76 | 0.0232 |
| ILMN_1675192 | IFNA21    | 1.29  | 2.40E-07 | 0.89  | 1.69  | -0.81 | 0.0232 |
| ILMN_1656501 | DUSP5     | 1.95  | 8.38E-15 | 1.71  | 2.19  | -0.48 | 0.0232 |
| ILMN_1780465 | CLEC5A    | -0.89 | 7.46E-03 | -1.34 | -0.44 | -0.89 | 0.0233 |
| ILMN_1854833 |           | -0.78 | 3.83E-19 | -0.69 | -0.88 | 0.19  | 0.0233 |
| ILMN_1804498 | C7orf27   | -0.80 | 1.05E-13 | -0.68 | -0.92 | 0.25  | 0.0234 |
| ILMN_1652082 | ELF4      | 0.91  | 7.96E-13 | 0.77  | 1.04  | -0.27 | 0.0234 |
| ILMN_2184640 | NOLC1     | 0.80  | 3.79E-14 | 0.92  | 0.67  | 0.24  | 0.0235 |
| ILMN_2098616 | C5orf39   | 0.82  | 3.75E-09 | 0.71  | 0.92  | -0.21 | 0.0237 |
| ILMN_1671142 | GPR68     | -0.89 | 1.91E-06 | -1.15 | -0.63 | -0.51 | 0.0237 |
| ILMN_1727709 | GPBAR1    | -0.79 | 7.20E-06 | -1.10 | -0.49 | -0.61 | 0.0238 |
| ILMN_1657857 | TMEM14C   | -0.60 | 2.48E-08 | -0.46 | -0.74 | 0.28  | 0.0239 |
| ILMN_1690392 | COMMD3    | -0.68 | 2.46E-16 | -0.57 | -0.79 | 0.22  | 0.0240 |
| ILMN_1913060 |           | -0.82 | 3.63E-07 | -1.05 | -0.59 | -0.46 | 0.0242 |
| ILMN_1737498 | MLKL      | 1.07  | 2.16E-17 | 0.94  | 1.20  | -0.26 | 0.0246 |
| ILMN_1772218 | HLA-DPA1  | -1.01 | 1.89E-08 | -1.22 | -0.81 | -0.41 | 0.0246 |
| ILMN_1780057 | RENBP     | -1.06 | 4.68E-10 | -1.23 | -0.90 | -0.34 | 0.0247 |
| ILMN_1671482 | GALM      | 1.22  | 1.05E-19 | 1.11  | 1.32  | -0.21 | 0.0248 |
| ILMN_2158713 | IL1F9     | 2.37  | 8.53E-15 | 2.02  | 2.71  | -0.70 | 0.0249 |
| ILMN_1665235 | CRTAP     | -0.95 | 6.21E-13 | -0.78 | -1.11 | 0.34  | 0.0249 |
| ILMN_1788961 | PPP2R2A   | 0.85  | 2.02E-14 | 0.75  | 0.95  | -0.20 | 0.0250 |
| ILMN_1693410 | BRI3BP    | -1.04 | 2.47E-16 | -0.88 | -1.20 | 0.32  | 0.0251 |
| ILMN_2094061 | IMPA2     | -1.80 | 6.18E-15 | -1.53 | -2.06 | 0.52  | 0.0251 |
| ILMN_1809086 | XRN1      | 1.46  | 1.07E-17 | 1.34  | 1.57  | -0.23 | 0.0254 |
| ILMN_2296950 | APOBEC3F  | 0.60  | 4.14E-08 | 0.48  | 0.71  | -0.22 | 0.0255 |
| ILMN_1734833 | NBN       | 1.24  | 7.10E-13 | 1.02  | 1.45  | -0.43 | 0.0256 |
| ILMN_1666269 | CTSZ      | -0.90 | 1.79E-04 | -1.27 | -0.54 | -0.72 | 0.0260 |
| ILMN_1786976 | RAB22A    | -0.64 | 3.34E-13 | -0.53 | -0.75 | 0.22  | 0.0260 |
| ILMN_1735827 | NISCH     | -1.01 | 5.78E-11 | -0.80 | -1.23 | 0.43  | 0.0262 |
| ILMN_1741159 | MAP3K8    | 1.33  | 9.08E-13 | 1.10  | 1.55  | -0.45 | 0.0262 |
| ILMN_1731181 | TEX2      | -0.63 | 3.18E-11 | -0.50 | -0.76 | 0.26  | 0.0262 |
| ILMN_1659960 | IL4I1     | 1.02  | 2.36E-03 | 0.52  | 1.53  | -1.01 | 0.0262 |
| ILMN_2400922 | OPRL1     | -0.75 | 4.73E-11 | -0.60 | -0.90 | 0.31  | 0.0263 |
| ILMN_1774974 | CLUAP1    | 0.69  | 5.11E-15 | 0.79  | 0.59  | 0.21  | 0.0269 |
| ILMN_1736585 | TMED10    | -0.67 | 2.06E-11 | -0.52 | -0.81 | 0.29  | 0.0271 |
| ILMN_1915076 |           | -0.75 | 1.07E-11 | -0.63 | -0.86 | 0.23  | 0.0271 |
| ILMN_1687768 | NCOA7     | 1.72  | 1.19E-23 | 1.55  | 1.88  | -0.32 | 0.0272 |
| ILMN_2203271 | FPR3      | -1.96 | 7.65E-08 | -2.44 | -1.48 | -0.96 | 0.0272 |
| ILMN_1767685 | SERPINB7  | 0.91  | 4.43E-11 | 0.71  | 1.11  | -0.39 | 0.0272 |
| ILMN_1777461 | CCR2      | -0.90 | 3.97E-11 | -0.72 | -1.09 | 0.37  | 0.0273 |
| ILMN_1676515 | IMPDH1    | -1.26 | 4.57E-11 | -1.04 | -1.48 | 0.44  | 0.0274 |
| ILMN_1766054 | ABCA1     | -0.92 | 1.45E-03 | -1.34 | -0.50 | -0.85 | 0.0276 |
| ILMN_2393573 | RASSF1    | -0.61 | 4.57E-11 | -0.51 | -0.71 | 0.20  | 0.0284 |
| ILMN_1689160 | DPEP2     | -1.50 | 6.71E-12 | -1.30 | -1.71 | 0.42  | 0.0286 |
| ILMN_3278170 | LOC441455 | 0.88  | 6.62E-14 | 1.00  | 0.76  | 0.24  | 0.0287 |
| ILMN_1793384 | JAK1      | 0.59  | 1.43E-10 | 0.72  | 0.46  | 0.26  | 0.0290 |
| ILMN_2178088 | ZNF131    | -0.67 | 3.20E-12 | -0.55 | -0.80 | 0.25  | 0.0291 |
| ILMN_1670870 | ALCAM     | -0.93 | 3.69E-07 | -1.16 | -0.71 | -0.45 | 0.0292 |
| ILMN_3246273 | RNU1-3    | 0.99  | 1.17E-07 | 0.76  | 1.21  | -0.45 | 0.0293 |
| ILMN_1813338 | LAG3      | 3.54  | 3.36E-18 | 3.40  | 3.68  | -0.28 | 0.0294 |
| ILMN_1757343 | PABPC4    | -0.64 | 7.25E-13 | -0.52 | -0.76 | 0.24  | 0.0294 |
| ILMN_1669674 | CNPY3     | -0.72 | 1.69E-09 | -0.52 | -0.92 | 0.40  | 0.0298 |
| ILMN_1666364 | COQ10A    | -1.70 | 1.18E-16 | -1.46 | -1.94 | 0.48  | 0.0303 |
| ILMN_1670130 | ARID3A    | -0.81 | 3.36E-12 | -0.92 | -0.69 | -0.23 | 0.0304 |
| ILMN_1720048 | CCL2      | 4.87  | 4.38E-18 | 4.26  | 5.48  | -1.22 | 0.0305 |
| ILMN_2368318 | FGR       | -0.67 | 1.69E-02 | -0.99 | -0.35 | -0.64 | 0.0306 |
| ILMN_1674034 | H2AFY     | -1.56 | 4.96E-15 | -1.35 | -1.78 | 0.43  | 0.0306 |
| ILMN_2151739 | CAT       | -0.70 | 2.05E-07 | -0.54 | -0.85 | 0.31  | 0.0307 |
| ILMN_1682928 | CPVL      | -2.30 | 1.17E-12 | -1.90 | -2.70 | 0.80  | 0.0309 |
| ILMN_1679809 | GSTP1     | -0.90 | 4.78E-11 | -0.74 | -1.07 | 0.34  | 0.0309 |
| ILMN_2100209 | CCL4L1    | 2.09  | 3.08E-06 | 1.60  | 2.57  | -0.97 | 0.0309 |
| ILMN_1711516 | ATP6V1A   | -0.82 | 3.25E-10 | -0.94 | -0.70 | -0.25 | 0.0310 |
| ILMN_1701789 | IFIT3     | 4.32  | 1.07E-20 | 3.90  | 4.73  | -0.84 | 0.0310 |
| ILMN_1762725 | EIF3L     | -1.16 | 3.60E-22 | -1.06 | -1.27 | 0.22  | 0.0311 |
| ILMN_2120022 | ARL5B     | 0.87  | 4.19E-09 | 0.66  | 1.09  | -0.43 | 0.0313 |
| ILMN_1711838 | SLC25A24  | 1.98  | 2.25E-15 | 1.70  | 2.26  | -0.56 | 0.0314 |
| ILMN_1701906 | CD300C    | -0.67 | 8.24E-05 | -0.82 | -0.51 | -0.31 | 0.0316 |
| ILMN_2087692 | CYBRD1    | -1.42 | 1.09E-10 | -1.14 | -1.69 | 0.55  | 0.0316 |
| ILMN_1675191 | GAPT      | -1.88 | 1.25E-11 | -1.52 | -2.24 | 0.72  | 0.0318 |
| ILMN_1800512 | HMOX1     | -1.59 | 8.64E-12 | -1.78 | -1.40 | -0.38 | 0.0321 |
| ILMN_3301372 | LOC730167 | 0.78  | 2.62E-12 | 0.65  | 0.90  | -0.25 | 0.0323 |
| ILMN_3240220 | RNU1F1    | 0.60  | 1.49E-07 | 0.44  | 0.77  | -0.33 | 0.0325 |
| ILMN_1657892 | TLR8      | -1.77 | 5.98E-09 | -2.11 | -1.43 | -0.68 | 0.0326 |

|              |              |       |          |       |       |       |        |
|--------------|--------------|-------|----------|-------|-------|-------|--------|
| ILMN_1681301 | AIM2         | 1.69  | 5.31E-14 | 1.48  | 1.90  | -0.43 | 0.0328 |
| ILMN_1771385 | GBP4         | 2.21  | 2.23E-12 | 1.87  | 2.56  | -0.70 | 0.0329 |
| ILMN_1676289 | NCAM1        | 0.63  | 4.14E-08 | 0.48  | 0.79  | -0.31 | 0.0329 |
| ILMN_1744517 | GNS          | -1.10 | 5.35E-12 | -1.24 | -0.97 | -0.27 | 0.0330 |
| ILMN_1673352 | IFITM2       | 1.78  | 4.74E-16 | 1.56  | 2.00  | -0.44 | 0.0331 |
| ILMN_1687301 | VCAN         | -1.64 | 8.07E-08 | -1.26 | -2.01 | 0.74  | 0.0332 |
| ILMN_1752285 | RPL4         | -0.63 | 7.51E-10 | -0.52 | -0.74 | 0.22  | 0.0333 |
| ILMN_1722492 | DUSP19       | 1.11  | 8.10E-07 | 0.81  | 1.41  | -0.61 | 0.0333 |
| ILMN_2194828 | C16orf53     | -1.05 | 4.21E-20 | -0.93 | -1.16 | 0.23  | 0.0334 |
| ILMN_1724837 | ZC3HAV1      | 1.35  | 2.67E-21 | 1.22  | 1.49  | -0.27 | 0.0334 |
| ILMN_1658885 | DAGLB        | -1.09 | 9.68E-12 | -0.95 | -1.24 | 0.29  | 0.0335 |
| ILMN_1781001 | SOCS3        | 1.06  | 2.30E-10 | 0.87  | 1.25  | -0.38 | 0.0339 |
| ILMN_3236653 | RNU1-5       | 1.18  | 2.06E-08 | 0.92  | 1.44  | -0.52 | 0.0339 |
| ILMN_2185884 | DHRS4        | -0.98 | 3.38E-13 | -0.85 | -1.11 | 0.26  | 0.0340 |
| ILMN_2376455 | CSF2RA       | -0.74 | 2.18E-04 | -0.95 | -0.54 | -0.41 | 0.0347 |
| ILMN_3235755 | LOC728830    | 1.60  | 1.93E-06 | 1.10  | 2.09  | -0.98 | 0.0349 |
| ILMN_2170814 | LAMP3        | 2.96  | 2.83E-22 | 3.21  | 2.71  | 0.49  | 0.0350 |
| ILMN_2359742 | CTSB         | -1.75 | 2.07E-08 | -2.01 | -1.48 | -0.53 | 0.0350 |
| ILMN_2038775 | TUBB2A       | 0.59  | 8.10E-07 | 0.43  | 0.74  | -0.30 | 0.0352 |
| ILMN_2248970 | OAS2         | 2.16  | 2.64E-23 | 2.03  | 2.29  | -0.27 | 0.0353 |
| ILMN_1676372 | CD209        | -0.70 | 4.39E-04 | -1.00 | -0.39 | -0.61 | 0.0354 |
| ILMN_2112256 | TNFRSF4      | 0.66  | 1.28E-04 | 0.44  | 0.88  | -0.44 | 0.0355 |
| ILMN_2412172 | APOBEC3F     | 0.93  | 7.32E-14 | 0.82  | 1.05  | -0.23 | 0.0355 |
| ILMN_1777663 | TOP2B        | -0.64 | 2.09E-12 | -0.54 | -0.74 | 0.21  | 0.0355 |
| ILMN_1701613 | RARRES3      | 0.99  | 1.75E-10 | 0.87  | 1.11  | -0.24 | 0.0355 |
| ILMN_1737580 | PPPDE2       | 0.81  | 6.50E-07 | 0.64  | 0.99  | -0.35 | 0.0356 |
| ILMN_1674985 | TMEM51       | -1.47 | 7.56E-08 | -1.74 | -1.21 | -0.53 | 0.0356 |
| ILMN_2325337 | APOL2        | 0.81  | 3.93E-12 | 0.68  | 0.93  | -0.25 | 0.0356 |
| ILMN_1727271 | WARS         | 1.62  | 5.23E-08 | 1.29  | 1.95  | -0.66 | 0.0359 |
| ILMN_1674706 | MTHFD2       | 0.94  | 6.07E-09 | 0.77  | 1.11  | -0.35 | 0.0359 |
| ILMN_1667825 | MLKL         | 1.13  | 9.91E-15 | 0.99  | 1.28  | -0.29 | 0.0361 |
| ILMN_1697544 | SLC25A29     | -0.59 | 1.30E-11 | -0.49 | -0.69 | 0.20  | 0.0362 |
| ILMN_2175131 | TMEM14C      | -1.21 | 1.10E-11 | -1.04 | -1.37 | 0.33  | 0.0364 |
| ILMN_1660195 | IFNA5        | 0.76  | 2.54E-05 | 0.48  | 1.04  | -0.57 | 0.0364 |
| ILMN_1679620 | LOC728519    | -0.88 | 1.18E-08 | -0.70 | -1.05 | 0.35  | 0.0365 |
| ILMN_2355042 | CLUAP1       | 0.82  | 8.43E-14 | 0.91  | 0.72  | 0.18  | 0.0366 |
| ILMN_2392043 | SPI1         | -1.54 | 1.78E-07 | -1.82 | -1.25 | -0.57 | 0.0367 |
| ILMN_1814213 | PQLC3        | -0.66 | 7.33E-12 | -0.53 | -0.80 | 0.27  | 0.0369 |
| ILMN_2282641 | TBXAS1       | -2.99 | 6.82E-22 | -2.76 | -3.22 | 0.46  | 0.0372 |
| ILMN_2067890 | CXCL11       | 0.96  | 7.41E-04 | 0.56  | 1.37  | -0.81 | 0.0373 |
| ILMN_1749662 | GPX1         | -2.16 | 3.54E-17 | -2.32 | -2.00 | -0.32 | 0.0377 |
| ILMN_1704056 | RPPH1        | 0.62  | 2.47E-06 | 0.45  | 0.79  | -0.34 | 0.0379 |
| ILMN_1787718 | SLC27A1      | -1.24 | 3.89E-12 | -1.01 | -1.46 | 0.44  | 0.0380 |
| ILMN_1761981 | FAM96A       | -1.04 | 1.18E-20 | -0.93 | -1.15 | 0.22  | 0.0381 |
| ILMN_1776967 | LRRRC50      | 0.89  | 8.28E-06 | 0.60  | 1.18  | -0.58 | 0.0387 |
| ILMN_2355462 | CYFIP1       | -1.85 | 3.58E-14 | -2.04 | -1.67 | -0.37 | 0.0388 |
| ILMN_1747673 | RASL10A      | -0.64 | 4.79E-08 | -0.48 | -0.80 | 0.32  | 0.0388 |
| ILMN_3242271 | GAPT         | -1.63 | 5.25E-11 | -1.31 | -1.95 | 0.64  | 0.0388 |
| ILMN_1727567 | OLIG2        | 0.84  | 3.33E-04 | 0.52  | 1.16  | -0.64 | 0.0389 |
| ILMN_1737394 | LMNA         | -1.15 | 3.44E-09 | -1.34 | -0.96 | -0.39 | 0.0390 |
| ILMN_1748904 | WTAP         | 0.64  | 1.08E-07 | 0.53  | 0.75  | -0.22 | 0.0390 |
| ILMN_1802106 | APOBEC3G     | 1.18  | 4.56E-15 | 1.05  | 1.30  | -0.25 | 0.0391 |
| ILMN_1694106 | GPD1L        | -0.71 | 2.24E-09 | -0.58 | -0.84 | 0.26  | 0.0392 |
| ILMN_2173835 | FTHL3        | -0.79 | 2.43E-03 | -0.94 | -0.64 | -0.30 | 0.0392 |
| ILMN_1745374 | IFI35        | 2.32  | 1.01E-20 | 2.11  | 2.54  | -0.43 | 0.0392 |
| ILMN_1795991 | C22orf28     | 1.32  | 3.19E-15 | 1.18  | 1.45  | -0.27 | 0.0392 |
| ILMN_1653432 | HNRPD        | 0.94  | 1.92E-10 | 1.07  | 0.80  | 0.27  | 0.0392 |
| ILMN_1695404 | LY6E         | 2.38  | 1.71E-21 | 2.16  | 2.59  | -0.43 | 0.0394 |
| ILMN_3259146 | LOC100129681 | 1.50  | 6.35E-10 | 1.36  | 1.63  | -0.28 | 0.0398 |
| ILMN_1659936 | PPP1R15A     | 1.23  | 3.58E-10 | 1.01  | 1.44  | -0.43 | 0.0399 |
| ILMN_1655191 | CASZ1        | 0.91  | 1.88E-12 | 0.77  | 1.05  | -0.28 | 0.0400 |
| ILMN_1706013 | FTHL11       | -0.73 | 6.59E-04 | -0.87 | -0.59 | -0.28 | 0.0404 |
| ILMN_1723035 | OLR1         | -1.45 | 1.19E-03 | -1.81 | -1.10 | -0.71 | 0.0405 |
| ILMN_1810978 | MUCL1        | 0.96  | 4.39E-07 | 0.68  | 1.24  | -0.56 | 0.0405 |
| ILMN_1659761 | SNX29        | -0.90 | 6.06E-14 | -0.77 | -1.03 | 0.26  | 0.0406 |
| ILMN_3240740 | EIF3L        | -0.94 | 8.18E-25 | -0.85 | -1.02 | 0.17  | 0.0408 |
| ILMN_3240594 | RNU4ATAC     | 0.88  | 1.03E-13 | 0.73  | 1.02  | -0.29 | 0.0409 |
| ILMN_1769734 | NT5C3        | 3.13  | 1.55E-26 | 2.99  | 3.26  | -0.26 | 0.0411 |
| ILMN_3302919 | MYOF         | -0.66 | 2.38E-02 | -1.00 | -0.32 | -0.68 | 0.0412 |
| ILMN_1712305 | CYBRD1       | -1.19 | 9.60E-10 | -0.94 | -1.43 | 0.50  | 0.0413 |
| ILMN_1730084 | COMT         | -0.93 | 8.22E-10 | -0.81 | -1.04 | 0.22  | 0.0417 |
| ILMN_1676014 | LOC728635    | -0.59 | 6.24E-07 | -0.48 | -0.71 | 0.23  | 0.0419 |
| ILMN_3244646 | RNU1G2       | 0.99  | 1.09E-07 | 0.76  | 1.22  | -0.46 | 0.0421 |
| ILMN_3205162 | LOC646688    | -0.88 | 1.10E-09 | -0.75 | -1.00 | 0.25  | 0.0423 |

|              |              |       |          |       |       |       |        |
|--------------|--------------|-------|----------|-------|-------|-------|--------|
| ILMN_1742332 | KCTD12       | -0.64 | 4.20E-02 | -0.98 | -0.31 | -0.67 | 0.0424 |
| ILMN_1708721 | RABGAP1L     | 0.71  | 5.71E-14 | 0.61  | 0.81  | -0.20 | 0.0424 |
| ILMN_1758731 | CYP2J2       | 1.97  | 2.97E-22 | 2.12  | 1.81  | 0.31  | 0.0424 |
| ILMN_1666502 | SOBP         | 0.80  | 5.45E-18 | 0.90  | 0.70  | 0.20  | 0.0426 |
| ILMN_1797793 | BLVRB        | -1.03 | 1.83E-10 | -0.87 | -1.19 | 0.32  | 0.0426 |
| ILMN_2157441 | HLA-DRA      | -0.69 | 1.67E-06 | -0.85 | -0.52 | -0.34 | 0.0430 |
| ILMN_2372974 | SIRPA        | -0.95 | 1.31E-06 | -1.14 | -0.76 | -0.38 | 0.0440 |
| ILMN_1708375 | IRF1         | 0.62  | 8.88E-05 | 0.40  | 0.83  | -0.43 | 0.0444 |
| ILMN_1732923 | SIPA1L2      | -0.69 | 5.78E-05 | -0.85 | -0.52 | -0.33 | 0.0444 |
| ILMN_1725700 | MOV10        | 1.73  | 9.69E-25 | 1.62  | 1.84  | -0.22 | 0.0445 |
| ILMN_1796216 | VASH1        | -1.18 | 1.54E-10 | -1.00 | -1.36 | 0.36  | 0.0448 |
| ILMN_1747436 | SCML4        | 0.85  | 3.17E-15 | 0.94  | 0.75  | 0.19  | 0.0449 |
| ILMN_1802653 | EBI3         | 2.73  | 2.35E-17 | 2.45  | 3.00  | -0.55 | 0.0450 |
| ILMN_1769520 | UBE2L6       | 1.14  | 1.30E-13 | 0.96  | 1.32  | -0.36 | 0.0452 |
| ILMN_1683146 | FTH1         | -0.85 | 4.38E-04 | -1.05 | -0.65 | -0.40 | 0.0456 |
| ILMN_3300663 | LOC728661    | -0.65 | 1.30E-07 | -0.53 | -0.77 | 0.23  | 0.0457 |
| ILMN_1668374 | ITGB5        | -1.08 | 8.51E-10 | -0.86 | -1.29 | 0.43  | 0.0461 |
| ILMN_1792473 | AIF1         | -2.85 | 7.96E-16 | -3.14 | -2.56 | -0.57 | 0.0462 |
| ILMN_2341467 | PARL         | -0.59 | 2.41E-11 | -0.49 | -0.70 | 0.20  | 0.0462 |
| ILMN_1657435 | MT1M         | 1.41  | 1.18E-05 | 0.99  | 1.83  | -0.85 | 0.0465 |
| ILMN_1696463 | SPI1         | -1.40 | 4.99E-09 | -1.63 | -1.17 | -0.46 | 0.0466 |
| ILMN_1741727 | QPCT         | -1.06 | 1.13E-05 | -1.30 | -0.82 | -0.48 | 0.0468 |
| ILMN_1736863 | TMEM140      | 1.94  | 2.69E-19 | 1.80  | 2.08  | -0.29 | 0.0468 |
| ILMN_1800912 | ZFP106       | -0.71 | 1.38E-13 | -0.60 | -0.82 | 0.23  | 0.0470 |
| ILMN_1781761 | ENPP4        | 0.77  | 9.28E-11 | 0.68  | 0.86  | -0.18 | 0.0470 |
| ILMN_1800733 | MANBA        | -1.20 | 9.49E-13 | -1.05 | -1.34 | 0.29  | 0.0471 |
| ILMN_2415303 | CLEC10A      | -1.42 | 2.23E-11 | -1.17 | -1.68 | 0.51  | 0.0471 |
| ILMN_1729973 | ZC3HAV1      | 1.28  | 6.69E-18 | 1.14  | 1.41  | -0.28 | 0.0471 |
| ILMN_1656676 | ZYG11B       | -0.94 | 9.47E-12 | -0.80 | -1.08 | 0.28  | 0.0473 |
| ILMN_1740633 | PRF1         | 1.65  | 2.06E-09 | 1.47  | 1.83  | -0.36 | 0.0474 |
| ILMN_1711493 | PRAM1        | -1.09 | 1.14E-10 | -0.92 | -1.26 | 0.34  | 0.0475 |
| ILMN_1731745 | NINJ2        | -1.01 | 2.16E-11 | -0.86 | -1.15 | 0.30  | 0.0479 |
| ILMN_1661196 | CSF2RA       | -0.75 | 3.12E-04 | -0.94 | -0.55 | -0.39 | 0.0479 |
| ILMN_1798270 | C11orf75     | -1.37 | 1.29E-07 | -1.66 | -1.08 | -0.58 | 0.0479 |
| ILMN_1745148 | ZNFX1        | 1.98  | 6.88E-26 | 1.86  | 2.09  | -0.23 | 0.0481 |
| ILMN_1689655 | HLA-DRA      | -0.91 | 4.82E-08 | -1.08 | -0.74 | -0.34 | 0.0487 |
| ILMN_1699331 | IFIT1        | 2.32  | 1.75E-22 | 2.13  | 2.51  | -0.38 | 0.0488 |
| ILMN_1787127 | SLC43A2      | -0.80 | 1.06E-02 | -1.06 | -0.54 | -0.52 | 0.0488 |
| ILMN_1738677 | PRPF8        | -0.65 | 7.75E-10 | -0.52 | -0.78 | 0.26  | 0.0491 |
| ILMN_1696911 | FTHL8        | -0.85 | 1.52E-03 | -1.04 | -0.66 | -0.38 | 0.0492 |
| ILMN_2188333 | CD69         | 2.08  | 1.28E-19 | 1.90  | 2.25  | -0.35 | 0.0493 |
| ILMN_1685005 | TNFRSF1A     | -1.33 | 5.51E-12 | -1.50 | -1.16 | -0.34 | 0.0501 |
| ILMN_1674038 | CTSD         | -1.02 | 4.56E-07 | -1.25 | -0.80 | -0.45 | 0.0501 |
| ILMN_1710726 | APOBEC3F     | 0.79  | 3.77E-17 | 0.71  | 0.87  | -0.16 | 0.0508 |
| ILMN_2149494 | NPL          | -1.37 | 4.37E-08 | -1.62 | -1.11 | -0.51 | 0.0509 |
| ILMN_1860051 |              | 0.98  | 2.06E-14 | 0.84  | 1.11  | -0.28 | 0.0511 |
| ILMN_1733559 | LOC100008589 | -1.03 | 2.27E-13 | -1.19 | -0.88 | -0.31 | 0.0516 |
| ILMN_3227315 | LOC729009    | -0.80 | 6.75E-03 | -0.96 | -0.63 | -0.32 | 0.0518 |
| ILMN_1733998 | DHRS9        | -2.03 | 4.90E-11 | -2.35 | -1.71 | -0.63 | 0.0518 |
| ILMN_1704730 | CD93         | 0.84  | 6.17E-04 | 0.56  | 1.13  | -0.56 | 0.0519 |
| ILMN_1671891 | PID1         | -1.49 | 2.45E-05 | -1.17 | -1.80 | 0.64  | 0.0521 |
| ILMN_1746704 | TRIM8        | -0.85 | 3.90E-16 | -0.75 | -0.96 | 0.22  | 0.0524 |
| ILMN_1804415 | SMAGP        | 0.65  | 7.00E-11 | 0.54  | 0.76  | -0.22 | 0.0528 |
| ILMN_1734205 | RASSF1       | -0.73 | 7.42E-13 | -0.62 | -0.84 | 0.22  | 0.0532 |
| ILMN_1764228 | DAB2         | -1.14 | 3.35E-07 | -1.33 | -0.95 | -0.38 | 0.0536 |
| ILMN_1705469 | RDH14        | 0.72  | 6.00E-17 | 0.80  | 0.64  | 0.16  | 0.0538 |
| ILMN_2149624 | IL29         | 0.71  | 1.26E-05 | 0.47  | 0.94  | -0.47 | 0.0538 |
| ILMN_1785646 | PMP22        | -1.13 | 4.86E-05 | -1.41 | -0.84 | -0.57 | 0.0539 |
| ILMN_2233783 | CD38         | 2.97  | 1.49E-19 | 2.71  | 3.23  | -0.52 | 0.0539 |
| ILMN_1708779 | GNLY         | 1.04  | 6.25E-05 | 0.85  | 1.22  | -0.37 | 0.0540 |
| ILMN_1795118 | SIDT1        | 1.06  | 3.31E-20 | 1.15  | 0.97  | 0.18  | 0.0544 |
| ILMN_1738675 | PTPN6        | -0.60 | 8.65E-08 | -0.71 | -0.49 | -0.22 | 0.0549 |
| ILMN_1676891 | CDC2L6       | -0.78 | 3.92E-14 | -0.69 | -0.88 | 0.19  | 0.0550 |
| ILMN_1815205 | LYZ          | -3.92 | 8.18E-16 | -4.28 | -3.56 | -0.72 | 0.0550 |
| ILMN_2115490 | NBPF20       | -0.84 | 5.32E-08 | -0.69 | -0.98 | 0.29  | 0.0561 |
| ILMN_1657234 | CCL20        | 2.39  | 5.57E-15 | 2.10  | 2.68  | -0.59 | 0.0561 |
| ILMN_1794165 | PGD          | -0.59 | 6.36E-03 | -0.80 | -0.38 | -0.42 | 0.0563 |
| ILMN_3242586 | RHOU         | -1.15 | 5.70E-06 | -1.39 | -0.91 | -0.48 | 0.0566 |
| ILMN_1669062 | CCR2         | -1.67 | 1.96E-12 | -1.40 | -1.94 | 0.54  | 0.0568 |
| ILMN_2208903 | CD52         | -1.41 | 2.96E-17 | -1.25 | -1.56 | 0.31  | 0.0574 |
| ILMN_1677396 | NDFIP2       | 0.62  | 2.39E-06 | 0.45  | 0.79  | -0.34 | 0.0575 |
| ILMN_2333774 | TAGAP        | 0.67  | 5.87E-11 | 0.54  | 0.81  | -0.27 | 0.0576 |
| ILMN_1782070 | NPL          | -1.41 | 1.20E-09 | -1.64 | -1.18 | -0.46 | 0.0578 |
| ILMN_2207291 | IFNG         | 4.03  | 8.21E-12 | 3.39  | 4.67  | -1.28 | 0.0578 |



|              |           |       |          |       |       |       |        |
|--------------|-----------|-------|----------|-------|-------|-------|--------|
| ILMN_2376108 | PSMB9     | 1.28  | 2.93E-13 | 1.14  | 1.42  | -0.28 | 0.0579 |
| ILMN_1781373 | IFIH1     | 2.08  | 3.59E-23 | 1.92  | 2.23  | -0.30 | 0.0580 |
| ILMN_1813430 | TRIM69    | 0.62  | 1.83E-13 | 0.53  | 0.71  | -0.19 | 0.0583 |
| ILMN_1659462 | DUSP23    | -0.72 | 7.24E-15 | -0.62 | -0.82 | 0.20  | 0.0583 |
| ILMN_1791771 | HCK       | -0.82 | 1.01E-03 | -1.06 | -0.58 | -0.48 | 0.0584 |
| ILMN_1795930 | PTGER4    | 1.07  | 9.01E-12 | 0.93  | 1.21  | -0.28 | 0.0585 |
| ILMN_1781010 | ARHGFE3   | 1.09  | 1.37E-13 | 1.00  | 1.18  | -0.18 | 0.0586 |
| ILMN_1676563 | HTRA1     | -1.11 | 5.89E-06 | -0.80 | -1.43 | 0.63  | 0.0589 |
| ILMN_2120273 | AP1S2     | -1.18 | 5.31E-13 | -1.06 | -1.30 | 0.24  | 0.0593 |
| ILMN_1721106 | C14orf159 | 0.92  | 7.33E-14 | 1.04  | 0.81  | 0.23  | 0.0595 |
| ILMN_1692219 | RAB11FIP1 | -1.03 | 1.86E-15 | -0.93 | -1.13 | 0.21  | 0.0596 |
| ILMN_1772645 | AGK       | 0.76  | 8.74E-17 | 0.68  | 0.84  | -0.17 | 0.0597 |
| ILMN_3251545 | CHMP5     | 1.20  | 4.29E-23 | 1.10  | 1.31  | -0.21 | 0.0602 |
| ILMN_2329429 | GIMAP6    | 1.22  | 3.55E-15 | 1.30  | 1.14  | 0.17  | 0.0602 |
| ILMN_1789171 | EEF2K     | -0.78 | 6.66E-14 | -0.67 | -0.89 | 0.22  | 0.0603 |
| ILMN_1728724 | IL17RA    | -0.62 | 5.42E-12 | -0.69 | -0.55 | -0.15 | 0.0608 |
| ILMN_1780132 | PELI2     | -0.65 | 4.84E-09 | -0.52 | -0.78 | 0.27  | 0.0620 |
| ILMN_2170353 | PTPLB     | -0.81 | 1.93E-10 | -0.71 | -0.92 | 0.21  | 0.0621 |
| ILMN_3239445 | ZBTB42    | 0.87  | 3.04E-17 | 0.77  | 0.96  | -0.19 | 0.0622 |
| ILMN_1659913 | ISG20     | 2.01  | 4.46E-22 | 1.87  | 2.15  | -0.28 | 0.0622 |
| ILMN_1806106 | GNL3      | 0.63  | 2.36E-11 | 0.73  | 0.53  | 0.21  | 0.0627 |
| ILMN_1662795 | CA2       | -2.00 | 1.03E-10 | -2.34 | -1.66 | -0.68 | 0.0632 |
| ILMN_1761147 | GABPB2    | 0.72  | 9.02E-14 | 0.63  | 0.81  | -0.18 | 0.0633 |
| ILMN_2057573 | FAM62B    | -0.86 | 7.54E-09 | -0.75 | -0.97 | 0.22  | 0.0636 |
| ILMN_1804396 | C14orf4   | -1.14 | 1.26E-11 | -1.28 | -1.00 | -0.28 | 0.0637 |
| ILMN_1803254 | KIAA2010  | 0.64  | 1.28E-14 | 0.75  | 0.53  | 0.22  | 0.0640 |
| ILMN_2405521 | MTHFD2    | 1.21  | 3.96E-11 | 1.05  | 1.37  | -0.32 | 0.0641 |
| ILMN_1789830 | CFLAR     | 1.06  | 1.80E-11 | 0.91  | 1.21  | -0.30 | 0.0645 |
| ILMN_2066858 | TNFSF13B  | 0.91  | 9.24E-09 | 0.71  | 1.11  | -0.40 | 0.0648 |
| ILMN_1757388 | OCEL1     | -0.61 | 6.80E-07 | -0.46 | -0.75 | 0.29  | 0.0654 |
| ILMN_2415979 | KIAA1751  | 0.93  | 5.67E-06 | 0.73  | 1.13  | -0.40 | 0.0658 |
| ILMN_1707503 | C1orf144  | 1.17  | 3.19E-17 | 1.06  | 1.28  | -0.21 | 0.0668 |
| ILMN_1751956 | MGST3     | -0.67 | 1.09E-07 | -0.78 | -0.57 | -0.21 | 0.0668 |
| ILMN_3240117 | AIDA      | 0.96  | 2.22E-15 | 0.88  | 1.05  | -0.17 | 0.0684 |
| ILMN_1766713 | HSPD1     | 0.74  | 1.57E-09 | 0.88  | 0.60  | 0.28  | 0.0686 |
| ILMN_1782560 | CD86      | -0.62 | 6.02E-03 | -0.83 | -0.41 | -0.42 | 0.0688 |
| ILMN_1799725 | DOCK2     | -0.74 | 1.56E-12 | -0.64 | -0.84 | 0.20  | 0.0688 |
| ILMN_1747195 | PSMB8     | 0.75  | 5.35E-12 | 0.65  | 0.84  | -0.19 | 0.0689 |
| ILMN_1752579 | ATP6V0A1  | -2.13 | 5.00E-20 | -2.27 | -2.00 | -0.26 | 0.0690 |
| ILMN_3242315 | SNORD3D   | 0.81  | 4.52E-08 | 0.64  | 0.97  | -0.33 | 0.0697 |
| ILMN_1730568 | ZDHHC7    | -0.95 | 6.18E-14 | -0.84 | -1.06 | 0.22  | 0.0698 |
| ILMN_1758418 | TNFSF13B  | 1.12  | 6.40E-10 | 0.90  | 1.34  | -0.44 | 0.0698 |
| ILMN_3244457 | EHBP1L1   | -0.76 | 6.04E-08 | -0.92 | -0.59 | -0.33 | 0.0701 |
| ILMN_2338197 | LINS1     | 0.94  | 1.37E-14 | 1.02  | 0.87  | 0.15  | 0.0703 |
| ILMN_1764380 | GLTP      | -0.61 | 2.10E-14 | -0.54 | -0.69 | 0.15  | 0.0711 |
| ILMN_1672661 | SP110     | 1.58  | 6.01E-15 | 1.47  | 1.69  | -0.21 | 0.0712 |
| ILMN_1798256 | UPP1      | 0.92  | 1.94E-07 | 0.73  | 1.11  | -0.38 | 0.0722 |
| ILMN_1653026 | PLAC8     | 1.59  | 1.74E-15 | 1.47  | 1.72  | -0.25 | 0.0728 |
| ILMN_2366330 | FERMT3    | -0.73 | 4.95E-06 | -0.87 | -0.59 | -0.29 | 0.0728 |
| ILMN_2384139 | KLRC1     | 0.76  | 5.81E-06 | 0.61  | 0.91  | -0.31 | 0.0736 |
| ILMN_1761159 | ESYT1     | -1.08 | 3.30E-11 | -0.95 | -1.21 | 0.26  | 0.0737 |
| ILMN_1672503 | DPYSL2    | -1.34 | 3.45E-14 | -1.47 | -1.22 | -0.26 | 0.0738 |
| ILMN_1689518 | PECAM1    | -1.80 | 1.90E-11 | -1.55 | -2.05 | 0.50  | 0.0739 |
| ILMN_2222234 | PRDX4     | 0.66  | 3.30E-10 | 0.77  | 0.55  | 0.22  | 0.0740 |
| ILMN_2388547 | EPST11    | 2.45  | 7.72E-17 | 2.20  | 2.70  | -0.50 | 0.0740 |
| ILMN_2353642 | ATP6V0B   | -0.81 | 3.28E-08 | -0.93 | -0.69 | -0.24 | 0.0742 |
| ILMN_1745806 | PEMT      | -0.69 | 4.06E-07 | -0.53 | -0.86 | 0.33  | 0.0743 |
| ILMN_1797372 | C3orf58   | -0.59 | 2.01E-11 | -0.49 | -0.68 | 0.19  | 0.0748 |
| ILMN_1740010 | PCNX      | 0.63  | 4.34E-10 | 0.49  | 0.76  | -0.26 | 0.0755 |
| ILMN_1651354 | SPP1      | 2.38  | 3.34E-08 | 1.90  | 2.85  | -0.95 | 0.0756 |
| ILMN_1721204 | CSF2RA    | -0.69 | 1.74E-08 | -0.80 | -0.59 | -0.22 | 0.0758 |
| ILMN_1660462 | MCOLN2    | 1.83  | 9.09E-13 | 1.67  | 1.99  | -0.31 | 0.0759 |
| ILMN_1801610 | METRNL    | 0.70  | 9.18E-06 | 0.57  | 0.84  | -0.28 | 0.0766 |
| ILMN_1718961 | BNIP3L    | -1.15 | 1.73E-14 | -1.04 | -1.27 | 0.24  | 0.0767 |
| ILMN_1666376 | TRIM56    | 0.81  | 4.87E-12 | 0.71  | 0.92  | -0.21 | 0.0775 |
| ILMN_1654542 | C5orf21   | -0.65 | 1.71E-18 | -0.57 | -0.72 | 0.15  | 0.0775 |
| ILMN_1813625 | TRIM25    | 1.74  | 8.40E-27 | 1.84  | 1.64  | 0.20  | 0.0777 |
| ILMN_1803652 | C9orf91   | 0.66  | 1.37E-09 | 0.54  | 0.78  | -0.24 | 0.0782 |
| ILMN_1756992 | MUC1      | 0.64  | 1.33E-09 | 0.53  | 0.76  | -0.23 | 0.0784 |
| ILMN_2101278 | RGS18     | -0.79 | 2.84E-04 | -0.65 | -0.93 | 0.28  | 0.0784 |
| ILMN_1765801 | GAA       | -0.85 | 5.88E-16 | -0.77 | -0.93 | 0.17  | 0.0793 |
| ILMN_1772627 | D4S234E   | -0.94 | 4.02E-08 | -0.82 | -1.06 | 0.24  | 0.0797 |
| ILMN_2239754 | IFIT3     | 4.90  | 3.87E-26 | 4.63  | 5.16  | -0.54 | 0.0800 |
| ILMN_1772731 | HAGH      | -0.64 | 2.66E-10 | -0.57 | -0.72 | 0.15  | 0.0804 |

|              |              |       |          |       |       |       |        |
|--------------|--------------|-------|----------|-------|-------|-------|--------|
| ILMN_1714364 | PTK2         | 0.92  | 5.27E-13 | 0.84  | 1.00  | -0.16 | 0.0805 |
| ILMN_3295494 | LOC389386    | 1.32  | 7.72E-10 | 1.08  | 1.57  | -0.49 | 0.0805 |
| ILMN_1702231 | C1orf54      | -1.79 | 5.37E-16 | -1.99 | -1.60 | -0.39 | 0.0807 |
| ILMN_1664644 | ATG16L2      | -0.67 | 7.15E-15 | -0.59 | -0.75 | 0.16  | 0.0810 |
| ILMN_1783593 | CCL13        | 1.08  | 1.18E-04 | 0.69  | 1.46  | -0.77 | 0.0810 |
| ILMN_3228688 | LOC730415    | -1.42 | 9.85E-12 | -1.58 | -1.25 | -0.33 | 0.0818 |
| ILMN_2366634 | PKM2         | -0.71 | 1.80E-05 | -0.85 | -0.58 | -0.27 | 0.0819 |
| ILMN_2404665 | TRIM5        | 1.59  | 1.80E-24 | 1.49  | 1.69  | -0.20 | 0.0823 |
| ILMN_1716678 | NPC2         | -0.84 | 1.43E-10 | -0.95 | -0.73 | -0.22 | 0.0823 |
| ILMN_1800951 | ATXN1        | -0.70 | 2.81E-12 | -0.60 | -0.80 | 0.20  | 0.0825 |
| ILMN_1721876 | TIMP2        | -2.58 | 3.16E-19 | -2.72 | -2.45 | -0.28 | 0.0828 |
| ILMN_3235853 | S1PR1        | -0.60 | 7.73E-05 | -0.50 | -0.70 | 0.20  | 0.0830 |
| ILMN_1774733 | SOCS1        | 2.28  | 1.79E-17 | 2.09  | 2.46  | -0.37 | 0.0830 |
| ILMN_2201533 | C17orf61     | -0.62 | 2.02E-13 | -0.54 | -0.71 | 0.17  | 0.0836 |
| ILMN_2374449 | SPP1         | 2.38  | 1.13E-08 | 1.92  | 2.85  | -0.93 | 0.0837 |
| ILMN_1796245 | DNASE2       | -0.66 | 1.10E-07 | -0.51 | -0.80 | 0.29  | 0.0844 |
| ILMN_2337655 | WARS         | 1.40  | 3.68E-07 | 1.13  | 1.68  | -0.55 | 0.0847 |
| ILMN_1760121 | RRAGC        | 0.70  | 2.63E-11 | 0.59  | 0.82  | -0.23 | 0.0850 |
| ILMN_1658494 | C13orf15     | -1.15 | 2.00E-08 | -1.35 | -0.94 | -0.41 | 0.0851 |
| ILMN_2384140 | KLRC1        | 1.03  | 3.94E-06 | 0.88  | 1.17  | -0.30 | 0.0853 |
| ILMN_1776778 | PARP15       | 0.71  | 1.21E-11 | 0.62  | 0.80  | -0.17 | 0.0857 |
| ILMN_1735014 | KLF6         | 0.73  | 1.40E-14 | 0.64  | 0.83  | -0.19 | 0.0861 |
| ILMN_1733680 | AZI2         | 0.84  | 3.28E-17 | 0.93  | 0.75  | 0.19  | 0.0864 |
| ILMN_1769810 | ARL6IP5      | -0.70 | 1.87E-11 | -0.61 | -0.80 | 0.19  | 0.0865 |
| ILMN_1660436 | HSPA1B       | 0.90  | 5.71E-07 | 0.78  | 1.02  | -0.24 | 0.0865 |
| ILMN_2319000 | MATK         | -0.99 | 9.78E-07 | -1.21 | -0.77 | -0.44 | 0.0866 |
| ILMN_1725417 | NELL2        | -0.90 | 9.56E-05 | -0.78 | -1.01 | 0.23  | 0.0870 |
| ILMN_1708604 | C7orf28A     | 0.59  | 8.29E-11 | 0.70  | 0.49  | 0.20  | 0.0871 |
| ILMN_2371280 | CSF3R        | -1.87 | 4.08E-09 | -1.62 | -2.13 | 0.51  | 0.0872 |
| ILMN_1688698 | ZEB2         | -0.69 | 1.04E-07 | -0.79 | -0.60 | -0.19 | 0.0874 |
| ILMN_1771800 | PRKCA        | -0.64 | 1.11E-06 | -0.71 | -0.57 | -0.14 | 0.0881 |
| ILMN_2394561 | IRF2BP2      | -0.63 | 5.26E-10 | -0.52 | -0.73 | 0.21  | 0.0885 |
| ILMN_2311166 | ITGB5        | -1.22 | 2.65E-10 | -1.02 | -1.41 | 0.39  | 0.0890 |
| ILMN_2390853 | CTSH         | -0.69 | 2.04E-04 | -0.86 | -0.51 | -0.35 | 0.0898 |
| ILMN_3253787 | LOC100128274 | 1.77  | 2.25E-21 | 1.63  | 1.90  | -0.26 | 0.0910 |
| ILMN_1756862 | APOL3        | 0.99  | 8.24E-09 | 0.81  | 1.17  | -0.35 | 0.0916 |
| ILMN_1746171 | H2AFY        | -1.11 | 2.60E-14 | -1.00 | -1.22 | 0.21  | 0.0918 |
| ILMN_1778136 | ZMYND15      | -1.49 | 1.77E-08 | -1.67 | -1.31 | -0.36 | 0.0925 |
| ILMN_2126706 | LMNB1        | 1.26  | 3.58E-14 | 1.12  | 1.41  | -0.29 | 0.0930 |
| ILMN_1845037 |              | 1.18  | 3.04E-12 | 1.08  | 1.28  | -0.20 | 0.0931 |
| ILMN_2121408 | HBEGF        | 0.79  | 2.74E-03 | 0.48  | 1.09  | -0.61 | 0.0933 |
| ILMN_1764383 | MCOLN1       | -1.12 | 7.04E-13 | -1.23 | -1.01 | -0.22 | 0.0933 |
| ILMN_2290118 | MEGF9        | -0.60 | 8.93E-13 | -0.53 | -0.68 | 0.16  | 0.0934 |
| ILMN_1726230 | CD1B         | -0.73 | 1.43E-02 | -1.06 | -0.40 | -0.66 | 0.0935 |
| ILMN_1682232 | MIER1        | 0.91  | 1.00E-13 | 0.83  | 0.99  | -0.16 | 0.0936 |
| ILMN_1781700 | IL18R1       | 0.65  | 4.66E-07 | 0.54  | 0.76  | -0.22 | 0.0939 |
| ILMN_1671583 | MKRN1        | 0.66  | 8.39E-12 | 0.74  | 0.58  | 0.15  | 0.0942 |
| ILMN_1726624 | YPEL4        | -0.78 | 1.79E-10 | -0.65 | -0.90 | 0.25  | 0.0944 |
| ILMN_1706531 | ABCC5        | -0.94 | 7.08E-13 | -0.84 | -1.05 | 0.21  | 0.0950 |
| ILMN_2347068 | MKNK2        | -0.67 | 1.37E-09 | -0.56 | -0.78 | 0.23  | 0.0952 |
| ILMN_1664920 | C19orf12     | 1.00  | 3.10E-12 | 0.87  | 1.13  | -0.26 | 0.0953 |
| ILMN_1683792 | LAP3         | 0.95  | 1.64E-06 | 0.72  | 1.18  | -0.47 | 0.0957 |
| ILMN_1761464 | CD74         | -0.68 | 3.64E-03 | -0.88 | -0.49 | -0.39 | 0.0962 |
| ILMN_1786847 | TGM3         | 0.67  | 3.69E-04 | 0.43  | 0.91  | -0.48 | 0.0963 |
| ILMN_2205963 | C10orf54     | -2.48 | 4.12E-22 | -2.30 | -2.65 | 0.35  | 0.0967 |
| ILMN_2347193 | GSDMB        | 1.01  | 5.02E-15 | 1.09  | 0.94  | 0.16  | 0.0968 |
| ILMN_1744795 | TBL1X        | -0.59 | 4.96E-09 | -0.50 | -0.68 | 0.18  | 0.0969 |
| ILMN_1865764 |              | -0.79 | 3.19E-15 | -0.72 | -0.86 | 0.14  | 0.0975 |
| ILMN_1803788 | LGALS3       | -0.69 | 2.25E-03 | -0.84 | -0.55 | -0.29 | 0.0975 |
| ILMN_1720373 | SLC7A5       | 1.89  | 2.02E-20 | 1.74  | 2.05  | -0.31 | 0.0978 |
| ILMN_1759460 | TAF7         | 0.61  | 3.62E-15 | 0.68  | 0.53  | 0.15  | 0.0978 |
| ILMN_1714397 | CRYL1        | -0.67 | 2.99E-12 | -0.56 | -0.77 | 0.20  | 0.0979 |
| ILMN_1765258 | HLA-E        | 0.60  | 3.59E-11 | 0.53  | 0.68  | -0.15 | 0.0981 |
| ILMN_1813379 | TNFRSF9      | 0.94  | 2.27E-06 | 0.81  | 1.07  | -0.26 | 0.0984 |
| ILMN_1773245 | CCL3L1       | 3.69  | 3.51E-10 | 3.14  | 4.25  | -1.10 | 0.0984 |
| ILMN_1790014 | METRNL       | 0.64  | 7.52E-05 | 0.50  | 0.78  | -0.28 | 0.0987 |
| ILMN_1735552 | KIF1B        | -0.72 | 1.58E-12 | -0.79 | -0.65 | -0.14 | 0.0990 |
| ILMN_1667030 | HSBP1        | -0.68 | 5.38E-11 | -0.59 | -0.78 | 0.19  | 0.0993 |
| ILMN_2059549 | SYK          | -1.20 | 1.73E-11 | -1.35 | -1.05 | -0.30 | 0.1000 |
| ILMN_1683178 | JAK2         | 0.98  | 1.35E-11 | 0.86  | 1.10  | -0.24 | 0.1002 |
| ILMN_1807825 | LY86         | -0.65 | 5.19E-04 | -0.47 | -0.83 | 0.36  | 0.1008 |
| ILMN_1684887 | SAMSN1       | 0.98  | 1.40E-10 | 0.85  | 1.12  | -0.27 | 0.1013 |
| ILMN_1771627 | ZMIZ1        | -1.07 | 8.58E-11 | -1.17 | -0.98 | -0.20 | 0.1013 |
| ILMN_1670028 | LPIN2        | 1.48  | 1.05E-20 | 1.57  | 1.39  | 0.18  | 0.1017 |

|              |              |       |          |       |       |       |        |
|--------------|--------------|-------|----------|-------|-------|-------|--------|
| ILMN_1672504 | PDXK         | -1.07 | 3.85E-13 | -0.92 | -1.22 | 0.29  | 0.1018 |
| ILMN_1775501 | IL1B         | 4.79  | 1.95E-24 | 4.51  | 5.08  | -0.57 | 0.1019 |
| ILMN_2169439 | ITGAV        | -0.87 | 5.21E-10 | -0.78 | -0.95 | 0.18  | 0.1019 |
| ILMN_1761531 | SGPL1        | -0.64 | 1.18E-08 | -0.53 | -0.75 | 0.21  | 0.1020 |
| ILMN_1719286 | CTSA         | -0.77 | 1.06E-10 | -0.67 | -0.86 | 0.19  | 0.1021 |
| ILMN_1704094 | PSMA6        | 0.81  | 7.44E-09 | 0.69  | 0.93  | -0.24 | 0.1023 |
| ILMN_1679133 | SERPINB1     | 0.81  | 3.54E-10 | 0.71  | 0.91  | -0.20 | 0.1032 |
| ILMN_1705066 | BTBD11       | 0.61  | 1.14E-05 | 0.73  | 0.50  | 0.23  | 0.1033 |
| ILMN_1671265 | ING2         | -0.60 | 1.39E-14 | -0.53 | -0.66 | 0.13  | 0.1034 |
| ILMN_1756920 | ADAM15       | -1.13 | 2.58E-14 | -1.04 | -1.23 | 0.19  | 0.1037 |
| ILMN_2199439 | CA2          | -1.57 | 9.48E-10 | -1.84 | -1.31 | -0.53 | 0.1038 |
| ILMN_2396991 | HCST         | -0.78 | 8.31E-10 | -0.86 | -0.69 | -0.17 | 0.1040 |
| ILMN_1731043 | TRA2A        | 0.83  | 1.21E-09 | 0.92  | 0.73  | 0.19  | 0.1040 |
| ILMN_1667748 | ANKRD33      | -0.76 | 1.62E-03 | -0.95 | -0.57 | -0.38 | 0.1043 |
| ILMN_1767006 | PSMB8        | 0.93  | 4.35E-13 | 0.83  | 1.03  | -0.19 | 0.1045 |
| ILMN_2133675 | SGSH         | -0.76 | 2.30E-07 | -0.88 | -0.64 | -0.24 | 0.1046 |
| ILMN_1691572 | TST          | -1.48 | 3.68E-11 | -1.34 | -1.63 | 0.29  | 0.1048 |
| ILMN_3283680 | LOC345041    | 0.90  | 8.00E-16 | 0.99  | 0.80  | 0.19  | 0.1054 |
| ILMN_2342638 | ASGR2        | -0.74 | 3.94E-08 | -0.59 | -0.89 | 0.30  | 0.1066 |
| ILMN_1779234 | CXCL6        | 0.78  | 8.85E-06 | 0.58  | 0.99  | -0.41 | 0.1066 |
| ILMN_1735347 | MCEE         | -0.59 | 4.54E-12 | -0.51 | -0.67 | 0.16  | 0.1068 |
| ILMN_1752647 | KLRC1        | 0.95  | 1.14E-06 | 0.82  | 1.08  | -0.26 | 0.1070 |
| ILMN_3247723 | NOP16        | 0.60  | 2.04E-13 | 0.69  | 0.52  | 0.18  | 0.1072 |
| ILMN_1703108 | UBE2L6       | 1.65  | 6.30E-17 | 1.49  | 1.80  | -0.31 | 0.1073 |
| ILMN_2098743 | THEM2        | -0.75 | 1.56E-09 | -0.86 | -0.63 | -0.23 | 0.1074 |
| ILMN_1663347 | OTOF         | 1.74  | 1.39E-11 | 1.49  | 2.00  | -0.51 | 0.1075 |
| ILMN_2096405 | WDR37        | -0.71 | 1.45E-09 | -0.62 | -0.80 | 0.18  | 0.1075 |
| ILMN_1765557 | OLFML2B      | -1.06 | 1.39E-06 | -0.85 | -1.27 | 0.42  | 0.1077 |
| ILMN_2403237 | CHN2         | -0.72 | 9.98E-08 | -0.58 | -0.87 | 0.29  | 0.1079 |
| ILMN_1711608 | SSBP2        | -0.60 | 5.58E-10 | -0.50 | -0.70 | 0.19  | 0.1081 |
| ILMN_1782419 | GNG11        | 0.62  | 3.17E-05 | 0.46  | 0.77  | -0.30 | 0.1081 |
| ILMN_1689734 | IL1RN        | 2.05  | 1.32E-06 | 1.68  | 2.42  | -0.74 | 0.1082 |
| ILMN_2358626 | ADK          | -0.72 | 1.77E-08 | -0.56 | -0.87 | 0.31  | 0.1096 |
| ILMN_1811616 | EEPD1        | -0.72 | 4.86E-11 | -0.61 | -0.82 | 0.21  | 0.1108 |
| ILMN_1769245 | GLIPR1       | -1.98 | 6.45E-20 | -1.86 | -2.10 | 0.24  | 0.1121 |
| ILMN_1715760 | LGALS9       | 0.80  | 7.60E-10 | 0.70  | 0.90  | -0.21 | 0.1123 |
| ILMN_1812191 | C12orf57     | -1.38 | 3.35E-18 | -1.48 | -1.27 | -0.21 | 0.1124 |
| ILMN_2390162 | PHF11        | 1.71  | 3.39E-23 | 1.62  | 1.80  | -0.18 | 0.1125 |
| ILMN_1656938 | LOC731486    | -2.05 | 1.02E-16 | -2.17 | -1.92 | -0.25 | 0.1129 |
| ILMN_1660663 | DYRK1A       | 0.63  | 1.63E-15 | 0.69  | 0.56  | 0.13  | 0.1130 |
| ILMN_1771326 | C15orf44     | 0.64  | 1.05E-18 | 0.70  | 0.58  | 0.12  | 0.1132 |
| ILMN_2134538 | FTHL11       | -0.67 | 7.56E-03 | -0.79 | -0.55 | -0.24 | 0.1135 |
| ILMN_1705153 | NEFH         | 0.74  | 1.24E-07 | 0.60  | 0.89  | -0.29 | 0.1137 |
| ILMN_1811480 | ADPRHL2      | 0.68  | 1.07E-11 | 0.59  | 0.76  | -0.17 | 0.1138 |
| ILMN_1692938 | PSAT1        | 1.01  | 8.78E-10 | 1.13  | 0.89  | 0.24  | 0.1139 |
| ILMN_1735058 | CHST12       | 1.43  | 6.87E-16 | 1.35  | 1.52  | -0.17 | 0.1141 |
| ILMN_1753712 | STX10        | -1.04 | 1.35E-16 | -0.93 | -1.15 | 0.22  | 0.1141 |
| ILMN_1728799 | FBP1         | -2.60 | 2.15E-11 | -2.90 | -2.31 | -0.59 | 0.1141 |
| ILMN_2087702 | MYH9         | -0.68 | 3.22E-13 | -0.60 | -0.76 | 0.17  | 0.1143 |
| ILMN_1653166 | CLEC10A      | -0.97 | 1.59E-09 | -0.80 | -1.15 | 0.34  | 0.1144 |
| ILMN_1805863 | WDR81        | -0.87 | 1.64E-15 | -0.76 | -0.97 | 0.21  | 0.1152 |
| ILMN_1779010 | MAP3K3       | -0.65 | 7.69E-14 | -0.56 | -0.74 | 0.18  | 0.1153 |
| ILMN_1660199 | ACAA2        | -0.68 | 1.54E-11 | -0.77 | -0.60 | -0.17 | 0.1154 |
| ILMN_1774874 | IL1RN        | 1.81  | 1.04E-05 | 1.46  | 2.16  | -0.70 | 0.1157 |
| ILMN_1685009 | ITGAM        | -0.98 | 1.03E-04 | -1.17 | -0.78 | -0.39 | 0.1162 |
| ILMN_1660579 | CRLF3        | 0.71  | 3.54E-14 | 0.79  | 0.62  | 0.16  | 0.1164 |
| ILMN_1743806 | MIF4GD       | -0.85 | 2.97E-14 | -0.77 | -0.94 | 0.17  | 0.1166 |
| ILMN_3246805 | LOC100134364 | -0.95 | 6.37E-13 | -1.06 | -0.83 | -0.23 | 0.1175 |
| ILMN_1746525 | FTHL2        | -0.74 | 1.47E-03 | -0.85 | -0.63 | -0.22 | 0.1181 |
| ILMN_1673795 | HSD17B4      | -1.01 | 2.94E-13 | -0.89 | -1.13 | 0.24  | 0.1184 |
| ILMN_2352303 | RASSF2       | -1.26 | 1.61E-15 | -1.13 | -1.39 | 0.25  | 0.1185 |
| ILMN_1655987 | STAB1        | -1.51 | 9.49E-13 | -1.32 | -1.70 | 0.38  | 0.1192 |
| ILMN_1669456 | NME3         | -0.68 | 2.87E-07 | -0.58 | -0.79 | 0.21  | 0.1196 |
| ILMN_2188722 | GLS          | -0.70 | 1.32E-13 | -0.79 | -0.61 | -0.18 | 0.1196 |
| ILMN_1765146 | IFNAR2       | -0.77 | 7.31E-13 | -0.83 | -0.71 | -0.13 | 0.1198 |
| ILMN_1769895 | CCR2         | -2.32 | 1.89E-15 | -2.08 | -2.55 | 0.47  | 0.1201 |
| ILMN_1816603 |              | -0.80 | 8.02E-12 | -0.68 | -0.93 | 0.25  | 0.1203 |
| ILMN_1773154 | NFKBIA       | 0.75  | 3.81E-08 | 0.64  | 0.86  | -0.22 | 0.1204 |
| ILMN_1679232 | KIDINS220    | -0.59 | 1.06E-10 | -0.51 | -0.66 | 0.15  | 0.1205 |
| ILMN_3226505 | MSL3         | 1.04  | 7.19E-14 | 1.13  | 0.94  | 0.19  | 0.1207 |
| ILMN_3243061 | SIGLEC14     | 0.68  | 2.80E-02 | 0.53  | 0.84  | -0.30 | 0.1210 |
| ILMN_1732452 | MAPKAPK3     | -0.67 | 2.42E-06 | -0.74 | -0.59 | -0.14 | 0.1214 |
| ILMN_1761921 | IL12RB2      | 0.82  | 5.57E-11 | 0.71  | 0.94  | -0.22 | 0.1219 |
| ILMN_1806908 | PRKCB1       | -0.80 | 4.13E-15 | -0.72 | -0.87 | 0.15  | 0.1221 |

|              |           |       |          |       |       |       |        |
|--------------|-----------|-------|----------|-------|-------|-------|--------|
| ILMN_2162972 | LYZ       | -3.27 | 1.41E-15 | -2.97 | -3.58 | 0.61  | 0.1224 |
| ILMN_1730454 | FOLR3     | -1.01 | 3.11E-02 | -0.77 | -1.25 | 0.48  | 0.1229 |
| ILMN_1730710 | ADORA3    | -0.77 | 4.67E-08 | -0.62 | -0.91 | 0.29  | 0.1231 |
| ILMN_1762003 | SEC62     | -0.69 | 6.60E-10 | -0.61 | -0.76 | 0.15  | 0.1238 |
| ILMN_1723480 | BST2      | 1.39  | 1.94E-20 | 1.31  | 1.47  | -0.17 | 0.1241 |
| ILMN_1736256 | CALR      | -0.61 | 1.32E-10 | -0.71 | -0.52 | -0.18 | 0.1242 |
| ILMN_1778104 | ACADM     | 0.66  | 2.03E-08 | 0.75  | 0.58  | 0.17  | 0.1244 |
| ILMN_1700428 | HLA-DOB   | 0.73  | 5.29E-07 | 0.66  | 0.81  | -0.15 | 0.1250 |
| ILMN_2150196 | LRRC25    | -1.02 | 1.44E-05 | -1.17 | -0.88 | -0.29 | 0.1253 |
| ILMN_1736939 | UGCG      | 0.61  | 7.06E-08 | 0.51  | 0.70  | -0.19 | 0.1254 |
| ILMN_1749078 | TIMP2     | -1.17 | 2.86E-13 | -1.29 | -1.06 | -0.24 | 0.1255 |
| ILMN_1672606 | OAS1      | 0.63  | 1.25E-11 | 0.54  | 0.73  | -0.18 | 0.1255 |
| ILMN_1692731 | TTYH3     | -1.00 | 1.77E-10 | -1.13 | -0.87 | -0.26 | 0.1258 |
| ILMN_2083469 | IRS2      | -0.61 | 2.30E-06 | -0.50 | -0.71 | 0.21  | 0.1262 |
| ILMN_1733675 | MPP1      | -1.52 | 3.32E-10 | -1.66 | -1.38 | -0.28 | 0.1268 |
| ILMN_1746148 | LRRC33    | -0.59 | 6.65E-04 | -0.70 | -0.47 | -0.23 | 0.1270 |
| ILMN_2267914 | CD68      | -1.09 | 2.01E-07 | -1.26 | -0.92 | -0.33 | 0.1270 |
| ILMN_1709333 | OAS2      | 2.23  | 4.33E-27 | 2.11  | 2.35  | -0.23 | 0.1270 |
| ILMN_1768595 | DLG4      | -0.61 | 8.53E-12 | -0.51 | -0.70 | 0.18  | 0.1281 |
| ILMN_1696654 | IFIT5     | 1.89  | 1.55E-26 | 1.79  | 1.99  | -0.20 | 0.1291 |
| ILMN_1671489 | PC        | -0.62 | 2.06E-11 | -0.53 | -0.71 | 0.17  | 0.1292 |
| ILMN_1685403 | MMP7      | 0.95  | 2.58E-04 | 0.72  | 1.18  | -0.45 | 0.1300 |
| ILMN_1712707 | ABHD8     | -0.97 | 4.63E-16 | -0.88 | -1.07 | 0.19  | 0.1304 |
| ILMN_1680770 | UBQLN2    | 0.68  | 3.39E-09 | 0.76  | 0.60  | 0.17  | 0.1310 |
| ILMN_1677440 | ATP6AP2   | -1.15 | 2.28E-18 | -1.05 | -1.24 | 0.19  | 0.1315 |
| ILMN_1779706 | TP53BP2   | 0.68  | 2.61E-09 | 0.58  | 0.78  | -0.19 | 0.1316 |
| ILMN_1651776 | FHOD1     | -0.71 | 3.08E-16 | -0.64 | -0.79 | 0.15  | 0.1320 |
| ILMN_2279635 | EIF4G2    | 0.73  | 7.78E-11 | 0.83  | 0.63  | 0.20  | 0.1320 |
| ILMN_1651316 | CD69      | 1.57  | 1.63E-17 | 1.48  | 1.66  | -0.18 | 0.1324 |
| ILMN_1764803 | SMU1      | 0.70  | 1.50E-16 | 0.75  | 0.64  | 0.12  | 0.1326 |
| ILMN_2349061 | IRF7      | 2.84  | 2.64E-23 | 2.69  | 2.99  | -0.30 | 0.1336 |
| ILMN_1782551 | E2F5      | 0.82  | 6.57E-11 | 0.75  | 0.88  | -0.14 | 0.1337 |
| ILMN_1733927 | TCEB2     | -0.61 | 7.99E-12 | -0.53 | -0.69 | 0.16  | 0.1340 |
| ILMN_3280847 | LOC651697 | 0.63  | 9.88E-05 | 0.69  | 0.56  | 0.13  | 0.1345 |
| ILMN_1705047 | TLR8      | -0.90 | 1.26E-04 | -1.08 | -0.71 | -0.38 | 0.1354 |
| ILMN_1776602 | RNASE4    | -1.03 | 2.04E-06 | -0.81 | -1.26 | 0.45  | 0.1354 |
| ILMN_1671478 | CKB       | 0.90  | 8.00E-11 | 0.77  | 1.02  | -0.25 | 0.1360 |
| ILMN_1736042 | ME1       | -0.96 | 7.06E-15 | -1.07 | -0.86 | -0.21 | 0.1364 |
| ILMN_1690125 | PDLIM7    | -0.69 | 1.10E-04 | -0.83 | -0.55 | -0.28 | 0.1368 |
| ILMN_1794132 | NDUFS8    | -0.74 | 4.08E-11 | -0.63 | -0.85 | 0.22  | 0.1375 |
| ILMN_1793831 | TRADD     | 0.92  | 1.81E-11 | 1.02  | 0.83  | 0.19  | 0.1378 |
| ILMN_2400759 | CPVL      | -3.29 | 6.85E-16 | -2.99 | -3.58 | 0.58  | 0.1381 |
| ILMN_1716815 | CEACAM1   | 1.07  | 5.20E-05 | 0.97  | 1.17  | -0.20 | 0.1384 |
| ILMN_2415144 | SP110     | 1.96  | 5.72E-22 | 1.85  | 2.07  | -0.22 | 0.1389 |
| ILMN_1796316 | MMP9      | -1.29 | 9.35E-04 | -1.66 | -0.91 | -0.75 | 0.1393 |
| ILMN_1731418 | SP110     | 1.97  | 1.95E-24 | 1.87  | 2.07  | -0.20 | 0.1394 |
| ILMN_1776998 | DNAJA4    | 0.71  | 3.53E-11 | 0.63  | 0.78  | -0.15 | 0.1412 |
| ILMN_2093343 | PLAC8     | 1.44  | 1.42E-14 | 1.34  | 1.54  | -0.20 | 0.1426 |
| ILMN_2070044 | PPM1K     | 2.36  | 3.25E-30 | 2.44  | 2.28  | 0.16  | 0.1431 |
| ILMN_1746175 | TNFSF4    | 1.00  | 9.09E-13 | 0.88  | 1.13  | -0.25 | 0.1433 |
| ILMN_1678678 | SLC37A4   | -0.61 | 1.49E-08 | -0.53 | -0.69 | 0.15  | 0.1442 |
| ILMN_1803194 | GALK1     | -0.78 | 3.86E-11 | -0.67 | -0.89 | 0.22  | 0.1443 |
| ILMN_1789535 | DHDDS     | -0.86 | 6.59E-13 | -0.76 | -0.95 | 0.19  | 0.1451 |
| ILMN_1708006 | MICB      | 1.23  | 1.89E-15 | 1.14  | 1.32  | -0.18 | 0.1451 |
| ILMN_1729314 | PRG2      | 0.60  | 5.08E-07 | 0.48  | 0.73  | -0.25 | 0.1452 |
| ILMN_1654319 | HAPLN3    | 1.71  | 6.89E-14 | 1.58  | 1.84  | -0.27 | 0.1455 |
| ILMN_1724066 | PLCB2     | -1.23 | 2.01E-10 | -1.07 | -1.39 | 0.32  | 0.1457 |
| ILMN_1761912 | MGAT1     | -0.81 | 4.75E-10 | -0.89 | -0.73 | -0.16 | 0.1461 |
| ILMN_1696420 | BRD7      | 0.61  | 3.61E-17 | 0.66  | 0.55  | 0.11  | 0.1465 |
| ILMN_1799062 | NFKB2     | 0.62  | 5.34E-08 | 0.52  | 0.72  | -0.20 | 0.1466 |
| ILMN_1666733 | IL8       | 3.02  | 4.14E-14 | 2.70  | 3.33  | -0.64 | 0.1467 |
| ILMN_1787509 | PRIC285   | 3.06  | 1.25E-21 | 2.86  | 3.26  | -0.39 | 0.1469 |
| ILMN_1652512 | C2CD2     | -0.59 | 3.19E-13 | -0.51 | -0.66 | 0.16  | 0.1472 |
| ILMN_1791147 | YPEL3     | -0.94 | 1.82E-08 | -0.80 | -1.08 | 0.28  | 0.1475 |
| ILMN_2381758 | G3BP2     | 0.62  | 1.01E-12 | 0.70  | 0.53  | 0.17  | 0.1477 |
| ILMN_2376416 | UBXN11    | -1.18 | 1.72E-16 | -1.07 | -1.30 | 0.22  | 0.1481 |
| ILMN_3253304 | BRI3P1    | -0.71 | 8.70E-04 | -0.82 | -0.60 | -0.22 | 0.1494 |
| ILMN_1724533 | LY96      | -0.60 | 6.12E-07 | -0.47 | -0.73 | 0.26  | 0.1496 |
| ILMN_1745471 | IRF9      | 1.07  | 3.10E-12 | 0.95  | 1.18  | -0.23 | 0.1510 |
| ILMN_3244117 | STMN3     | -0.66 | 5.01E-05 | -0.55 | -0.77 | 0.23  | 0.1511 |
| ILMN_1653766 | CCL24     | -2.71 | 6.89E-08 | -3.06 | -2.36 | -0.70 | 0.1515 |
| ILMN_2078264 | C3orf38   | 0.68  | 8.50E-11 | 0.60  | 0.76  | -0.17 | 0.1521 |
| ILMN_1735461 | DDX21     | 0.76  | 4.43E-11 | 0.87  | 0.65  | 0.22  | 0.1528 |
| ILMN_1687306 | LGALS2    | -1.55 | 3.00E-06 | -1.27 | -1.83 | 0.57  | 0.1534 |

|              |           |       |          |       |       |       |        |
|--------------|-----------|-------|----------|-------|-------|-------|--------|
| ILMN_2387285 | MSL3      | 1.06  | 6.82E-18 | 1.14  | 0.98  | 0.16  | 0.1534 |
| ILMN_1685625 | UCP2      | -0.83 | 1.14E-05 | -0.97 | -0.69 | -0.28 | 0.1539 |
| ILMN_1795158 | FGR       | -0.71 | 9.16E-03 | -0.92 | -0.49 | -0.43 | 0.1540 |
| ILMN_1811592 | ARHGAP21  | -0.71 | 6.45E-11 | -0.79 | -0.62 | -0.17 | 0.1541 |
| ILMN_1751569 | C1orf173  | 1.29  | 1.07E-12 | 1.45  | 1.13  | 0.32  | 0.1545 |
| ILMN_1677814 | ABCC3     | -3.18 | 1.76E-26 | -3.08 | -3.29 | 0.21  | 0.1549 |
| ILMN_2331266 | NUMB      | -0.62 | 1.32E-07 | -0.70 | -0.54 | -0.17 | 0.1565 |
| ILMN_2347949 | G6PD      | -1.18 | 2.77E-10 | -1.30 | -1.05 | -0.25 | 0.1566 |
| ILMN_1667260 | MAPK3     | -0.74 | 6.35E-09 | -0.65 | -0.82 | 0.16  | 0.1571 |
| ILMN_2368576 | UBA52     | -0.68 | 1.32E-08 | -0.59 | -0.77 | 0.18  | 0.1577 |
| ILMN_1748591 | ODC1      | 0.93  | 1.24E-14 | 1.02  | 0.83  | 0.19  | 0.1584 |
| ILMN_1764043 | TTL       | -0.59 | 2.46E-10 | -0.53 | -0.65 | 0.12  | 0.1588 |
| ILMN_2375319 | RASGRP2   | -1.06 | 3.77E-07 | -0.95 | -1.17 | 0.22  | 0.1591 |
| ILMN_1671054 | HLA-A     | 0.70  | 1.33E-04 | 0.57  | 0.84  | -0.27 | 0.1591 |
| ILMN_1729234 | TPP1      | -1.34 | 1.49E-13 | -1.24 | -1.43 | 0.19  | 0.1604 |
| ILMN_1791912 | SIDT2     | -0.61 | 2.68E-04 | -0.72 | -0.49 | -0.23 | 0.1615 |
| ILMN_1773073 | PHYH      | -0.73 | 6.71E-12 | -0.65 | -0.81 | 0.15  | 0.1615 |
| ILMN_1760727 | ANG       | -1.48 | 2.44E-07 | -1.23 | -1.74 | 0.51  | 0.1618 |
| ILMN_1759818 | SORL1     | -1.43 | 2.31E-13 | -1.31 | -1.54 | 0.23  | 0.1623 |
| ILMN_1660021 | M6PRBP1   | -0.68 | 8.58E-09 | -0.75 | -0.61 | -0.14 | 0.1624 |
| ILMN_1771688 | RAB7B     | -1.47 | 1.62E-11 | -1.59 | -1.35 | -0.24 | 0.1626 |
| ILMN_1718558 | PARP12    | 2.26  | 2.71E-22 | 2.14  | 2.38  | -0.25 | 0.1626 |
| ILMN_1713156 | MSL3L1    | 1.08  | 1.45E-15 | 1.17  | 0.98  | 0.18  | 0.1628 |
| ILMN_1721391 | ATP6V0B   | -0.98 | 2.61E-11 | -1.08 | -0.89 | -0.19 | 0.1636 |
| ILMN_1661599 | DDIT4     | 0.68  | 6.00E-10 | 0.60  | 0.77  | -0.17 | 0.1637 |
| ILMN_1730612 | DBNDD2    | -1.51 | 2.39E-14 | -1.40 | -1.62 | 0.22  | 0.1637 |
| ILMN_1774077 | GBP2      | 0.81  | 1.58E-07 | 0.69  | 0.93  | -0.24 | 0.1649 |
| ILMN_1767894 | POLB      | -0.70 | 3.61E-10 | -0.79 | -0.60 | -0.19 | 0.1656 |
| ILMN_2387553 | PSMA3     | 0.65  | 5.44E-10 | 0.55  | 0.75  | -0.20 | 0.1662 |
| ILMN_2155719 | NBPF10    | -0.85 | 4.43E-09 | -0.76 | -0.93 | 0.18  | 0.1700 |
| ILMN_1774761 | CCR2      | -2.65 | 9.12E-16 | -2.42 | -2.88 | 0.16  | 0.1707 |
| ILMN_1785095 | ATP6V0E2  | -0.76 | 6.57E-06 | -0.66 | -0.85 | 0.19  | 0.1719 |
| ILMN_2096719 | GRK5      | 1.08  | 2.18E-15 | 1.15  | 1.01  | 0.14  | 0.1722 |
| ILMN_1814305 | SAMD9     | 2.59  | 7.86E-27 | 2.50  | 2.68  | -0.18 | 0.1726 |
| ILMN_1670807 | FAM84B    | 0.75  | 8.31E-08 | 0.82  | 0.68  | 0.14  | 0.1727 |
| ILMN_1691364 | STAT1     | 1.13  | 3.91E-07 | 0.91  | 1.35  | -0.44 | 0.1729 |
| ILMN_2349393 | MDK       | 1.08  | 4.83E-21 | 1.00  | 1.15  | -0.15 | 0.1731 |
| ILMN_2184373 | IL8       | 2.10  | 7.03E-13 | 1.85  | 2.35  | -0.50 | 0.1735 |
| ILMN_2310896 | NLRP3     | -1.17 | 1.90E-08 | -1.30 | -1.03 | -0.27 | 0.1741 |
| ILMN_2410783 | GAA       | -1.29 | 1.11E-16 | -1.20 | -1.38 | 0.19  | 0.1741 |
| ILMN_1798181 | IRF7      | 2.80  | 9.99E-23 | 2.65  | 2.96  | -0.31 | 0.1755 |
| ILMN_1742230 | BAZ1A     | 0.88  | 2.62E-14 | 0.81  | 0.96  | -0.15 | 0.1755 |
| ILMN_1758250 | TRAFD1    | 1.48  | 4.02E-16 | 1.37  | 1.60  | -0.23 | 0.1758 |
| ILMN_3239574 | SNORD3A   | 0.70  | 3.41E-07 | 0.59  | 0.81  | -0.22 | 0.1764 |
| ILMN_1707077 | SORT1     | -1.41 | 1.38E-18 | -1.35 | -1.47 | 0.12  | 0.1765 |
| ILMN_2211065 | TMEM91    | -0.97 | 8.75E-14 | -0.88 | -1.07 | 0.20  | 0.1776 |
| ILMN_1779015 | ZNF467    | -1.61 | 5.61E-10 | -1.46 | -1.76 | 0.30  | 0.1778 |
| ILMN_2094166 | CHMP5     | 1.18  | 4.25E-16 | 1.09  | 1.27  | -0.18 | 0.1779 |
| ILMN_2331087 | MS4A7     | -1.08 | 4.80E-03 | -1.29 | -0.87 | -0.42 | 0.1781 |
| ILMN_1677038 | FLJ21986  | -0.80 | 1.07E-12 | -0.71 | -0.90 | 0.19  | 0.1791 |
| ILMN_1669273 | PPT1      | -1.40 | 6.62E-19 | -1.30 | -1.51 | 0.20  | 0.1797 |
| ILMN_3308961 | MIR1974   | 0.97  | 3.46E-03 | 0.69  | 1.25  | -0.56 | 0.1799 |
| ILMN_1692191 | GNA12     | -0.80 | 1.00E-12 | -0.72 | -0.88 | 0.16  | 0.1800 |
| ILMN_1656670 | HLA-G     | 0.76  | 4.83E-06 | 0.68  | 0.84  | -0.15 | 0.1804 |
| ILMN_1688423 | FCER1A    | -0.85 | 3.19E-05 | -0.72 | -0.98 | 0.26  | 0.1810 |
| ILMN_1667374 | C14orf149 | 0.59  | 6.94E-13 | 0.66  | 0.52  | 0.14  | 0.1810 |
| ILMN_2411076 | MATR3     | 1.01  | 5.43E-19 | 1.09  | 0.93  | 0.15  | 0.1811 |
| ILMN_1728298 | SBK1      | 0.89  | 6.05E-11 | 0.80  | 0.98  | -0.17 | 0.1812 |
| ILMN_1664931 | GTF2E2    | 0.69  | 3.58E-14 | 0.63  | 0.76  | -0.12 | 0.1814 |
| ILMN_1795464 | LTA       | 1.91  | 8.47E-22 | 1.81  | 2.02  | -0.21 | 0.1816 |
| ILMN_1783996 | DEM1      | -1.43 | 2.70E-14 | -1.30 | -1.56 | 0.26  | 0.1816 |
| ILMN_2363065 | RTN3      | -1.24 | 3.50E-14 | -1.15 | -1.33 | 0.18  | 0.1819 |
| ILMN_1773780 | FAM173A   | -0.68 | 7.55E-09 | -0.57 | -0.79 | 0.22  | 0.1829 |
| ILMN_1780825 | RRAS      | -1.20 | 1.54E-10 | -1.08 | -1.32 | 0.25  | 0.1838 |
| ILMN_3247998 | STAP1     | 1.39  | 6.42E-15 | 1.33  | 1.46  | -0.13 | 0.1839 |
| ILMN_1797988 | KLRD1     | 1.46  | 2.24E-09 | 1.36  | 1.56  | -0.20 | 0.1840 |
| ILMN_1678422 | DHX58     | 2.34  | 1.03E-25 | 2.23  | 2.44  | -0.21 | 0.1841 |
| ILMN_1712026 | NLRP3     | -1.21 | 3.95E-08 | -1.35 | -1.08 | -0.27 | 0.1847 |
| ILMN_1682098 | PSMA4     | 0.84  | 1.10E-11 | 0.76  | 0.93  | -0.17 | 0.1847 |
| ILMN_1802027 | MGST2     | -1.38 | 8.93E-16 | -1.28 | -1.49 | 0.20  | 0.1849 |
| ILMN_1801307 | TNFSF10   | 2.69  | 1.18E-20 | 2.53  | 2.86  | -0.33 | 0.1850 |
| ILMN_2198185 | CXorf12   | 0.97  | 8.38E-19 | 1.03  | 0.90  | 0.14  | 0.1856 |
| ILMN_1666178 | TP53I13   | -0.60 | 4.97E-07 | -0.53 | -0.67 | 0.14  | 0.1858 |
| ILMN_1787275 | STAG3     | 0.80  | 1.09E-12 | 0.73  | 0.87  | -0.14 | 0.1859 |

|              |           |       |          |       |       |       |        |
|--------------|-----------|-------|----------|-------|-------|-------|--------|
| ILMN_1799467 | SAMD9L    | 2.78  | 1.33E-20 | 2.62  | 2.93  | -0.31 | 0.1867 |
| ILMN_3304898 | LOC92755  | 0.74  | 5.56E-10 | 0.67  | 0.81  | -0.14 | 0.1871 |
| ILMN_2355665 | MTP18     | 0.88  | 4.71E-15 | 0.96  | 0.80  | 0.16  | 0.1875 |
| ILMN_2115696 | USP42     | 0.86  | 1.48E-15 | 0.92  | 0.81  | 0.11  | 0.1875 |
| ILMN_1744023 | MGC18216  | -0.62 | 1.57E-07 | -0.56 | -0.67 | 0.11  | 0.1876 |
| ILMN_1749521 | SLC35E3   | -0.87 | 1.68E-15 | -0.80 | -0.93 | 0.13  | 0.1876 |
| ILMN_2338452 | SERPINA1  | -1.05 | 3.54E-04 | -1.25 | -0.85 | -0.40 | 0.1879 |
| ILMN_2351611 | UBQLN1    | 0.76  | 5.54E-14 | 0.70  | 0.83  | -0.12 | 0.1881 |
| ILMN_1674063 | OAS2      | 2.47  | 1.66E-22 | 2.33  | 2.62  | -0.28 | 0.1895 |
| ILMN_1676448 | WDFY1     | 0.96  | 3.84E-12 | 0.85  | 1.07  | -0.22 | 0.1896 |
| ILMN_2396571 | GPR108    | -0.69 | 5.71E-13 | -0.62 | -0.76 | 0.13  | 0.1902 |
| ILMN_3282436 | LOC651198 | -0.62 | 1.37E-09 | -0.56 | -0.69 | 0.13  | 0.1903 |
| ILMN_1799134 | KLRD1     | 1.46  | 3.83E-10 | 1.37  | 1.54  | -0.17 | 0.1906 |
| ILMN_2363586 | SDCBP     | -1.10 | 6.69E-10 | -1.22 | -0.98 | -0.24 | 0.1925 |
| ILMN_2352563 | CLDND1    | 0.91  | 4.41E-14 | 0.96  | 0.87  | 0.10  | 0.1934 |
| ILMN_1703538 | AIF1      | -2.88 | 1.00E-14 | -3.05 | -2.71 | -0.35 | 0.1941 |
| ILMN_1797191 | KIAA0040  | 0.69  | 1.34E-11 | 0.63  | 0.75  | -0.13 | 0.1949 |
| ILMN_1770824 | ARHGAP4   | -0.80 | 2.28E-09 | -0.71 | -0.90 | 0.19  | 0.1958 |
| ILMN_1717326 | SLC29A3   | -0.72 | 4.12E-10 | -0.62 | -0.82 | 0.20  | 0.1958 |
| ILMN_1813572 | IL16      | -0.86 | 5.06E-10 | -0.77 | -0.94 | 0.17  | 0.1960 |
| ILMN_2383975 | PRDX5     | -0.70 | 7.47E-13 | -0.62 | -0.78 | 0.16  | 0.1973 |
| ILMN_2212590 | TMEM170A  | 0.67  | 4.95E-13 | 0.60  | 0.74  | -0.13 | 0.1973 |
| ILMN_1749109 | PSAP      | -1.11 | 3.16E-10 | -1.21 | -1.00 | -0.21 | 0.1973 |
| ILMN_1768505 | IL13RA1   | -2.79 | 6.40E-19 | -2.93 | -2.64 | -0.29 | 0.1981 |
| ILMN_1789751 | MFSD1     | -1.39 | 7.61E-14 | -1.51 | -1.28 | -0.22 | 0.1981 |
| ILMN_2085722 | ING2      | -0.85 | 4.67E-12 | -0.76 | -0.94 | 0.18  | 0.1983 |
| ILMN_1800993 | CLUAP1    | 0.74  | 4.57E-11 | 0.80  | 0.68  | 0.12  | 0.1985 |
| ILMN_1710482 | APLP2     | -0.65 | 7.35E-08 | -0.57 | -0.74 | 0.16  | 0.1990 |
| ILMN_2401641 | ALDH3A2   | -0.63 | 1.36E-13 | -0.57 | -0.68 | 0.11  | 0.1992 |
| ILMN_1693552 | CD300A    | -0.65 | 1.35E-09 | -0.74 | -0.56 | -0.19 | 0.1994 |
| ILMN_2348268 | IFFO1     | -0.68 | 1.90E-08 | -0.60 | -0.76 | 0.16  | 0.1994 |
| ILMN_1767475 | CERK      | -1.06 | 1.37E-13 | -0.98 | -1.13 | 0.15  | 0.2005 |
| ILMN_1667711 | HRASLS3   | 0.70  | 3.77E-08 | 0.63  | 0.78  | -0.16 | 0.2008 |
| ILMN_2384181 | DHRS9     | -1.24 | 2.05E-11 | -1.37 | -1.11 | -0.27 | 0.2010 |
| ILMN_1785252 | SLC26A6   | -0.63 | 5.60E-06 | -0.55 | -0.71 | 0.17  | 0.2013 |
| ILMN_1690365 | USP41     | 1.91  | 7.47E-25 | 1.81  | 2.00  | -0.19 | 0.2015 |
| ILMN_1765547 | IRF2      | 0.66  | 5.89E-12 | 0.59  | 0.73  | -0.15 | 0.2017 |
| ILMN_2379644 | CD74      | -0.74 | 1.50E-07 | -0.83 | -0.65 | -0.18 | 0.2021 |
| ILMN_1691693 | FCRL3     | 0.65  | 1.91E-04 | 0.57  | 0.72  | -0.15 | 0.2024 |
| ILMN_1664912 | IL11RA    | -0.74 | 7.42E-05 | -0.66 | -0.83 | 0.16  | 0.2026 |
| ILMN_1801077 | PLIN2     | -0.93 | 2.88E-06 | -0.82 | -1.03 | 0.21  | 0.2027 |
| ILMN_1810559 | RHOQ      | -1.10 | 3.69E-07 | -1.23 | -0.97 | -0.26 | 0.2031 |
| ILMN_1678671 | KLHL24    | -0.70 | 4.39E-10 | -0.64 | -0.75 | 0.11  | 0.2036 |
| ILMN_2079655 | KLRB1     | -0.75 | 6.18E-05 | -0.85 | -0.65 | -0.19 | 0.2038 |
| ILMN_1875342 |           | 0.77  | 2.73E-11 | 0.86  | 0.69  | 0.17  | 0.2045 |
| ILMN_1777325 | STAT1     | 1.01  | 4.47E-08 | 0.84  | 1.17  | -0.33 | 0.2053 |
| ILMN_2086965 | CCL1      | 1.35  | 1.11E-07 | 1.11  | 1.59  | -0.47 | 0.2064 |
| ILMN_1761463 | EFHD2     | -0.83 | 7.79E-12 | -0.77 | -0.89 | 0.13  | 0.2069 |
| ILMN_1693394 | BCKDK     | -0.78 | 7.43E-08 | -0.85 | -0.71 | -0.14 | 0.2086 |
| ILMN_2200917 | SLC4A7    | -0.94 | 9.94E-16 | -0.88 | -1.00 | 0.11  | 0.2088 |
| ILMN_2192072 | MMP7      | 1.22  | 6.04E-05 | 1.01  | 1.43  | -0.43 | 0.2088 |
| ILMN_1743130 | PTGFRN    | -0.80 | 9.25E-10 | -0.69 | -0.90 | 0.22  | 0.2089 |
| ILMN_1806408 | ACADVL    | -0.75 | 5.70E-09 | -0.65 | -0.85 | 0.20  | 0.2101 |
| ILMN_2053527 | PARP9     | 1.86  | 4.54E-17 | 1.75  | 1.96  | -0.22 | 0.2108 |
| ILMN_1737857 | GTF2B     | 0.75  | 3.99E-15 | 0.68  | 0.83  | -0.15 | 0.2111 |
| ILMN_1810055 | ITFG3     | -0.61 | 6.26E-08 | -0.53 | -0.69 | 0.16  | 0.2112 |
| ILMN_1700811 | UBFD1     | 0.62  | 5.00E-13 | 0.56  | 0.67  | -0.11 | 0.2113 |
| ILMN_1779547 | HPSE      | 0.72  | 2.56E-05 | 0.59  | 0.86  | -0.26 | 0.2118 |
| ILMN_1728163 | CTDSP1    | -0.76 | 1.76E-06 | -0.65 | -0.86 | 0.21  | 0.2119 |
| ILMN_1783621 | CMPK2     | 2.93  | 5.94E-34 | 2.84  | 3.02  | -0.17 | 0.2137 |
| ILMN_1709348 | ALDH1A1   | -1.08 | 2.46E-10 | -0.95 | -1.22 | 0.27  | 0.2139 |
| ILMN_2355168 | MGST1     | -0.61 | 4.63E-03 | -0.74 | -0.48 | -0.25 | 0.2145 |
| ILMN_2164242 | UBE2F     | 0.66  | 1.19E-10 | 0.60  | 0.73  | -0.12 | 0.2163 |
| ILMN_1776125 | TRK1      | 1.19  | 1.24E-09 | 1.09  | 1.29  | -0.20 | 0.2173 |
| ILMN_2129505 | CYBASC3   | -0.60 | 1.53E-05 | -0.48 | -0.71 | 0.23  | 0.2175 |
| ILMN_1693207 | KIR2DL4   | 0.59  | 4.30E-04 | 0.51  | 0.67  | -0.16 | 0.2182 |
| ILMN_1666049 | NUP214    | -1.35 | 9.46E-11 | -1.22 | -1.49 | 0.27  | 0.2186 |
| ILMN_1680246 | MAT2B     | 1.20  | 1.00E-15 | 1.29  | 1.11  | 0.18  | 0.2195 |
| ILMN_1784380 | DTX3L     | 1.53  | 3.02E-14 | 1.41  | 1.66  | -0.25 | 0.2197 |
| ILMN_1803811 | TRIB1     | 0.88  | 1.29E-07 | 0.78  | 0.98  | -0.20 | 0.2205 |
| ILMN_1705241 | TDRD7     | 1.81  | 5.59E-27 | 1.74  | 1.88  | -0.15 | 0.2215 |
| ILMN_1655612 | ARRDC2    | -0.79 | 4.38E-06 | -0.67 | -0.91 | 0.24  | 0.2221 |
| ILMN_2364272 | MBNL2     | -0.82 | 1.77E-11 | -0.73 | -0.90 | 0.17  | 0.2226 |
| ILMN_1815023 | PIM1      | 1.25  | 2.23E-13 | 1.13  | 1.36  | -0.24 | 0.2230 |

|              |           |       |          |       |       |       |        |
|--------------|-----------|-------|----------|-------|-------|-------|--------|
| ILMN_1738347 | RNPEP     | -0.76 | 1.98E-06 | -0.68 | -0.83 | 0.15  | 0.2233 |
| ILMN_1669122 | MGC39372  | 0.78  | 4.48E-15 | 0.70  | 0.85  | -0.15 | 0.2234 |
| ILMN_1796682 | PARP3     | 0.82  | 7.69E-14 | 0.88  | 0.75  | 0.14  | 0.2237 |
| ILMN_1654875 | CLC       | -1.10 | 1.94E-05 | -0.95 | -1.25 | 0.30  | 0.2241 |
| ILMN_2170813 | LAMP3     | 2.25  | 5.59E-27 | 2.33  | 2.18  | 0.14  | 0.2244 |
| ILMN_1742618 | XAF1      | 2.84  | 4.89E-19 | 2.67  | 3.02  | -0.36 | 0.2245 |
| ILMN_1795183 | RNASE1    | -1.99 | 6.31E-07 | -1.64 | -2.33 | 0.69  | 0.2249 |
| ILMN_1775762 | GNAI2     | -0.65 | 5.76E-09 | -0.56 | -0.75 | 0.19  | 0.2250 |
| ILMN_2366391 | PRDX1     | -0.77 | 1.52E-08 | -0.85 | -0.69 | -0.16 | 0.2255 |
| ILMN_1794875 | AGPAT9    | -0.88 | 9.65E-05 | -1.07 | -0.69 | -0.38 | 0.2258 |
| ILMN_3243714 | LOC642073 | -1.45 | 9.04E-05 | -1.59 | -1.32 | -0.27 | 0.2275 |
| ILMN_1812474 | TFG       | 0.67  | 2.21E-15 | 0.61  | 0.72  | -0.12 | 0.2276 |
| ILMN_1781824 | FASLG     | 2.10  | 3.71E-15 | 1.98  | 2.22  | -0.24 | 0.2278 |
| ILMN_1807044 | UBAC1     | -0.93 | 1.48E-15 | -0.86 | -1.00 | 0.14  | 0.2287 |
| ILMN_1669772 | LRP1      | -0.64 | 1.81E-13 | -0.58 | -0.71 | 0.13  | 0.2299 |
| ILMN_2112402 | PHF5A     | 1.31  | 1.55E-26 | 1.36  | 1.26  | 0.10  | 0.2310 |
| ILMN_2379788 | HIF1A     | 0.69  | 9.37E-06 | 0.62  | 0.77  | -0.15 | 0.2317 |
| ILMN_2089875 | TNFSF4    | 1.40  | 7.61E-14 | 1.28  | 1.52  | -0.24 | 0.2321 |
| ILMN_1678054 | TRIM21    | 1.59  | 2.71E-19 | 1.51  | 1.67  | -0.16 | 0.2325 |
| ILMN_1690105 | STAT1     | 1.37  | 4.87E-06 | 1.11  | 1.62  | -0.51 | 0.2328 |
| ILMN_2397721 | GLB1      | -1.18 | 9.87E-18 | -1.10 | -1.26 | 0.16  | 0.2340 |
| ILMN_1715332 | TTC21A    | 0.79  | 6.05E-20 | 0.84  | 0.74  | 0.10  | 0.2347 |
| ILMN_1702487 | SGK       | -1.29 | 9.94E-09 | -1.42 | -1.16 | -0.25 | 0.2361 |
| ILMN_2324672 | USF2      | -0.63 | 1.84E-10 | -0.55 | -0.71 | 0.16  | 0.2362 |
| ILMN_2383305 | GPATCH4   | 0.70  | 2.83E-11 | 0.77  | 0.64  | 0.13  | 0.2365 |
| ILMN_1756937 | ST8SIA4   | -0.59 | 2.19E-09 | -0.66 | -0.52 | -0.14 | 0.2368 |
| ILMN_1710752 | NAPRT1    | -0.89 | 1.92E-07 | -0.80 | -0.98 | 0.17  | 0.2398 |
| ILMN_1751559 | C16orf30  | -0.90 | 1.31E-05 | -0.83 | -0.98 | 0.15  | 0.2404 |
| ILMN_1710124 | CMTM8     | 0.80  | 3.91E-04 | 0.91  | 0.70  | 0.21  | 0.2412 |
| ILMN_1747305 | GIMAP8    | 0.59  | 4.61E-08 | 0.63  | 0.54  | 0.09  | 0.2422 |
| ILMN_1707695 | IFIT1     | 4.99  | 6.62E-25 | 4.78  | 5.20  | -0.42 | 0.2426 |
| ILMN_1731224 | PARP9     | 2.31  | 8.23E-18 | 2.15  | 2.46  | -0.31 | 0.2434 |
| ILMN_1669831 | C6orf192  | 1.41  | 8.92E-14 | 1.49  | 1.34  | 0.15  | 0.2436 |
| ILMN_1653708 | CORO1B    | -1.88 | 7.71E-15 | -2.00 | -1.76 | -0.24 | 0.2439 |
| ILMN_1674009 | TKTL1     | -0.72 | 7.54E-10 | -0.81 | -0.64 | -0.17 | 0.2441 |
| ILMN_1702691 | TNFAIP3   | 0.63  | 6.07E-09 | 0.56  | 0.70  | -0.14 | 0.2446 |
| ILMN_1758941 | REEP5     | -0.83 | 2.41E-12 | -0.75 | -0.91 | 0.16  | 0.2447 |
| ILMN_2371724 | CEACAM1   | 0.65  | 5.03E-04 | 0.58  | 0.73  | -0.15 | 0.2450 |
| ILMN_1756595 | SH3TC1    | -0.73 | 1.83E-11 | -0.66 | -0.79 | 0.12  | 0.2472 |
| ILMN_1748258 | LINS1     | 0.63  | 6.06E-14 | 0.68  | 0.59  | 0.09  | 0.2472 |
| ILMN_1665865 | IGFBP4    | 1.19  | 1.51E-10 | 1.05  | 1.32  | -0.27 | 0.2473 |
| ILMN_1682197 | NFXL1     | -1.95 | 1.30E-11 | -1.75 | -2.16 | 0.42  | 0.2476 |
| ILMN_1777565 | TAP2      | 1.35  | 1.27E-11 | 1.25  | 1.44  | -0.20 | 0.2488 |
| ILMN_2328666 | CD83      | 1.55  | 9.14E-11 | 1.44  | 1.67  | -0.23 | 0.2499 |
| ILMN_1675674 | UBE4B     | -0.68 | 1.28E-19 | -0.64 | -0.72 | 0.08  | 0.2503 |
| ILMN_1675640 | OAS1      | 3.25  | 9.50E-25 | 3.12  | 3.38  | -0.26 | 0.2517 |
| ILMN_3242211 | TMEM187   | 0.94  | 6.78E-16 | 0.99  | 0.88  | 0.11  | 0.2522 |
| ILMN_2321578 | P2RY10    | 0.93  | 8.08E-13 | 0.99  | 0.87  | 0.12  | 0.2525 |
| ILMN_1765332 | TIMM10    | 0.59  | 5.86E-03 | 0.51  | 0.67  | -0.16 | 0.2539 |
| ILMN_1795715 | DPYD      | -1.10 | 2.00E-15 | -1.02 | -1.17 | 0.16  | 0.2547 |
| ILMN_2407389 | GPNMB     | -1.52 | 2.43E-07 | -1.32 | -1.73 | 0.41  | 0.2557 |
| ILMN_1732831 | CHST7     | -0.80 | 3.64E-07 | -0.73 | -0.86 | 0.13  | 0.2566 |
| ILMN_1671554 | LPIN1     | 0.62  | 5.70E-07 | 0.68  | 0.56  | 0.12  | 0.2571 |
| ILMN_1672496 | DNAJA1    | 0.89  | 1.81E-14 | 0.81  | 0.96  | -0.15 | 0.2591 |
| ILMN_2370573 | XAF1      | 2.57  | 8.44E-15 | 2.44  | 2.70  | -0.26 | 0.2591 |
| ILMN_1723912 | IFI44L    | 4.47  | 2.61E-18 | 4.19  | 4.74  | -0.55 | 0.2596 |
| ILMN_1703263 | SP140     | 1.84  | 2.34E-23 | 1.79  | 1.89  | -0.11 | 0.2605 |
| ILMN_1802603 | RFNG      | -0.72 | 1.02E-06 | -0.62 | -0.82 | 0.20  | 0.2606 |
| ILMN_1689552 | FAM63A    | -0.59 | 9.01E-04 | -0.72 | -0.45 | -0.27 | 0.2614 |
| ILMN_2085012 | TMEM176B  | -0.91 | 6.02E-06 | -0.77 | -1.05 | 0.28  | 0.2616 |
| ILMN_2055165 | MRFAP1    | 0.59  | 2.64E-16 | 0.64  | 0.54  | 0.10  | 0.2626 |
| ILMN_1734707 | CHST13    | -1.04 | 1.20E-09 | -0.92 | -1.16 | 0.24  | 0.2635 |
| ILMN_1663119 | DSC2      | -0.64 | 1.43E-10 | -0.57 | -0.70 | 0.13  | 0.2649 |
| ILMN_2414027 | CKLF      | -0.73 | 1.65E-10 | -0.82 | -0.63 | -0.20 | 0.2651 |
| ILMN_1687978 | PHLDA1    | -0.59 | 1.68E-02 | -0.73 | -0.46 | -0.27 | 0.2652 |
| ILMN_1674609 | CLTB      | -0.61 | 1.37E-11 | -0.55 | -0.68 | 0.12  | 0.2658 |
| ILMN_2088437 | CX3CR1    | -1.01 | 2.67E-03 | -0.91 | -1.10 | 0.19  | 0.2671 |
| ILMN_2043816 | ARPC5L    | 0.76  | 3.56E-12 | 0.82  | 0.70  | 0.12  | 0.2672 |
| ILMN_2148668 | RCBTB2    | -1.31 | 9.20E-14 | -1.21 | -1.41 | 0.20  | 0.2672 |
| ILMN_1732534 | CHMP5     | 1.31  | 1.64E-23 | 1.24  | 1.37  | -0.13 | 0.2677 |
| ILMN_1743032 | CTSS      | -1.56 | 5.89E-14 | -1.44 | -1.67 | 0.23  | 0.2678 |
| ILMN_1779071 | FEZ1      | 0.98  | 3.08E-05 | 0.83  | 1.13  | -0.30 | 0.2680 |
| ILMN_1806692 | HEXB      | -1.52 | 3.54E-18 | -1.46 | -1.58 | 0.12  | 0.2681 |
| ILMN_3275575 | LOC648980 | -0.66 | 1.13E-08 | -0.59 | -0.72 | 0.13  | 0.2681 |

|              |              |       |          |       |       |       |        |
|--------------|--------------|-------|----------|-------|-------|-------|--------|
| ILMN_1727495 | L3MBTL3      | 0.74  | 3.43E-18 | 0.78  | 0.69  | 0.08  | 0.2692 |
| ILMN_1797001 | DDX58        | 2.56  | 3.57E-32 | 2.49  | 2.63  | -0.14 | 0.2694 |
| ILMN_1776038 | UBXN2A       | 0.86  | 1.74E-15 | 0.78  | 0.93  | -0.15 | 0.2702 |
| ILMN_1759341 | MAN2B1       | -1.25 | 1.08E-16 | -1.18 | -1.33 | 0.14  | 0.2718 |
| ILMN_1720799 | TECR         | -0.59 | 4.43E-05 | -0.49 | -0.68 | 0.20  | 0.2720 |
| ILMN_2381197 | RNF19A       | 0.86  | 2.82E-11 | 0.77  | 0.94  | -0.18 | 0.2720 |
| ILMN_2402341 | MAPK3        | -0.74 | 3.80E-09 | -0.66 | -0.83 | 0.18  | 0.2723 |
| ILMN_2070043 | PPM1K        | 0.65  | 9.12E-13 | 0.59  | 0.71  | -0.12 | 0.2748 |
| ILMN_1751615 | COQ10B       | 0.64  | 1.82E-12 | 0.58  | 0.70  | -0.13 | 0.2751 |
| ILMN_1761764 | ALKBH7       | -0.74 | 9.30E-14 | -0.68 | -0.80 | 0.12  | 0.2752 |
| ILMN_1697629 | PLA2G4B      | -0.93 | 1.64E-09 | -0.85 | -1.00 | 0.15  | 0.2753 |
| ILMN_1695423 | CD9          | -2.20 | 7.51E-13 | -2.04 | -2.37 | 0.33  | 0.2753 |
| ILMN_1653039 | LOC642934    | -0.62 | 2.54E-04 | -0.57 | -0.68 | 0.11  | 0.2779 |
| ILMN_2356284 | PFDN5        | -0.63 | 2.77E-16 | -0.59 | -0.68 | 0.10  | 0.2779 |
| ILMN_2232177 | ACTN1        | -0.73 | 3.24E-05 | -0.81 | -0.64 | -0.17 | 0.2791 |
| ILMN_2167416 | MR1          | 0.66  | 2.93E-08 | 0.61  | 0.72  | -0.11 | 0.2795 |
| ILMN_1654262 | ZMAT3        | -0.66 | 1.89E-11 | -0.62 | -0.71 | 0.09  | 0.2797 |
| ILMN_1699160 | ITK          | 0.71  | 1.69E-06 | 0.76  | 0.66  | 0.11  | 0.2799 |
| ILMN_1662198 | RANGAP1      | 0.79  | 4.33E-13 | 0.85  | 0.73  | 0.12  | 0.2824 |
| ILMN_1755974 | ALDOC        | -0.66 | 1.14E-09 | -0.60 | -0.72 | 0.12  | 0.2836 |
| ILMN_3249578 | LOC100132394 | -1.05 | 2.21E-12 | -1.14 | -0.95 | -0.19 | 0.2845 |
| ILMN_1698766 | PYCARD       | -1.44 | 1.85E-19 | -1.36 | -1.51 | 0.15  | 0.2853 |
| ILMN_1693826 | HAVCR2       | 0.87  | 9.13E-07 | 0.79  | 0.95  | -0.16 | 0.2861 |
| ILMN_1721762 | IL18RAP      | 1.49  | 2.05E-11 | 1.40  | 1.57  | -0.17 | 0.2861 |
| ILMN_2307656 | AGTRAP       | -0.60 | 3.33E-05 | -0.52 | -0.67 | 0.16  | 0.2882 |
| ILMN_3201643 | LOC100133019 | 1.24  | 2.38E-24 | 1.19  | 1.28  | -0.09 | 0.2884 |
| ILMN_1693650 | FES          | -0.99 | 1.41E-06 | -1.11 | -0.86 | -0.25 | 0.2887 |
| ILMN_3236945 | PTPMT1       | -0.76 | 3.26E-14 | -0.69 | -0.82 | 0.13  | 0.2891 |
| ILMN_1672605 | C7orf41      | -0.59 | 9.64E-09 | -0.54 | -0.64 | 0.10  | 0.2894 |
| ILMN_1755649 | SLC16A5      | -0.83 | 3.73E-08 | -0.74 | -0.92 | 0.18  | 0.2899 |
| ILMN_1710937 | IFI16        | 1.87  | 1.55E-23 | 1.93  | 1.82  | 0.12  | 0.2900 |
| ILMN_1755658 | ABI3         | -0.65 | 1.68E-09 | -0.58 | -0.72 | 0.14  | 0.2910 |
| ILMN_1668540 | ZNHIT6       | 0.66  | 2.39E-13 | 0.71  | 0.62  | 0.09  | 0.2928 |
| ILMN_2395711 | ARRB2        | -0.75 | 2.83E-12 | -0.82 | -0.69 | -0.13 | 0.2932 |
| ILMN_2198376 | PSMA4        | 0.66  | 3.10E-11 | 0.60  | 0.73  | -0.13 | 0.2936 |
| ILMN_1761072 | LOC653631    | 0.67  | 2.59E-10 | 0.63  | 0.72  | -0.09 | 0.2943 |
| ILMN_2333670 | RNASE1       | -3.42 | 2.99E-09 | -3.03 | -3.81 | 0.78  | 0.2947 |
| ILMN_1745242 | PLSCR1       | 2.55  | 2.08E-25 | 2.48  | 2.62  | -0.14 | 0.2953 |
| ILMN_1756541 | MXD4         | -1.08 | 1.48E-10 | -0.98 | -1.17 | 0.19  | 0.2954 |
| ILMN_1760062 | IFI44        | 3.36  | 4.68E-21 | 3.21  | 3.52  | -0.31 | 0.2956 |
| ILMN_1800225 | PPARG        | -0.78 | 5.50E-07 | -0.67 | -0.88 | 0.21  | 0.2957 |
| ILMN_1704055 | HSPC111      | 0.60  | 2.18E-11 | 0.66  | 0.54  | 0.12  | 0.2959 |
| ILMN_1726666 | GPX3         | -1.19 | 2.79E-13 | -1.08 | -1.29 | 0.21  | 0.2970 |
| ILMN_3301324 | LOC729301    | -0.79 | 4.52E-12 | -0.73 | -0.84 | 0.11  | 0.2972 |
| ILMN_1665483 | KIAA0020     | 0.68  | 6.72E-12 | 0.73  | 0.63  | 0.10  | 0.2981 |
| ILMN_2130514 | FAM76B       | 0.66  | 3.49E-12 | 0.71  | 0.62  | 0.09  | 0.2983 |
| ILMN_2391512 | NAAA         | -0.74 | 5.79E-11 | -0.69 | -0.80 | 0.11  | 0.2990 |
| ILMN_1724609 | SLC2A8       | -0.63 | 1.72E-05 | -0.55 | -0.71 | 0.16  | 0.2994 |
| ILMN_2064606 | TBC1D2B      | -0.66 | 5.96E-10 | -0.59 | -0.74 | 0.14  | 0.2997 |
| ILMN_1663916 | ARHGAP9      | -0.61 | 2.43E-07 | -0.54 | -0.68 | 0.14  | 0.3004 |
| ILMN_3300471 | LOC730255    | -0.99 | 3.25E-08 | -1.07 | -0.92 | -0.15 | 0.3006 |
| ILMN_1809866 | WDR74        | 0.59  | 1.07E-08 | 0.65  | 0.53  | 0.11  | 0.3015 |
| ILMN_1827736 |              | -0.81 | 3.96E-11 | -0.75 | -0.87 | 0.12  | 0.3025 |
| ILMN_2414325 | TNFAIP8      | 0.95  | 1.96E-16 | 0.89  | 1.01  | -0.12 | 0.3029 |
| ILMN_1701911 | C5orf20      | -0.86 | 4.63E-08 | -0.75 | -0.97 | 0.23  | 0.3038 |
| ILMN_1699931 | HCST         | -0.99 | 1.05E-14 | -0.93 | -1.05 | 0.11  | 0.3039 |
| ILMN_1811754 | NDUFB10      | -0.72 | 1.11E-14 | -0.67 | -0.78 | 0.11  | 0.3044 |
| ILMN_1652736 | RPS6KA3      | -0.86 | 6.98E-18 | -0.91 | -0.80 | -0.11 | 0.3046 |
| ILMN_1704286 | FXYS5        | -0.65 | 6.40E-06 | -0.59 | -0.72 | 0.13  | 0.3046 |
| ILMN_1740938 | APOE         | -0.84 | 2.06E-06 | -0.71 | -0.98 | 0.27  | 0.3051 |
| ILMN_1745994 | GAS7         | -2.17 | 6.53E-21 | -2.08 | -2.26 | 0.18  | 0.3054 |
| ILMN_3305938 | SGK1         | -1.20 | 4.86E-08 | -1.31 | -1.09 | -0.22 | 0.3055 |
| ILMN_2096372 | ALDH1A1      | -0.62 | 8.50E-09 | -0.54 | -0.70 | 0.16  | 0.3061 |
| ILMN_1786429 | P2RY5        | -0.59 | 2.28E-05 | -0.50 | -0.68 | 0.18  | 0.3062 |
| ILMN_1714965 | NFKB1        | 0.59  | 7.18E-11 | 0.55  | 0.64  | -0.10 | 0.3071 |
| ILMN_1665583 | TUBB         | 0.66  | 1.53E-08 | 0.61  | 0.71  | -0.10 | 0.3072 |
| ILMN_1680774 | LOC730994    | -0.67 | 3.97E-06 | -0.61 | -0.73 | 0.13  | 0.3082 |
| ILMN_1724250 | GRN          | -1.24 | 1.27E-06 | -1.36 | -1.12 | -0.25 | 0.3097 |
| ILMN_1767509 | DEF8         | -1.15 | 9.77E-13 | -1.07 | -1.24 | 0.17  | 0.3097 |
| ILMN_1681252 | C17orf44     | -0.71 | 1.96E-10 | -0.65 | -0.77 | 0.11  | 0.3100 |
| ILMN_1762825 | CANX         | -0.85 | 1.43E-11 | -0.79 | -0.91 | 0.12  | 0.3103 |
| ILMN_1687315 | RXRA         | -2.18 | 2.50E-18 | -2.25 | -2.11 | -0.14 | 0.3122 |
| ILMN_3200330 | LOC399988    | 0.84  | 1.28E-13 | 0.79  | 0.89  | -0.10 | 0.3124 |
| ILMN_1668822 | BATF         | 1.21  | 7.24E-16 | 1.14  | 1.28  | -0.14 | 0.3128 |



|              |              |       |          |       |       |       |        |
|--------------|--------------|-------|----------|-------|-------|-------|--------|
| ILMN_1815734 | FCBSD2       | 0.71  | 6.22E-11 | 0.78  | 0.64  | 0.14  | 0.3133 |
| ILMN_1808374 | SNTB2        | -0.70 | 5.79E-15 | -0.65 | -0.74 | 0.09  | 0.3141 |
| ILMN_1692072 | LOC728006    | -0.83 | 4.72E-14 | -0.79 | -0.88 | 0.09  | 0.3149 |
| ILMN_2366388 | PRDX1        | -0.78 | 9.24E-09 | -0.86 | -0.70 | -0.16 | 0.3149 |
| ILMN_1788538 | NCALD        | 0.73  | 2.42E-06 | 0.68  | 0.78  | -0.11 | 0.3149 |
| ILMN_2390299 | PSMB8        | 0.76  | 7.88E-15 | 0.71  | 0.80  | -0.09 | 0.3151 |
| ILMN_1745807 | TMEM62       | 1.22  | 2.23E-24 | 1.17  | 1.26  | -0.09 | 0.3158 |
| ILMN_1726591 | CARD16       | 0.94  | 1.48E-13 | 0.88  | 1.01  | -0.13 | 0.3173 |
| ILMN_2371169 | ZYX          | -1.22 | 1.59E-12 | -1.28 | -1.16 | -0.12 | 0.3190 |
| ILMN_2413084 | HSPA8        | 0.76  | 2.31E-14 | 0.71  | 0.80  | -0.09 | 0.3199 |
| ILMN_2106449 | PLEKHF2      | 0.59  | 3.67E-10 | 0.54  | 0.64  | -0.10 | 0.3204 |
| ILMN_2173975 | RTP4         | 2.85  | 4.33E-27 | 2.77  | 2.92  | -0.16 | 0.3205 |
| ILMN_1656420 | MGC3020      | 0.59  | 8.02E-07 | 0.52  | 0.65  | -0.13 | 0.3213 |
| ILMN_1716563 | PRKCB1       | -0.92 | 4.06E-15 | -0.87 | -0.97 | 0.10  | 0.3214 |
| ILMN_1729749 | HERC5        | 2.87  | 8.13E-24 | 2.76  | 2.98  | -0.22 | 0.3231 |
| ILMN_2294978 | RNASE4       | -0.60 | 8.67E-05 | -0.48 | -0.71 | 0.22  | 0.3233 |
| ILMN_1761281 | LOC441019    | 1.58  | 4.56E-15 | 1.49  | 1.68  | -0.19 | 0.3248 |
| ILMN_2391861 | GSTM1        | -0.82 | 2.41E-02 | -0.76 | -0.88 | 0.12  | 0.3261 |
| ILMN_1686388 | LOC644330    | 0.96  | 1.64E-12 | 0.89  | 1.02  | -0.13 | 0.3267 |
| ILMN_1712684 | FAM20C       | -1.50 | 9.49E-15 | -1.60 | -1.39 | -0.20 | 0.3284 |
| ILMN_1723962 | LXN          | -0.77 | 4.12E-07 | -0.68 | -0.87 | 0.20  | 0.3291 |
| ILMN_2060115 | SORL1        | -1.29 | 5.80E-12 | -1.20 | -1.37 | 0.16  | 0.3319 |
| ILMN_1681644 | BIRC3        | 0.65  | 1.53E-11 | 0.59  | 0.71  | -0.12 | 0.3324 |
| ILMN_1707945 | HELB         | 0.98  | 2.32E-16 | 0.92  | 1.04  | -0.12 | 0.3339 |
| ILMN_1711102 | B3GNT2       | 1.32  | 1.32E-25 | 1.27  | 1.36  | -0.09 | 0.3342 |
| ILMN_2402798 | AP2M1        | -0.61 | 4.78E-13 | -0.56 | -0.65 | 0.09  | 0.3348 |
| ILMN_1763436 | SETX         | 0.71  | 7.69E-14 | 0.66  | 0.76  | -0.10 | 0.3355 |
| ILMN_1898723 |              | -0.62 | 1.70E-09 | -0.56 | -0.67 | 0.11  | 0.3356 |
| ILMN_2336609 | SYTL2        | 0.87  | 4.72E-08 | 0.81  | 0.93  | -0.11 | 0.3356 |
| ILMN_2186806 | HLA-F        | 0.69  | 3.95E-08 | 0.64  | 0.73  | -0.10 | 0.3360 |
| ILMN_2129015 | AFF1         | 0.69  | 4.40E-13 | 0.74  | 0.65  | 0.10  | 0.3363 |
| ILMN_1806165 | HSPA6        | -1.55 | 2.28E-11 | -1.67 | -1.42 | -0.25 | 0.3364 |
| ILMN_1686116 | THBS1        | -2.22 | 1.91E-05 | -1.94 | -2.51 | 0.57  | 0.3365 |
| ILMN_3307930 | RAN          | 0.64  | 2.29E-12 | 0.70  | 0.59  | 0.12  | 0.3365 |
| ILMN_1779252 | TRIM22       | 2.66  | 4.40E-23 | 2.56  | 2.76  | -0.20 | 0.3366 |
| ILMN_1677085 | RGS19        | -0.61 | 5.24E-08 | -0.67 | -0.56 | -0.11 | 0.3366 |
| ILMN_2363668 | YIF1B        | -0.63 | 3.02E-14 | -0.58 | -0.68 | 0.10  | 0.3368 |
| ILMN_1668605 | NAAA         | -0.79 | 4.47E-10 | -0.74 | -0.85 | 0.11  | 0.3379 |
| ILMN_1651557 | KDELC2       | 1.02  | 2.47E-18 | 0.97  | 1.06  | -0.09 | 0.3395 |
| ILMN_3243471 | CNPY2        | -0.61 | 7.78E-16 | -0.57 | -0.65 | 0.08  | 0.3397 |
| ILMN_1782459 | OSBPL8       | -0.74 | 2.20E-10 | -0.79 | -0.69 | -0.10 | 0.3398 |
| ILMN_2307598 | SLC37A3      | 0.66  | 4.04E-12 | 0.71  | 0.61  | 0.10  | 0.3402 |
| ILMN_1695311 | HLA-DMA      | -1.76 | 5.14E-17 | -1.84 | -1.67 | -0.17 | 0.3408 |
| ILMN_1654488 | UTX          | 0.87  | 7.22E-10 | 0.80  | 0.93  | -0.13 | 0.3424 |
| ILMN_3279306 | LOC100132742 | -0.76 | 3.70E-10 | -0.72 | -0.81 | 0.09  | 0.3426 |
| ILMN_1679797 | ADARB1       | -0.77 | 7.54E-17 | -0.81 | -0.74 | -0.08 | 0.3429 |
| ILMN_1802557 | HEBP1        | -0.94 | 8.39E-12 | -0.99 | -0.88 | -0.11 | 0.3436 |
| ILMN_1695058 | SLC38A5      | 1.05  | 5.45E-18 | 1.12  | 0.99  | 0.13  | 0.3438 |
| ILMN_1694398 | EIF3F        | -0.61 | 3.43E-09 | -0.56 | -0.66 | 0.11  | 0.3439 |
| ILMN_1755620 | IER5L        | -0.83 | 1.94E-15 | -0.77 | -0.89 | 0.12  | 0.3439 |
| ILMN_1809040 | LDLRAP1      | -0.82 | 3.23E-06 | -0.77 | -0.86 | 0.08  | 0.3442 |
| ILMN_1798061 | ZFYVE26      | 0.63  | 4.71E-13 | 0.68  | 0.59  | 0.10  | 0.3444 |
| ILMN_1703650 | TNIP1        | 0.62  | 2.24E-07 | 0.55  | 0.69  | -0.14 | 0.3446 |
| ILMN_3307729 | CXXC5        | -1.24 | 1.42E-14 | -1.15 | -1.33 | 0.18  | 0.3454 |
| ILMN_1666594 | IRF8         | 0.62  | 8.21E-07 | 0.55  | 0.69  | -0.13 | 0.3461 |
| ILMN_1662587 | PNPLA7       | -0.73 | 5.20E-06 | -0.66 | -0.79 | 0.13  | 0.3463 |
| ILMN_1803819 | IQGAP1       | -0.61 | 5.92E-07 | -0.56 | -0.66 | 0.11  | 0.3464 |
| ILMN_1683658 | FKBP1A       | -0.73 | 6.62E-08 | -0.80 | -0.66 | -0.14 | 0.3467 |
| ILMN_1738229 | NDRG3        | -0.71 | 1.03E-08 | -0.65 | -0.78 | 0.13  | 0.3468 |
| ILMN_1741133 | NME1         | 0.84  | 1.57E-07 | 0.95  | 0.73  | 0.22  | 0.3471 |
| ILMN_1768534 | BHLHB2       | 1.06  | 1.83E-11 | 0.98  | 1.14  | -0.16 | 0.3483 |
| ILMN_2345353 | LST1         | -1.57 | 6.10E-19 | -1.62 | -1.52 | -0.10 | 0.3494 |
| ILMN_2326713 | CD151        | -1.15 | 1.42E-09 | -1.20 | -1.09 | -0.11 | 0.3494 |
| ILMN_1727098 | PPP1R16B     | 0.60  | 7.10E-09 | 0.65  | 0.55  | 0.10  | 0.3514 |
| ILMN_1663751 | CYCSL1       | 0.66  | 4.92E-07 | 0.59  | 0.73  | -0.14 | 0.3519 |
| ILMN_1806651 | PARP8        | 0.96  | 9.37E-10 | 0.92  | 1.00  | -0.09 | 0.3528 |
| ILMN_1756928 | RTN1         | -2.58 | 1.11E-16 | -2.50 | -2.66 | 0.16  | 0.3529 |
| ILMN_3306672 | PATL2        | 0.82  | 3.19E-05 | 0.88  | 0.76  | 0.12  | 0.3536 |
| ILMN_1813277 | SUPT3H       | 0.98  | 1.69E-19 | 1.03  | 0.94  | 0.09  | 0.3538 |
| ILMN_1690921 | STAT2        | 1.51  | 9.39E-21 | 1.45  | 1.58  | -0.13 | 0.3539 |
| ILMN_1813685 | RAB7L1       | 1.02  | 9.71E-15 | 0.97  | 1.07  | -0.10 | 0.3549 |
| ILMN_1814282 | ISG20L1      | 0.72  | 2.61E-13 | 0.77  | 0.67  | 0.10  | 0.3549 |
| ILMN_2078592 | C6orf105     | 1.10  | 9.96E-09 | 1.18  | 1.02  | 0.16  | 0.3563 |
| ILMN_1796497 | PIP3-E       | 0.62  | 9.86E-10 | 0.66  | 0.58  | 0.09  | 0.3572 |

|              |              |       |          |       |       |       |        |
|--------------|--------------|-------|----------|-------|-------|-------|--------|
| ILMN_1814737 | LNPEP        | 0.83  | 2.71E-17 | 0.79  | 0.87  | -0.08 | 0.3580 |
| ILMN_1913678 |              | -1.40 | 1.01E-10 | -1.31 | -1.48 | 0.17  | 0.3590 |
| ILMN_1770641 | KLHL3        | -0.73 | 2.78E-07 | -0.77 | -0.69 | -0.08 | 0.3606 |
| ILMN_3229324 | SGK1         | -1.12 | 2.48E-06 | -1.23 | -1.01 | -0.22 | 0.3609 |
| ILMN_2352921 | BPGM         | 0.93  | 1.43E-12 | 0.86  | 1.00  | -0.14 | 0.3614 |
| ILMN_2140990 | CAMK1        | -1.67 | 5.39E-17 | -1.76 | -1.58 | -0.18 | 0.3616 |
| ILMN_1657361 | CBX7         | -1.50 | 1.88E-17 | -1.44 | -1.56 | 0.12  | 0.3620 |
| ILMN_2355559 | PSAP         | -1.07 | 6.17E-10 | -1.14 | -1.00 | -0.13 | 0.3642 |
| ILMN_1797728 | HMGCS1       | 0.75  | 6.06E-14 | 0.69  | 0.80  | -0.12 | 0.3656 |
| ILMN_1706015 | FAM43A       | -0.61 | 2.40E-10 | -0.56 | -0.66 | 0.10  | 0.3670 |
| ILMN_1666206 | GSDMB        | 1.24  | 2.80E-14 | 1.29  | 1.18  | 0.11  | 0.3673 |
| ILMN_1717234 | CAST         | 0.73  | 1.33E-09 | 0.68  | 0.77  | -0.09 | 0.3680 |
| ILMN_1757072 | LOC642489    | -0.69 | 7.41E-08 | -0.75 | -0.63 | -0.12 | 0.3686 |
| ILMN_3299520 | PRKCB        | -1.30 | 5.85E-18 | -1.25 | -1.34 | 0.09  | 0.3688 |
| ILMN_1780769 | TUBB2C       | 0.81  | 2.11E-09 | 0.75  | 0.87  | -0.12 | 0.3689 |
| ILMN_1769550 | SLFN5        | 1.20  | 1.16E-12 | 1.29  | 1.11  | 0.18  | 0.3697 |
| ILMN_3280565 | LOC389342    | -0.74 | 8.44E-06 | -0.81 | -0.66 | -0.15 | 0.3700 |
| ILMN_2112357 | CD300LF      | -0.97 | 1.28E-05 | -1.08 | -0.86 | -0.22 | 0.3700 |
| ILMN_1680925 | SLC9A3R1     | -0.65 | 7.47E-11 | -0.60 | -0.70 | 0.09  | 0.3703 |
| ILMN_1788160 | KIF5B        | 0.60  | 2.31E-12 | 0.56  | 0.65  | -0.09 | 0.3726 |
| ILMN_1771376 | PEA15        | -1.01 | 5.54E-09 | -1.07 | -0.95 | -0.12 | 0.3728 |
| ILMN_2396444 | CD14         | -2.13 | 8.29E-07 | -2.31 | -1.96 | -0.35 | 0.3729 |
| ILMN_1795285 | PHF15        | 0.69  | 5.15E-09 | 0.74  | 0.65  | 0.09  | 0.3737 |
| ILMN_1772692 | DICER1       | -0.92 | 3.62E-15 | -0.87 | -0.97 | 0.10  | 0.3741 |
| ILMN_1745607 | A2M          | -0.72 | 5.12E-12 | -0.78 | -0.66 | -0.12 | 0.3755 |
| ILMN_1856480 |              | -0.88 | 4.81E-17 | -0.84 | -0.93 | 0.09  | 0.3764 |
| ILMN_1752226 | P2RY11       | -0.67 | 1.38E-07 | -0.61 | -0.73 | 0.12  | 0.3766 |
| ILMN_1694466 | ZBED1        | -0.63 | 1.36E-08 | -0.57 | -0.69 | 0.12  | 0.3772 |
| ILMN_1683700 | TNFSF12      | -0.66 | 2.59E-09 | -0.61 | -0.71 | 0.10  | 0.3785 |
| ILMN_1730816 | GPR162       | -3.19 | 5.73E-18 | -3.06 | -3.33 | 0.27  | 0.3793 |
| ILMN_1786722 | ZNF385A      | -0.98 | 3.08E-11 | -0.92 | -1.04 | 0.12  | 0.3794 |
| ILMN_2367165 | ABTB1        | -0.59 | 1.22E-06 | -0.52 | -0.66 | 0.14  | 0.3795 |
| ILMN_1663142 | CLEC12A      | -1.31 | 6.49E-06 | -1.44 | -1.18 | -0.26 | 0.3805 |
| ILMN_2181968 | CBL          | -0.65 | 1.89E-11 | -0.60 | -0.70 | 0.10  | 0.3806 |
| ILMN_3298215 | LOC729340    | -0.99 | 1.03E-08 | -1.05 | -0.93 | -0.12 | 0.3819 |
| ILMN_1719543 | MAF          | 0.64  | 4.63E-05 | 0.70  | 0.59  | 0.12  | 0.3824 |
| ILMN_1723706 | GRAMD4       | -0.77 | 9.18E-13 | -0.71 | -0.83 | 0.12  | 0.3825 |
| ILMN_2145518 | TMEM126B     | 0.68  | 1.48E-11 | 0.74  | 0.63  | 0.12  | 0.3829 |
| ILMN_3292056 | LOC727984    | -0.75 | 9.40E-07 | -0.80 | -0.69 | -0.11 | 0.3849 |
| ILMN_2160476 | CCL22        | 1.73  | 2.44E-08 | 1.55  | 1.90  | -0.35 | 0.3869 |
| ILMN_2368292 | TSEN34       | -0.63 | 7.81E-11 | -0.58 | -0.68 | 0.10  | 0.3873 |
| ILMN_2383435 | PSMD10       | 0.64  | 1.60E-13 | 0.69  | 0.60  | 0.09  | 0.3875 |
| ILMN_1712389 | CKLF         | -0.76 | 2.66E-11 | -0.83 | -0.68 | -0.15 | 0.3899 |
| ILMN_1715131 | CCR7         | 1.30  | 2.24E-16 | 1.26  | 1.35  | -0.09 | 0.3902 |
| ILMN_1791511 | TMEM176A     | -1.00 | 1.10E-05 | -0.89 | -1.11 | 0.22  | 0.3905 |
| ILMN_1745256 | CXXC5        | -1.22 | 4.42E-15 | -1.14 | -1.30 | 0.16  | 0.3921 |
| ILMN_1743373 | DLL1         | 1.23  | 8.70E-15 | 1.18  | 1.28  | -0.09 | 0.3935 |
| ILMN_3234615 | LOC728650    | -0.70 | 2.11E-11 | -0.65 | -0.75 | 0.11  | 0.3947 |
| ILMN_1788810 | C12orf30     | 0.60  | 1.14E-14 | 0.63  | 0.56  | 0.07  | 0.3949 |
| ILMN_2255579 | RAB37        | -0.68 | 1.28E-11 | -0.73 | -0.63 | -0.10 | 0.3950 |
| ILMN_1688373 | LST1         | -1.46 | 2.95E-18 | -1.50 | -1.41 | -0.10 | 0.3951 |
| ILMN_2115434 | RAB32        | -1.35 | 3.54E-08 | -1.44 | -1.26 | -0.18 | 0.3951 |
| ILMN_1734353 | GPX4         | -1.12 | 1.61E-12 | -1.17 | -1.07 | -0.10 | 0.3954 |
| ILMN_1722622 | CD163        | -1.40 | 6.88E-04 | -1.62 | -1.17 | -0.45 | 0.3964 |
| ILMN_1697559 | G6PD         | -0.90 | 1.07E-07 | -0.97 | -0.83 | -0.15 | 0.3967 |
| ILMN_1780582 | CD83         | 1.25  | 5.91E-10 | 1.18  | 1.32  | -0.15 | 0.3975 |
| ILMN_1733538 | RGS10        | -0.62 | 1.29E-06 | -0.58 | -0.66 | 0.08  | 0.3976 |
| ILMN_1773906 | NCOA4        | -0.66 | 6.91E-11 | -0.62 | -0.70 | 0.09  | 0.3992 |
| ILMN_1788283 | COTL1        | -1.02 | 1.54E-10 | -0.94 | -1.10 | 0.15  | 0.4023 |
| ILMN_1715401 | MT1G         | -1.01 | 1.17E-02 | -1.22 | -0.79 | -0.43 | 0.4033 |
| ILMN_1653292 | PFKFB4       | -1.19 | 2.75E-12 | -1.13 | -1.25 | 0.12  | 0.4034 |
| ILMN_1803392 | TAX1BP3      | -0.76 | 1.94E-09 | -0.82 | -0.71 | -0.12 | 0.4051 |
| ILMN_2400947 | CUGBP2       | -0.69 | 5.64E-10 | -0.65 | -0.73 | 0.08  | 0.4070 |
| ILMN_2373495 | H2AFY        | -0.77 | 3.93E-12 | -0.73 | -0.81 | 0.08  | 0.4075 |
| ILMN_2185665 | PGAP1        | 1.19  | 9.28E-21 | 1.23  | 1.15  | 0.08  | 0.4076 |
| ILMN_1723043 | NAPSB        | 1.17  | 5.57E-13 | 1.12  | 1.23  | -0.12 | 0.4084 |
| ILMN_2078599 | ACP5         | -2.22 | 2.44E-19 | -2.31 | -2.12 | -0.19 | 0.4093 |
| ILMN_1746588 | TALDO1       | -0.86 | 3.18E-10 | -0.90 | -0.81 | -0.09 | 0.4112 |
| ILMN_1681703 | FOXO3        | -0.76 | 3.96E-07 | -0.70 | -0.82 | 0.12  | 0.4135 |
| ILMN_1780533 | RNASE6       | -2.60 | 1.01E-11 | -2.43 | -2.77 | 0.34  | 0.4140 |
| ILMN_1810191 | PLA2G4C      | -1.07 | 2.24E-06 | -1.16 | -0.99 | -0.17 | 0.4140 |
| ILMN_2053921 | CAPZB        | -0.89 | 3.47E-11 | -0.82 | -0.97 | 0.15  | 0.4142 |
| ILMN_1705224 | TMEM110      | 0.76  | 1.02E-12 | 0.71  | 0.81  | -0.10 | 0.4151 |
| ILMN_3260070 | LOC100128266 | 0.66  | 1.78E-12 | 0.71  | 0.62  | 0.09  | 0.4169 |

|              |              |       |          |       |       |       |        |
|--------------|--------------|-------|----------|-------|-------|-------|--------|
| ILMN_1736751 | VPS26B       | -0.63 | 4.43E-14 | -0.59 | -0.67 | 0.08  | 0.4185 |
| ILMN_1797531 | PRKAG2       | 0.76  | 1.44E-12 | 0.80  | 0.71  | 0.09  | 0.4188 |
| ILMN_1671452 | MRPL44       | 0.62  | 1.86E-09 | 0.58  | 0.66  | -0.08 | 0.4209 |
| ILMN_3271122 | LOC100129742 | -0.74 | 2.54E-04 | -0.79 | -0.69 | -0.10 | 0.4211 |
| ILMN_1669788 | NUDT14       | -0.61 | 1.06E-05 | -0.67 | -0.55 | -0.13 | 0.4218 |
| ILMN_1757467 | H1FO         | -0.70 | 1.92E-02 | -0.79 | -0.61 | -0.19 | 0.4222 |
| ILMN_1776723 | PHF11        | 1.67  | 1.84E-23 | 1.62  | 1.71  | -0.09 | 0.4223 |
| ILMN_1745954 | CORO1C       | -1.02 | 2.40E-09 | -1.08 | -0.97 | -0.11 | 0.4223 |
| ILMN_2347798 | IFI6         | 3.41  | 7.06E-24 | 3.30  | 3.53  | -0.23 | 0.4232 |
| ILMN_1695851 | PARVG        | -0.95 | 5.33E-18 | -0.91 | -0.99 | 0.08  | 0.4233 |
| ILMN_1669927 | ICOS         | 1.44  | 1.51E-13 | 1.39  | 1.49  | -0.10 | 0.4236 |
| ILMN_1693192 | PI3          | 1.56  | 1.02E-02 | 1.34  | 1.79  | -0.45 | 0.4238 |
| ILMN_1713636 | S100A6       | -0.89 | 2.38E-11 | -0.94 | -0.83 | -0.10 | 0.4243 |
| ILMN_1745397 | OAS3         | 3.84  | 6.96E-26 | 3.74  | 3.93  | -0.19 | 0.4249 |
| ILMN_1785158 | HERPUD2      | 0.63  | 3.69E-12 | 0.67  | 0.60  | 0.08  | 0.4266 |
| ILMN_1810608 | PNPT1        | 1.47  | 2.47E-21 | 1.51  | 1.42  | 0.09  | 0.4268 |
| ILMN_1716026 | ARMCX6       | 0.60  | 3.22E-12 | 0.57  | 0.64  | -0.07 | 0.4299 |
| ILMN_1681591 | PTPN1        | 0.69  | 5.49E-10 | 0.74  | 0.64  | 0.10  | 0.4328 |
| ILMN_1719695 | NFKBIZ       | 1.32  | 1.31E-17 | 1.25  | 1.38  | -0.13 | 0.4330 |
| ILMN_2228180 | MSRA         | -0.73 | 1.86E-09 | -0.69 | -0.78 | 0.09  | 0.4337 |
| ILMN_1766851 | TMEM126B     | 0.77  | 2.22E-16 | 0.81  | 0.72  | 0.08  | 0.4338 |
| ILMN_1751492 | FAM18B       | 0.80  | 2.32E-16 | 0.77  | 0.83  | -0.07 | 0.4351 |
| ILMN_1749070 | HLA-DPB1     | -1.33 | 2.67E-08 | -1.41 | -1.25 | -0.17 | 0.4360 |
| ILMN_1770290 | CNN2         | -1.00 | 3.67E-10 | -0.95 | -1.05 | 0.10  | 0.4361 |
| ILMN_2384216 | XRN1         | 0.81  | 6.10E-19 | 0.85  | 0.77  | 0.07  | 0.4381 |
| ILMN_1667239 | INPP1        | 0.78  | 9.46E-10 | 0.74  | 0.82  | -0.09 | 0.4387 |
| ILMN_1697420 | TINF2        | 0.87  | 1.08E-16 | 0.91  | 0.84  | 0.07  | 0.4397 |
| ILMN_3246953 | FTSJD2       | 1.73  | 5.44E-25 | 1.69  | 1.77  | -0.08 | 0.4397 |
| ILMN_1653599 | ATP5D        | -0.63 | 4.37E-05 | -0.56 | -0.70 | 0.14  | 0.4397 |
| ILMN_1812618 | ARAP3        | -1.10 | 1.08E-11 | -1.14 | -1.05 | -0.09 | 0.4397 |
| ILMN_1784863 | CD36         | -3.68 | 1.55E-23 | -3.62 | -3.75 | 0.13  | 0.4401 |
| ILMN_1739541 | NMI          | 0.84  | 2.72E-09 | 0.78  | 0.89  | -0.11 | 0.4402 |
| ILMN_2109197 | EPB41L3      | -1.60 | 5.32E-08 | -1.70 | -1.50 | -0.20 | 0.4419 |
| ILMN_2387799 | PDPK1        | -0.64 | 3.29E-15 | -0.61 | -0.68 | 0.07  | 0.4420 |
| ILMN_1660027 | FCGR2B       | -1.10 | 1.27E-06 | -1.22 | -0.97 | -0.24 | 0.4422 |
| ILMN_1790692 | GNLY         | 0.71  | 7.18E-03 | 0.65  | 0.78  | -0.13 | 0.4423 |
| ILMN_1696419 | STOM         | 1.61  | 7.34E-16 | 1.56  | 1.66  | -0.10 | 0.4434 |
| ILMN_2198515 | ARRDC3       | 0.75  | 3.87E-11 | 0.80  | 0.70  | 0.10  | 0.4442 |
| ILMN_2325168 | ARRB1        | -1.05 | 1.87E-14 | -1.10 | -1.01 | -0.10 | 0.4446 |
| ILMN_1797964 | ARL6IP6      | 0.80  | 1.42E-14 | 0.75  | 0.85  | -0.11 | 0.4448 |
| ILMN_1675186 | ME2          | 1.04  | 3.51E-21 | 1.07  | 1.01  | 0.06  | 0.4460 |
| ILMN_1761083 | HNRNPA3      | 1.01  | 9.46E-14 | 1.07  | 0.96  | 0.11  | 0.4476 |
| ILMN_1661593 | FAM18B       | 0.75  | 1.76E-17 | 0.71  | 0.78  | -0.08 | 0.4479 |
| ILMN_1728662 | ALDH3B1      | -1.37 | 1.74E-10 | -1.44 | -1.30 | -0.14 | 0.4482 |
| ILMN_3251723 | PNPT1        | 1.08  | 1.70E-09 | 1.02  | 1.15  | -0.13 | 0.4486 |
| ILMN_1654639 | HERC6        | 3.33  | 1.66E-26 | 3.26  | 3.40  | -0.13 | 0.4492 |
| ILMN_2225144 | EIF4E3       | 0.92  | 1.69E-12 | 0.87  | 0.97  | -0.10 | 0.4494 |
| ILMN_1756793 | POLS         | 0.95  | 3.04E-16 | 0.91  | 0.99  | -0.08 | 0.4510 |
| ILMN_3306440 | TMEM194A     | 0.60  | 7.17E-08 | 0.54  | 0.65  | -0.11 | 0.4513 |
| ILMN_1677793 | P2RX5        | 0.91  | 1.99E-08 | 0.83  | 0.99  | -0.16 | 0.4520 |
| ILMN_2406410 | RHBDD2       | -0.81 | 2.15E-05 | -0.90 | -0.72 | -0.17 | 0.4521 |
| ILMN_2136089 | MTE          | 0.85  | 2.56E-06 | 0.76  | 0.94  | -0.18 | 0.4529 |
| ILMN_1807981 | SIGIRR       | -1.25 | 2.18E-11 | -1.31 | -1.19 | -0.12 | 0.4530 |
| ILMN_1757877 | HCFC1R1      | -0.84 | 7.61E-06 | -0.76 | -0.92 | 0.16  | 0.4538 |
| ILMN_2062714 | PTGDR        | -0.69 | 9.40E-12 | -0.65 | -0.74 | 0.08  | 0.4547 |
| ILMN_1798233 | PSMB9        | 0.61  | 9.36E-10 | 0.57  | 0.65  | -0.09 | 0.4552 |
| ILMN_1707979 | CARD17       | 0.71  | 4.73E-14 | 0.75  | 0.67  | 0.08  | 0.4556 |
| ILMN_2404154 | SERPINA1     | -1.05 | 1.09E-04 | -1.17 | -0.94 | -0.23 | 0.4562 |
| ILMN_1721134 | TGM1         | 1.06  | 1.80E-18 | 1.01  | 1.10  | -0.09 | 0.4572 |
| ILMN_3199438 | LOC440366    | 0.65  | 1.67E-14 | 0.62  | 0.69  | -0.07 | 0.4572 |
| ILMN_1700831 | SLC27A2      | 0.59  | 1.35E-06 | 0.53  | 0.65  | -0.12 | 0.4573 |
| ILMN_1740200 | LOC728216    | 1.52  | 1.65E-21 | 1.47  | 1.56  | -0.10 | 0.4581 |
| ILMN_1705403 | CYP2S1       | -1.28 | 4.60E-15 | -1.22 | -1.35 | 0.12  | 0.4584 |
| ILMN_1790978 | ATG7         | -0.94 | 4.81E-06 | -0.88 | -1.00 | 0.12  | 0.4598 |
| ILMN_1815292 | RPL7         | -0.73 | 2.58E-06 | -0.68 | -0.77 | 0.09  | 0.4600 |
| ILMN_1788017 | HSH2D        | 2.36  | 4.01E-27 | 2.31  | 2.40  | -0.09 | 0.4610 |
| ILMN_3289352 | LOC642828    | -0.75 | 5.31E-04 | -0.79 | -0.71 | -0.08 | 0.4613 |
| ILMN_1765994 | ZBP1         | 2.67  | 1.95E-24 | 2.61  | 2.74  | -0.13 | 0.4614 |
| ILMN_1751789 | HNMT         | -1.31 | 4.92E-12 | -1.37 | -1.25 | -0.12 | 0.4618 |
| ILMN_2109416 | NAPSB        | 1.47  | 9.17E-11 | 1.40  | 1.53  | -0.13 | 0.4624 |
| ILMN_2074258 | BARD1        | 0.77  | 6.69E-12 | 0.73  | 0.80  | -0.07 | 0.4626 |
| ILMN_2183687 | LIME1        | -1.89 | 3.36E-20 | -1.94 | -1.84 | -0.10 | 0.4627 |
| ILMN_1674285 | LOC401233    | -0.75 | 1.36E-05 | -0.68 | -0.81 | 0.13  | 0.4649 |
| ILMN_2125017 | TIGIT        | 0.78  | 5.92E-07 | 0.82  | 0.75  | 0.08  | 0.4658 |

|              |              |       |          |       |       |       |        |
|--------------|--------------|-------|----------|-------|-------|-------|--------|
| ILMN_1858599 |              | 0.81  | 7.57E-13 | 0.85  | 0.78  | 0.07  | 0.4667 |
| ILMN_2201966 | N4BP1        | 1.30  | 4.17E-16 | 1.35  | 1.26  | 0.09  | 0.4676 |
| ILMN_1655710 | LOC642989    | -0.62 | 4.41E-03 | -0.67 | -0.56 | -0.11 | 0.4680 |
| ILMN_1660341 | LRPAP1       | -0.65 | 1.67E-07 | -0.62 | -0.68 | 0.06  | 0.4696 |
| ILMN_1803676 | ENOSF1       | -0.60 | 2.50E-09 | -0.57 | -0.62 | 0.05  | 0.4699 |
| ILMN_1789005 | ATP6V0C      | -0.77 | 2.38E-10 | -0.81 | -0.74 | -0.08 | 0.4708 |
| ILMN_1782851 | TAPBP        | 0.65  | 6.35E-10 | 0.61  | 0.69  | -0.07 | 0.4740 |
| ILMN_1739156 | DOPEY1       | 0.78  | 2.60E-15 | 0.74  | 0.82  | -0.08 | 0.4750 |
| ILMN_1703695 | C19orf12     | 0.64  | 8.71E-12 | 0.60  | 0.67  | -0.07 | 0.4754 |
| ILMN_1669881 | TSPAN13      | 1.31  | 4.30E-12 | 1.24  | 1.39  | -0.15 | 0.4758 |
| ILMN_1657612 | LOC285900    | -0.61 | 1.17E-11 | -0.58 | -0.65 | 0.07  | 0.4762 |
| ILMN_2326509 | CASP1        | 1.25  | 4.17E-16 | 1.19  | 1.31  | -0.11 | 0.4772 |
| ILMN_1802096 | ABTB1        | -0.74 | 7.14E-10 | -0.69 | -0.79 | 0.10  | 0.4778 |
| ILMN_1759075 | TNFRSF13B    | 1.46  | 3.32E-12 | 1.41  | 1.51  | -0.10 | 0.4781 |
| ILMN_1674402 | TMEM71       | -0.61 | 1.73E-04 | -0.55 | -0.68 | 0.13  | 0.4792 |
| ILMN_1683664 | LOC650369    | 1.12  | 1.90E-19 | 1.08  | 1.16  | -0.08 | 0.4802 |
| ILMN_1776777 | ADAR         | 1.21  | 8.16E-23 | 1.17  | 1.25  | -0.08 | 0.4805 |
| ILMN_3245559 | CDK2AP1      | -0.60 | 2.04E-07 | -0.56 | -0.63 | 0.07  | 0.4809 |
| ILMN_3289508 | LOC339192    | -0.66 | 1.10E-06 | -0.61 | -0.71 | 0.11  | 0.4819 |
| ILMN_1697694 | ATP6AP1      | -0.92 | 5.13E-11 | -0.96 | -0.89 | -0.07 | 0.4833 |
| ILMN_1687495 | SLC37A1      | 0.78  | 4.71E-17 | 0.75  | 0.81  | -0.06 | 0.4836 |
| ILMN_3225471 | LOC728650    | -0.91 | 2.03E-10 | -0.85 | -0.97 | 0.13  | 0.4846 |
| ILMN_2193213 | DEFA1        | -1.20 | 4.36E-02 | -1.27 | -1.13 | -0.14 | 0.4852 |
| ILMN_1764850 | HPCAL1       | -0.59 | 2.60E-11 | -0.56 | -0.63 | 0.07  | 0.4852 |
| ILMN_1738712 | GPR180       | 0.77  | 1.43E-17 | 0.74  | 0.80  | -0.06 | 0.4856 |
| ILMN_2316236 | HOPX         | -0.68 | 4.11E-03 | -0.74 | -0.62 | -0.12 | 0.4856 |
| ILMN_1791576 | CHSY1        | 0.63  | 1.03E-09 | 0.59  | 0.68  | -0.09 | 0.4863 |
| ILMN_1759250 | TAP2         | 1.55  | 3.38E-13 | 1.47  | 1.63  | -0.16 | 0.4865 |
| ILMN_1797522 | DUSP3        | -1.43 | 1.25E-15 | -1.48 | -1.39 | -0.09 | 0.4916 |
| ILMN_2399392 | SIL1         | -0.61 | 9.71E-09 | -0.66 | -0.57 | -0.08 | 0.4924 |
| ILMN_1804117 | FAM89B       | -0.89 | 4.34E-14 | -0.93 | -0.85 | -0.08 | 0.4938 |
| ILMN_1658289 | WDR54        | -0.78 | 1.03E-11 | -0.74 | -0.82 | 0.07  | 0.4950 |
| ILMN_2379599 | CD163        | -1.51 | 2.21E-04 | -1.70 | -1.33 | -0.37 | 0.4959 |
| ILMN_1706502 | EIF2AK2      | 2.97  | 2.69E-21 | 2.88  | 3.05  | -0.16 | 0.4967 |
| ILMN_1698533 | IDH3A        | 0.89  | 1.88E-14 | 0.93  | 0.84  | 0.09  | 0.4973 |
| ILMN_1662799 | GPSM3        | -0.59 | 7.27E-06 | -0.54 | -0.64 | 0.10  | 0.4985 |
| ILMN_2399363 | CLEC4A       | -2.55 | 1.06E-13 | -2.63 | -2.46 | -0.17 | 0.5002 |
| ILMN_1791211 | DOK2         | -1.45 | 1.02E-17 | -1.39 | -1.50 | 0.11  | 0.5013 |
| ILMN_3210741 | LOC642956    | -0.76 | 7.26E-05 | -0.85 | -0.67 | -0.18 | 0.5020 |
| ILMN_1794594 | RASGRP2      | -1.06 | 7.07E-07 | -1.00 | -1.12 | 0.12  | 0.5024 |
| ILMN_1750051 | FLJ39827     | 0.78  | 3.61E-19 | 0.75  | 0.81  | -0.06 | 0.5026 |
| ILMN_1694711 | MAD2L1BP     | 0.63  | 4.73E-10 | 0.60  | 0.66  | -0.06 | 0.5028 |
| ILMN_2397954 | PARP3        | 1.24  | 2.33E-14 | 1.19  | 1.29  | -0.10 | 0.5035 |
| ILMN_1661266 | HLA-DQB1     | -1.00 | 3.09E-03 | -1.08 | -0.92 | -0.16 | 0.5036 |
| ILMN_1801043 | GSN          | -2.11 | 1.74E-13 | -2.18 | -2.03 | -0.16 | 0.5051 |
| ILMN_3290136 | LOC643733    | 1.54  | 6.16E-19 | 1.50  | 1.58  | -0.08 | 0.5066 |
| ILMN_3245413 | DENND5A      | 0.67  | 1.59E-08 | 0.70  | 0.64  | 0.06  | 0.5067 |
| ILMN_1672878 | ABR          | -0.95 | 2.23E-10 | -1.00 | -0.91 | -0.09 | 0.5082 |
| ILMN_1795918 | CENTG3       | -1.05 | 1.65E-12 | -1.10 | -1.00 | -0.10 | 0.5091 |
| ILMN_1738523 | MYD88        | 1.01  | 3.14E-16 | 1.05  | 0.98  | 0.06  | 0.5093 |
| ILMN_1737314 | BCL6         | 0.78  | 1.44E-10 | 0.83  | 0.73  | 0.10  | 0.5094 |
| ILMN_2278636 | CUTL1        | -0.63 | 1.15E-12 | -0.60 | -0.66 | 0.05  | 0.5111 |
| ILMN_1784040 | NAPSA        | 0.68  | 4.37E-09 | 0.64  | 0.72  | -0.08 | 0.5116 |
| ILMN_1664294 | LEPRE1       | -0.66 | 2.66E-13 | -0.62 | -0.70 | 0.08  | 0.5130 |
| ILMN_1711792 | GPBP1        | 1.36  | 2.95E-23 | 1.39  | 1.33  | 0.06  | 0.5132 |
| ILMN_2128750 | PTTG1IP      | -0.74 | 9.80E-12 | -0.77 | -0.70 | -0.07 | 0.5133 |
| ILMN_1718063 | LIPA         | -1.73 | 4.62E-13 | -1.65 | -1.80 | 0.15  | 0.5134 |
| ILMN_2199389 | VIPR1        | -1.03 | 1.74E-07 | -0.99 | -1.08 | 0.10  | 0.5147 |
| ILMN_1766200 | CALHM2       | -0.65 | 3.18E-14 | -0.61 | -0.69 | 0.07  | 0.5152 |
| ILMN_1658628 | C14orf72     | 0.65  | 3.73E-07 | 0.69  | 0.61  | 0.08  | 0.5155 |
| ILMN_1735594 | CDC42SE2     | 0.98  | 1.76E-12 | 1.02  | 0.94  | 0.08  | 0.5178 |
| ILMN_2400030 | PTPN2        | 0.87  | 2.98E-14 | 0.83  | 0.90  | -0.07 | 0.5186 |
| ILMN_2245305 | ABHD12       | -0.84 | 1.06E-11 | -0.89 | -0.79 | -0.10 | 0.5200 |
| ILMN_1663080 | LFNG         | -0.94 | 2.00E-13 | -0.90 | -0.98 | 0.08  | 0.5200 |
| ILMN_2087656 | SLCO2B1      | -2.08 | 1.19E-14 | -2.00 | -2.16 | 0.16  | 0.5211 |
| ILMN_1670542 | AK2          | 0.83  | 1.49E-14 | 0.79  | 0.86  | -0.07 | 0.5216 |
| ILMN_1659017 | C11orf74     | -0.61 | 1.74E-15 | -0.59 | -0.64 | 0.05  | 0.5236 |
| ILMN_1675939 | IFNGR1       | -1.05 | 2.63E-09 | -1.00 | -1.09 | 0.09  | 0.5241 |
| ILMN_1705247 | ACSL5        | 0.67  | 1.70E-08 | 0.72  | 0.62  | 0.10  | 0.5252 |
| ILMN_1695530 | MS4A3        | -0.65 | 8.50E-03 | -0.60 | -0.71 | 0.11  | 0.5254 |
| ILMN_1666078 | HLA-H        | 0.75  | 1.33E-02 | 0.71  | 0.79  | -0.08 | 0.5259 |
| ILMN_3195253 | LOC100130892 | -0.74 | 5.49E-08 | -0.70 | -0.77 | 0.08  | 0.5263 |
| ILMN_1655422 | RPL17        | -0.79 | 5.75E-09 | -0.75 | -0.82 | 0.07  | 0.5263 |
| ILMN_1700671 | ETV7         | 0.79  | 1.99E-15 | 0.75  | 0.82  | -0.08 | 0.5267 |

|              |              |       |          |       |       |       |        |
|--------------|--------------|-------|----------|-------|-------|-------|--------|
| ILMN_2129877 | PARP11       | 1.20  | 1.11E-20 | 1.23  | 1.17  | 0.07  | 0.5274 |
| ILMN_1664016 | ARHGEF18     | -0.78 | 7.91E-10 | -0.73 | -0.82 | 0.09  | 0.5294 |
| ILMN_1676899 | YEATS2       | 1.31  | 5.24E-23 | 1.33  | 1.28  | 0.05  | 0.5303 |
| ILMN_1728107 | GNG7         | -0.59 | 1.65E-08 | -0.55 | -0.63 | 0.08  | 0.5316 |
| ILMN_1716704 | NLRC5        | 0.95  | 4.48E-15 | 0.91  | 0.99  | -0.08 | 0.5317 |
| ILMN_2405324 | IL28RA       | 0.68  | 6.92E-08 | 0.66  | 0.71  | -0.05 | 0.5321 |
| ILMN_1719433 | CD1D         | -1.21 | 1.36E-16 | -1.16 | -1.26 | 0.10  | 0.5322 |
| ILMN_2410826 | OAS1         | 3.35  | 4.42E-25 | 3.28  | 3.42  | -0.14 | 0.5332 |
| ILMN_1753312 | PLXDC2       | -1.58 | 3.88E-15 | -1.62 | -1.55 | -0.07 | 0.5358 |
| ILMN_1797428 | FCRL3        | 0.59  | 2.21E-06 | 0.55  | 0.62  | -0.07 | 0.5361 |
| ILMN_2153373 | LRBA         | 0.60  | 1.95E-10 | 0.57  | 0.63  | -0.06 | 0.5372 |
| ILMN_1724139 | TMEM123      | 0.96  | 8.38E-16 | 0.99  | 0.93  | 0.06  | 0.5372 |
| ILMN_1666976 | PLD3         | -2.52 | 8.73E-24 | -2.47 | -2.57 | 0.10  | 0.5405 |
| ILMN_3213925 | LOC441481    | -1.58 | 1.50E-16 | -1.62 | -1.53 | -0.08 | 0.5434 |
| ILMN_1794510 | FLJ32255     | 0.92  | 8.05E-16 | 0.95  | 0.90  | 0.05  | 0.5448 |
| ILMN_1710326 | CLDND1       | 0.94  | 4.21E-14 | 0.97  | 0.92  | 0.05  | 0.5450 |
| ILMN_1724040 | ANKRD57      | -1.19 | 2.69E-10 | -1.24 | -1.14 | -0.10 | 0.5452 |
| ILMN_1768551 | LOC197135    | 0.63  | 1.40E-04 | 0.67  | 0.59  | 0.08  | 0.5452 |
| ILMN_1732981 | ZBTB32       | 0.91  | 3.10E-12 | 0.86  | 0.95  | -0.09 | 0.5457 |
| ILMN_1784737 | S1PR4        | -0.62 | 3.06E-04 | -0.56 | -0.68 | 0.12  | 0.5460 |
| ILMN_1794914 | UBTD1        | -0.65 | 5.66E-08 | -0.69 | -0.60 | -0.09 | 0.5478 |
| ILMN_1687201 | APOL6        | 1.02  | 1.17E-19 | 0.99  | 1.05  | -0.06 | 0.5484 |
| ILMN_1747347 | C17orf60     | -0.88 | 5.94E-06 | -0.84 | -0.92 | 0.08  | 0.5490 |
| ILMN_1715863 | MLKL         | 0.98  | 5.78E-18 | 0.95  | 1.01  | -0.06 | 0.5499 |
| ILMN_1750400 | C19orf66     | 2.14  | 2.84E-20 | 2.10  | 2.18  | -0.08 | 0.5512 |
| ILMN_1815115 | CYC1         | -0.64 | 2.41E-07 | -0.60 | -0.69 | 0.09  | 0.5513 |
| ILMN_2262044 | PARP10       | 2.01  | 1.89E-19 | 1.96  | 2.07  | -0.11 | 0.5516 |
| ILMN_1773006 | FABP4        | -4.29 | 1.97E-18 | -4.15 | -4.43 | 0.28  | 0.5526 |
| ILMN_2055634 | TIAF1        | -0.87 | 7.10E-17 | -0.83 | -0.90 | 0.07  | 0.5533 |
| ILMN_1754507 | IRF4         | 0.71  | 5.03E-10 | 0.68  | 0.75  | -0.07 | 0.5550 |
| ILMN_1725981 | LOC654189    | 0.61  | 8.25E-16 | 0.63  | 0.58  | 0.05  | 0.5560 |
| ILMN_1690907 | CCR6         | 0.65  | 5.37E-07 | 0.67  | 0.63  | 0.05  | 0.5594 |
| ILMN_3244014 | LOC100131967 | -0.73 | 1.61E-09 | -0.68 | -0.78 | 0.10  | 0.5610 |
| ILMN_1761199 | SLCO2B1      | -1.24 | 2.01E-13 | -1.19 | -1.30 | 0.11  | 0.5629 |
| ILMN_2095660 | TMEM156      | 0.68  | 4.23E-06 | 0.72  | 0.65  | 0.07  | 0.5636 |
| ILMN_2353358 | LGALS8       | 0.71  | 5.21E-08 | 0.67  | 0.74  | -0.06 | 0.5640 |
| ILMN_1727332 | ATPIF1       | -0.65 | 2.72E-08 | -0.61 | -0.70 | 0.09  | 0.5641 |
| ILMN_2292178 | CLEC12A      | -0.93 | 3.31E-04 | -1.00 | -0.86 | -0.14 | 0.5650 |
| ILMN_1789502 | GPC4         | -0.78 | 5.68E-04 | -0.87 | -0.69 | -0.18 | 0.5652 |
| ILMN_3239610 | LOC100133565 | -0.95 | 9.14E-15 | -0.98 | -0.92 | -0.06 | 0.5655 |
| ILMN_1760374 | CD8A         | 0.81  | 1.02E-06 | 0.77  | 0.85  | -0.08 | 0.5663 |
| ILMN_3242603 | GTF2H2B      | 0.59  | 1.06E-09 | 0.56  | 0.61  | -0.05 | 0.5674 |
| ILMN_2192779 | GPR15        | 0.63  | 2.36E-06 | 0.68  | 0.58  | 0.10  | 0.5676 |
| ILMN_1660017 | PRR5         | 0.87  | 8.23E-15 | 0.84  | 0.90  | -0.06 | 0.5689 |
| ILMN_3241657 | TMEM204      | -0.90 | 6.22E-06 | -0.86 | -0.94 | 0.08  | 0.5691 |
| ILMN_1707475 | UBE2E2       | -0.99 | 3.79E-10 | -1.03 | -0.95 | -0.08 | 0.5693 |
| ILMN_1679476 | GART         | 0.75  | 7.18E-15 | 0.77  | 0.72  | 0.05  | 0.5697 |
| ILMN_1721978 | CARD11       | 0.99  | 4.78E-11 | 1.02  | 0.96  | 0.06  | 0.5703 |
| ILMN_2325338 | APOL2        | 0.65  | 2.16E-11 | 0.62  | 0.67  | -0.05 | 0.5709 |
| ILMN_1713892 | C4orf34      | -0.62 | 7.20E-12 | -0.59 | -0.65 | 0.06  | 0.5712 |
| ILMN_1753342 | SAT1         | 0.86  | 3.07E-14 | 0.83  | 0.89  | -0.06 | 0.5737 |
| ILMN_1801205 | GNPMB        | -2.34 | 5.82E-10 | -2.23 | -2.45 | 0.22  | 0.5737 |
| ILMN_1768194 | BIRC2        | 0.74  | 9.15E-14 | 0.77  | 0.71  | 0.06  | 0.5756 |
| ILMN_1809957 | AP2S1        | -0.98 | 2.07E-17 | -0.95 | -1.01 | 0.06  | 0.5757 |
| ILMN_1748538 | ALDH1A2      | -0.76 | 9.96E-03 | -0.84 | -0.67 | -0.17 | 0.5764 |
| ILMN_1690920 | SP100        | 0.92  | 2.82E-18 | 0.94  | 0.89  | 0.05  | 0.5770 |
| ILMN_1760247 | CD70         | 0.73  | 1.62E-13 | 0.70  | 0.75  | -0.05 | 0.5771 |
| ILMN_2190084 | VAMP8        | -0.90 | 3.06E-14 | -0.86 | -0.93 | 0.08  | 0.5779 |
| ILMN_1682929 | SYTL2        | 0.78  | 1.86E-09 | 0.75  | 0.81  | -0.06 | 0.5807 |
| ILMN_2318685 | ABHD12       | -0.60 | 3.78E-09 | -0.57 | -0.64 | 0.07  | 0.5808 |
| ILMN_2352190 | CLIP2        | -0.62 | 8.34E-15 | -0.59 | -0.64 | 0.05  | 0.5811 |
| ILMN_2384122 | GPR56        | -1.04 | 1.57E-03 | -0.98 | -1.11 | 0.13  | 0.5820 |
| ILMN_3236036 | LOC283663    | -0.69 | 7.24E-15 | -0.67 | -0.72 | 0.05  | 0.5821 |
| ILMN_2409754 | PRR5         | 1.63  | 1.46E-19 | 1.59  | 1.67  | -0.08 | 0.5821 |
| ILMN_1793959 | ADPGK        | 0.86  | 2.44E-17 | 0.83  | 0.88  | -0.06 | 0.5821 |
| ILMN_1744604 | CYBA         | -0.72 | 1.88E-08 | -0.75 | -0.68 | -0.07 | 0.5824 |
| ILMN_2326512 | CASP1        | 1.34  | 2.00E-16 | 1.29  | 1.39  | -0.10 | 0.5830 |
| ILMN_2260991 | TSPO         | -1.03 | 2.93E-09 | -0.99 | -1.07 | 0.08  | 0.5839 |
| ILMN_1760778 | ENG          | -2.36 | 3.64E-19 | -2.42 | -2.30 | -0.12 | 0.5843 |
| ILMN_2411282 | QSOX1        | -0.69 | 3.51E-06 | -0.72 | -0.65 | -0.07 | 0.5853 |
| ILMN_1665428 | GSDMD        | 0.79  | 8.06E-10 | 0.84  | 0.75  | 0.09  | 0.5855 |
| ILMN_1662358 | MX1          | 2.85  | 4.83E-21 | 2.78  | 2.92  | -0.15 | 0.5855 |
| ILMN_1658327 | BAZ1A        | 0.59  | 1.13E-07 | 0.55  | 0.62  | -0.07 | 0.5860 |
| ILMN_1786444 | LPL          | -1.26 | 7.59E-06 | -1.36 | -1.16 | -0.20 | 0.5888 |

|              |              |       |          |       |       |       |        |
|--------------|--------------|-------|----------|-------|-------|-------|--------|
| ILMN_1775901 | PHF5A        | 0.63  | 6.32E-19 | 0.65  | 0.61  | 0.05  | 0.5901 |
| ILMN_1684943 | TRAT1        | 1.04  | 1.37E-11 | 1.08  | 1.01  | 0.07  | 0.5907 |
| ILMN_1681016 | SPNS1        | -0.66 | 1.64E-09 | -0.69 | -0.63 | -0.06 | 0.5910 |
| ILMN_1673738 | LOC646483    | -0.74 | 2.45E-11 | -0.70 | -0.78 | 0.08  | 0.5911 |
| ILMN_1741491 | ZNHIT1       | -0.61 | 8.36E-14 | -0.59 | -0.64 | 0.05  | 0.5919 |
| ILMN_1708340 | DAPK1        | -0.68 | 4.23E-06 | -0.72 | -0.63 | -0.10 | 0.5922 |
| ILMN_1659437 | TXNDC17      | -0.64 | 6.35E-13 | -0.67 | -0.61 | -0.06 | 0.5931 |
| ILMN_1695829 | TTYH2        | -0.72 | 2.00E-11 | -0.68 | -0.75 | 0.07  | 0.5937 |
| ILMN_1683678 | SPATS2L      | 2.76  | 3.28E-30 | 2.80  | 2.73  | 0.07  | 0.5939 |
| ILMN_1799614 | PNPLA6       | -0.78 | 3.15E-08 | -0.82 | -0.74 | -0.08 | 0.5942 |
| ILMN_2255133 | BCL11A       | 0.86  | 1.75E-07 | 0.84  | 0.88  | -0.04 | 0.5952 |
| ILMN_1742521 | GRB2         | -0.65 | 1.09E-08 | -0.60 | -0.69 | 0.08  | 0.5955 |
| ILMN_1749432 | MRPL32       | 0.79  | 2.97E-14 | 0.82  | 0.76  | 0.06  | 0.5966 |
| ILMN_1718734 | MLLT6        | 1.05  | 1.35E-15 | 1.03  | 1.08  | -0.05 | 0.5974 |
| ILMN_1750800 | ACO1         | -1.10 | 1.26E-20 | -1.07 | -1.12 | 0.05  | 0.6003 |
| ILMN_1743205 | ABCA7        | -0.82 | 2.72E-09 | -0.79 | -0.85 | 0.06  | 0.6010 |
| ILMN_1699695 | TNFRSF21     | -0.70 | 1.16E-04 | -0.63 | -0.76 | 0.13  | 0.6013 |
| ILMN_1687375 | ATP2A2       | -0.72 | 1.58E-13 | -0.69 | -0.75 | 0.06  | 0.6022 |
| ILMN_1809437 | RHBDD2       | -0.86 | 3.55E-06 | -0.92 | -0.81 | -0.12 | 0.6042 |
| ILMN_1678729 | SIL1         | -0.64 | 1.43E-05 | -0.67 | -0.61 | -0.07 | 0.6055 |
| ILMN_2355463 | CYFIP1       | -0.81 | 2.24E-13 | -0.84 | -0.78 | -0.06 | 0.6075 |
| ILMN_2356654 | LGALS8       | 0.91  | 2.18E-12 | 0.88  | 0.94  | -0.06 | 0.6083 |
| ILMN_2352097 | GPR56        | -0.96 | 2.77E-03 | -0.90 | -1.02 | 0.12  | 0.6088 |
| ILMN_2320964 | ADAR         | 1.61  | 4.12E-25 | 1.58  | 1.64  | -0.06 | 0.6094 |
| ILMN_1769782 | LAX1         | 0.82  | 2.14E-06 | 0.84  | 0.80  | 0.04  | 0.6119 |
| ILMN_3245869 | LOC440957    | -0.61 | 8.39E-13 | -0.59 | -0.64 | 0.05  | 0.6174 |
| ILMN_2336595 | ACSS2        | -1.09 | 3.94E-12 | -1.06 | -1.12 | 0.07  | 0.6191 |
| ILMN_2350801 | SLC25A29     | -0.63 | 1.96E-12 | -0.60 | -0.65 | 0.05  | 0.6199 |
| ILMN_1746883 | SAT2         | -0.65 | 1.04E-10 | -0.68 | -0.61 | -0.06 | 0.6199 |
| ILMN_1798454 | MAD2L1BP     | 0.78  | 2.21E-16 | 0.76  | 0.80  | -0.04 | 0.6216 |
| ILMN_1708991 | CCNY         | -0.60 | 1.23E-10 | -0.56 | -0.63 | 0.07  | 0.6218 |
| ILMN_1798980 | CAPZB        | -0.91 | 9.30E-17 | -0.88 | -0.94 | 0.06  | 0.6218 |
| ILMN_3243928 | DDX60L       | 2.29  | 4.01E-27 | 2.26  | 2.32  | -0.06 | 0.6241 |
| ILMN_1808148 | SMCHD1       | 0.90  | 9.57E-15 | 0.93  | 0.88  | 0.05  | 0.6272 |
| ILMN_2352009 | ACADVL       | -0.84 | 3.87E-11 | -0.81 | -0.88 | 0.07  | 0.6281 |
| ILMN_1795181 | DDX60        | 2.76  | 1.72E-23 | 2.71  | 2.81  | -0.09 | 0.6292 |
| ILMN_1684982 | PDK4         | -2.45 | 1.00E-17 | -2.39 | -2.52 | 0.13  | 0.6293 |
| ILMN_1810729 | UBL3         | -0.64 | 3.08E-14 | -0.61 | -0.66 | 0.04  | 0.6304 |
| ILMN_1783276 | NEXN         | 2.46  | 2.26E-29 | 2.43  | 2.49  | -0.06 | 0.6307 |
| ILMN_1682312 | CYBB         | -3.18 | 2.88E-20 | -3.23 | -3.13 | -0.10 | 0.6320 |
| ILMN_1731714 | CREB5        | -0.73 | 1.28E-14 | -0.70 | -0.75 | 0.05  | 0.6322 |
| ILMN_2146761 | FABP5        | -0.81 | 4.51E-05 | -0.88 | -0.74 | -0.14 | 0.6325 |
| ILMN_1681283 | HIF1A        | 0.73  | 1.20E-08 | 0.70  | 0.76  | -0.06 | 0.6353 |
| ILMN_1703316 | LOC255783    | 1.23  | 4.91E-14 | 1.19  | 1.27  | -0.08 | 0.6358 |
| ILMN_1748767 | LOC730740    | -0.86 | 3.97E-11 | -0.83 | -0.89 | 0.06  | 0.6361 |
| ILMN_1698725 | FRMD3        | 0.85  | 1.80E-10 | 0.89  | 0.81  | 0.07  | 0.6364 |
| ILMN_3307791 | FAM69A       | 0.87  | 1.13E-11 | 0.84  | 0.90  | -0.07 | 0.6375 |
| ILMN_2136133 | PABPC1       | -0.79 | 2.10E-04 | -0.85 | -0.73 | -0.12 | 0.6402 |
| ILMN_1721128 | TOMM34       | 0.78  | 9.93E-10 | 0.80  | 0.75  | 0.05  | 0.6409 |
| ILMN_1705302 | FCGRT        | -3.39 | 1.71E-21 | -3.43 | -3.34 | -0.09 | 0.6410 |
| ILMN_1692664 | PRR5         | 2.02  | 8.16E-20 | 1.98  | 2.06  | -0.08 | 0.6426 |
| ILMN_1718936 | LST1         | -1.83 | 3.99E-12 | -1.87 | -1.79 | -0.08 | 0.6434 |
| ILMN_1786823 | ICAM2        | 0.70  | 1.76E-07 | 0.68  | 0.73  | -0.05 | 0.6452 |
| ILMN_1721411 | PARP10       | 1.81  | 1.67E-15 | 1.85  | 1.76  | 0.09  | 0.6485 |
| ILMN_3211906 | LOC647030    | -0.71 | 5.07E-05 | -0.75 | -0.68 | -0.07 | 0.6491 |
| ILMN_1804174 | FCGR2B       | -0.64 | 1.42E-06 | -0.69 | -0.60 | -0.09 | 0.6492 |
| ILMN_1715698 | MGC71993     | -0.76 | 3.22E-10 | -0.78 | -0.73 | -0.05 | 0.6517 |
| ILMN_2300664 | CACNA1I      | -0.98 | 4.59E-06 | -0.95 | -1.01 | 0.06  | 0.6525 |
| ILMN_1757845 | SPIRE1       | -0.80 | 4.04E-12 | -0.77 | -0.82 | 0.05  | 0.6539 |
| ILMN_2403228 | CLEC12A      | -0.75 | 2.40E-05 | -0.71 | -0.79 | 0.08  | 0.6540 |
| ILMN_1733515 | LOXL3        | -0.74 | 9.54E-15 | -0.71 | -0.76 | 0.04  | 0.6546 |
| ILMN_1651315 | HMG20B       | -0.76 | 8.58E-09 | -0.74 | -0.79 | 0.06  | 0.6557 |
| ILMN_3192316 | LOC100129237 | 1.15  | 5.02E-09 | 1.12  | 1.17  | -0.05 | 0.6561 |
| ILMN_1726928 | TCEA3        | -0.65 | 7.47E-05 | -0.68 | -0.63 | -0.05 | 0.6564 |
| ILMN_1782389 | LAD1         | 1.18  | 1.86E-09 | 1.16  | 1.20  | -0.05 | 0.6570 |
| ILMN_1741131 | CHRN1        | 0.86  | 2.33E-21 | 0.84  | 0.88  | -0.04 | 0.6573 |
| ILMN_1673357 | SLA2         | 0.79  | 8.40E-11 | 0.76  | 0.81  | -0.06 | 0.6587 |
| ILMN_1730433 | CD2AP        | 0.80  | 7.43E-17 | 0.78  | 0.82  | -0.04 | 0.6605 |
| ILMN_1802611 | SPEN         | -0.60 | 4.03E-13 | -0.58 | -0.62 | 0.04  | 0.6629 |
| ILMN_1728224 | OGFR         | 0.74  | 1.84E-10 | 0.71  | 0.77  | -0.06 | 0.6635 |
| ILMN_1690139 | KIAA0748     | 0.64  | 3.71E-04 | 0.66  | 0.61  | 0.05  | 0.6650 |
| ILMN_2233493 | GPBP1        | 0.69  | 3.80E-09 | 0.71  | 0.67  | 0.04  | 0.6651 |
| ILMN_1714401 | SNX27        | -0.88 | 2.42E-13 | -0.86 | -0.91 | 0.05  | 0.6653 |
| ILMN_1704985 | CYP27A1      | -3.00 | 3.62E-10 | -2.92 | -3.07 | 0.15  | 0.6683 |

|              |              |       |          |       |       |       |        |
|--------------|--------------|-------|----------|-------|-------|-------|--------|
| ILMN_1668039 | GYPC         | -0.65 | 3.23E-03 | -0.69 | -0.61 | -0.07 | 0.6693 |
| ILMN_3239460 | OAZ2         | -0.99 | 6.28E-12 | -0.95 | -1.02 | 0.08  | 0.6700 |
| ILMN_1741942 | STX16        | 0.67  | 1.15E-07 | 0.70  | 0.65  | 0.05  | 0.6710 |
| ILMN_2182482 | SHCBP1       | -0.73 | 7.38E-07 | -0.68 | -0.78 | 0.10  | 0.6710 |
| ILMN_3269719 | ARAP1        | -0.62 | 1.11E-10 | -0.65 | -0.60 | -0.05 | 0.6714 |
| ILMN_2105966 | SLC35A4      | 0.63  | 1.46E-09 | 0.65  | 0.60  | 0.05  | 0.6737 |
| ILMN_2091347 | IDH1         | -0.68 | 3.47E-12 | -0.66 | -0.70 | 0.04  | 0.6743 |
| ILMN_1798705 | CCNC         | 0.63  | 3.82E-14 | 0.65  | 0.61  | 0.04  | 0.6763 |
| ILMN_3250023 | CLEC2D       | 1.06  | 6.98E-18 | 1.04  | 1.08  | -0.04 | 0.6785 |
| ILMN_2201580 | GSTM2        | -0.78 | 4.22E-02 | -0.76 | -0.80 | 0.05  | 0.6792 |
| ILMN_1704305 | NIP7         | 0.65  | 5.02E-13 | 0.66  | 0.63  | 0.03  | 0.6796 |
| ILMN_2284706 | PHF11        | 1.17  | 2.62E-22 | 1.15  | 1.19  | -0.04 | 0.6807 |
| ILMN_2078697 | ALPK1        | 0.74  | 8.62E-12 | 0.77  | 0.72  | 0.05  | 0.6834 |
| ILMN_1757347 | C22orf9      | -0.67 | 7.98E-15 | -0.65 | -0.69 | 0.04  | 0.6835 |
| ILMN_1767365 | PAK1         | -1.61 | 3.53E-19 | -1.58 | -1.63 | 0.05  | 0.6845 |
| ILMN_1666553 | SLC25A19     | -0.75 | 2.78E-07 | -0.72 | -0.78 | 0.06  | 0.6853 |
| ILMN_1723433 | LOC653820    | -0.62 | 8.57E-06 | -0.66 | -0.59 | -0.07 | 0.6863 |
| ILMN_1669286 | YWHAZ        | 0.62  | 1.97E-15 | 0.60  | 0.64  | -0.04 | 0.6898 |
| ILMN_1726769 | CNDP2        | 0.80  | 6.15E-12 | 0.78  | 0.83  | -0.05 | 0.6906 |
| ILMN_2361603 | NDRG2        | -0.64 | 4.30E-05 | -0.59 | -0.69 | 0.10  | 0.6916 |
| ILMN_1789196 | TPM2         | -0.74 | 8.31E-04 | -0.71 | -0.76 | 0.05  | 0.6917 |
| ILMN_1797875 | ALOX5AP      | 0.59  | 2.96E-08 | 0.61  | 0.56  | 0.05  | 0.6918 |
| ILMN_1811702 | GRN          | -1.18 | 4.98E-07 | -1.22 | -1.14 | -0.09 | 0.6928 |
| ILMN_1715715 | CEBPA        | -2.85 | 1.74E-28 | -2.87 | -2.83 | -0.04 | 0.6932 |
| ILMN_1681679 | TSPO         | -1.07 | 9.43E-12 | -1.05 | -1.09 | 0.05  | 0.6933 |
| ILMN_1660923 | HCG4         | 0.59  | 1.22E-05 | 0.61  | 0.57  | 0.04  | 0.6934 |
| ILMN_1753862 | SRP54        | 0.61  | 1.50E-13 | 0.59  | 0.62  | -0.04 | 0.6937 |
| ILMN_1700690 | VAT1         | -0.98 | 4.80E-13 | -1.01 | -0.95 | -0.05 | 0.6944 |
| ILMN_1691097 | HSP90AA1     | 0.75  | 2.97E-14 | 0.73  | 0.77  | -0.04 | 0.6987 |
| ILMN_2378952 | GPX4         | -1.04 | 8.93E-13 | -1.05 | -1.02 | -0.04 | 0.6989 |
| ILMN_1792323 | HDC          | 1.01  | 9.33E-06 | 0.97  | 1.05  | -0.08 | 0.6992 |
| ILMN_1684391 | PLOD1        | -1.88 | 3.00E-16 | -1.90 | -1.85 | -0.05 | 0.6994 |
| ILMN_2220739 | TMCO3        | -0.72 | 3.67E-10 | -0.70 | -0.73 | 0.03  | 0.7003 |
| ILMN_1780671 | PLEKHG3      | -1.31 | 7.01E-17 | -1.28 | -1.34 | 0.06  | 0.7005 |
| ILMN_1737163 | SH3BGRL3     | -1.35 | 2.32E-16 | -1.33 | -1.38 | 0.05  | 0.7010 |
| ILMN_3241218 | ANKIB1       | 0.61  | 1.47E-12 | 0.59  | 0.63  | -0.03 | 0.7012 |
| ILMN_1773849 | ATP6V0C      | -0.84 | 7.69E-09 | -0.87 | -0.81 | -0.06 | 0.7012 |
| ILMN_1761945 | FGFBP2       | -1.95 | 6.12E-09 | -1.91 | -1.99 | 0.08  | 0.7015 |
| ILMN_1726460 | RPL14        | -0.67 | 2.48E-05 | -0.70 | -0.65 | -0.05 | 0.7041 |
| ILMN_2231928 | MX2          | 3.04  | 2.75E-26 | 3.01  | 3.08  | -0.07 | 0.7043 |
| ILMN_2227133 | KIAA0082     | 0.76  | 4.86E-26 | 0.77  | 0.75  | 0.02  | 0.7065 |
| ILMN_1689371 | GIMAP2       | 0.61  | 7.55E-06 | 0.58  | 0.63  | -0.05 | 0.7093 |
| ILMN_1730620 | ARRB1        | -0.69 | 3.18E-09 | -0.71 | -0.66 | -0.04 | 0.7095 |
| ILMN_1729294 | RNF130       | -1.82 | 2.76E-15 | -1.85 | -1.80 | -0.06 | 0.7096 |
| ILMN_1769290 | TTC39B       | 1.60  | 2.67E-16 | 1.62  | 1.58  | 0.05  | 0.7098 |
| ILMN_2388466 | TIA1         | 1.07  | 1.82E-18 | 1.05  | 1.09  | -0.03 | 0.7107 |
| ILMN_2326273 | CHI3L2       | 1.33  | 3.69E-18 | 1.35  | 1.31  | 0.04  | 0.7108 |
| ILMN_1678238 | ZNF683       | -0.71 | 4.40E-02 | -0.68 | -0.74 | 0.06  | 0.7136 |
| ILMN_1793743 | DIRC2        | -1.36 | 3.23E-16 | -1.39 | -1.33 | -0.05 | 0.7147 |
| ILMN_1740170 | CHCHD10      | -0.95 | 6.44E-10 | -0.92 | -0.98 | 0.06  | 0.7148 |
| ILMN_1703327 | PSTPIP1      | -0.89 | 1.81E-11 | -0.87 | -0.92 | 0.05  | 0.7151 |
| ILMN_1756696 | USF2         | -0.60 | 1.41E-08 | -0.62 | -0.57 | -0.05 | 0.7152 |
| ILMN_1684306 | S100A4       | -2.91 | 6.63E-24 | -2.88 | -2.95 | 0.08  | 0.7159 |
| ILMN_1696622 | SLC38A6      | -0.68 | 2.67E-09 | -0.71 | -0.66 | -0.05 | 0.7162 |
| ILMN_1703305 | TWF2         | -0.65 | 4.93E-12 | -0.63 | -0.67 | 0.04  | 0.7171 |
| ILMN_2390586 | SP100        | 1.28  | 8.03E-24 | 1.26  | 1.29  | -0.03 | 0.7171 |
| ILMN_1685480 | TARS         | 0.76  | 5.15E-10 | 0.74  | 0.77  | -0.04 | 0.7177 |
| ILMN_3214389 | LOC100133583 | -1.20 | 1.06E-05 | -1.24 | -1.15 | -0.09 | 0.7195 |
| ILMN_2373831 | BTN3A3       | 0.80  | 3.89E-10 | 0.78  | 0.82  | -0.03 | 0.7197 |
| ILMN_1676719 | LOC644330    | 0.75  | 5.60E-10 | 0.73  | 0.78  | -0.05 | 0.7228 |
| ILMN_2112301 | DRAP1        | 0.95  | 1.45E-09 | 0.92  | 0.98  | -0.06 | 0.7239 |
| ILMN_2312275 | SRP54        | 0.59  | 2.74E-11 | 0.57  | 0.61  | -0.04 | 0.7243 |
| ILMN_2216582 | LYL1         | -1.10 | 1.33E-09 | -1.07 | -1.12 | 0.06  | 0.7244 |
| ILMN_1810147 | ZNF524       | -0.63 | 2.96E-05 | -0.60 | -0.66 | 0.06  | 0.7247 |
| ILMN_1763147 | NDUFB6       | -0.70 | 3.24E-12 | -0.72 | -0.68 | -0.04 | 0.7253 |
| ILMN_1748915 | S100A12      | -0.61 | 3.98E-02 | -0.64 | -0.57 | -0.07 | 0.7256 |
| ILMN_1710427 | VPS37B       | 0.79  | 1.09E-09 | 0.82  | 0.77  | 0.06  | 0.7280 |
| ILMN_1801254 | LOC648984    | -0.62 | 1.80E-06 | -0.59 | -0.64 | 0.06  | 0.7288 |
| ILMN_1676336 | AADA1        | -1.32 | 2.57E-13 | -1.34 | -1.29 | -0.05 | 0.7288 |
| ILMN_1779401 | CHP          | -0.77 | 1.06E-07 | -0.74 | -0.80 | 0.06  | 0.7303 |
| ILMN_1699887 | ST14         | -0.65 | 4.66E-06 | -0.67 | -0.63 | -0.04 | 0.7309 |
| ILMN_1800634 | NME4         | -0.79 | 9.73E-08 | -0.76 | -0.81 | 0.05  | 0.7324 |
| ILMN_1688780 | S100A4       | -2.83 | 2.18E-23 | -2.79 | -2.86 | 0.07  | 0.7325 |
| ILMN_1739946 | VKORC1       | -0.81 | 4.05E-11 | -0.79 | -0.83 | 0.05  | 0.7330 |

|              |              |       |          |       |       |       |        |
|--------------|--------------|-------|----------|-------|-------|-------|--------|
| ILMN_1722834 | RGS12        | -1.41 | 1.25E-18 | -1.39 | -1.44 | 0.05  | 0.7334 |
| ILMN_1753347 | DEFA4        | -1.00 | 1.14E-04 | -0.94 | -1.05 | 0.11  | 0.7346 |
| ILMN_2222880 | SLC25A42     | -0.66 | 1.93E-10 | -0.64 | -0.68 | 0.04  | 0.7349 |
| ILMN_2116827 | RGPD1        | 0.76  | 2.14E-06 | 0.74  | 0.78  | -0.04 | 0.7350 |
| ILMN_1674640 | CXCR6        | 0.76  | 1.44E-04 | 0.74  | 0.78  | -0.04 | 0.7352 |
| ILMN_1696187 | PYGL         | -1.28 | 5.89E-12 | -1.26 | -1.30 | 0.04  | 0.7376 |
| ILMN_1794470 | ANKFY1       | 0.97  | 4.79E-17 | 0.99  | 0.95  | 0.04  | 0.7379 |
| ILMN_1796146 | EIF4E3       | 0.92  | 1.45E-15 | 0.94  | 0.90  | 0.04  | 0.7382 |
| ILMN_1762972 | CHD9         | -0.69 | 2.02E-11 | -0.67 | -0.71 | 0.04  | 0.7383 |
| ILMN_1691731 | PARP14       | 1.79  | 1.81E-18 | 1.76  | 1.82  | -0.06 | 0.7387 |
| ILMN_3236344 | CTGLF7       | 0.91  | 8.56E-08 | 0.88  | 0.94  | -0.06 | 0.7398 |
| ILMN_1667232 | KIR2DL3      | 0.71  | 1.21E-02 | 0.69  | 0.73  | -0.04 | 0.7418 |
| ILMN_3310491 | MIR1978      | 0.64  | 7.39E-04 | 0.61  | 0.66  | -0.05 | 0.7419 |
| ILMN_1777584 | KARS         | 0.59  | 2.29E-11 | 0.57  | 0.61  | -0.03 | 0.7441 |
| ILMN_2053829 | CBLN3        | 0.88  | 5.58E-12 | 0.90  | 0.86  | 0.04  | 0.7446 |
| ILMN_1801119 | BCL2         | 0.81  | 2.51E-13 | 0.79  | 0.83  | -0.03 | 0.7448 |
| ILMN_2175912 | ITGB2        | -1.63 | 5.08E-20 | -1.61 | -1.65 | 0.04  | 0.7451 |
| ILMN_1739756 | KIR2DL4      | 0.84  | 1.65E-03 | 0.82  | 0.87  | -0.04 | 0.7493 |
| ILMN_1776674 | SAC3D1       | -0.73 | 5.08E-06 | -0.69 | -0.76 | 0.07  | 0.7493 |
| ILMN_1707286 | FLJ22662     | -3.34 | 8.11E-20 | -3.38 | -3.30 | -0.07 | 0.7494 |
| ILMN_3241136 | RNASEK       | -0.71 | 2.33E-10 | -0.73 | -0.69 | -0.03 | 0.7507 |
| ILMN_1703949 | KPNB1        | 0.95  | 1.39E-17 | 0.97  | 0.93  | 0.03  | 0.7508 |
| ILMN_2380771 | AKR1A1       | -0.78 | 1.14E-10 | -0.76 | -0.80 | 0.04  | 0.7514 |
| ILMN_1654735 | SLCO3A1      | -0.81 | 4.35E-13 | -0.82 | -0.79 | -0.03 | 0.7544 |
| ILMN_1765446 | EMP3         | -0.68 | 1.11E-10 | -0.66 | -0.70 | 0.04  | 0.7549 |
| ILMN_1724422 | SELL         | 0.86  | 4.36E-07 | 0.84  | 0.87  | -0.04 | 0.7551 |
| ILMN_1684873 | ARSD         | -0.71 | 1.22E-09 | -0.68 | -0.73 | 0.05  | 0.7553 |
| ILMN_1803036 | TARBP1       | 1.96  | 2.30E-21 | 1.98  | 1.94  | 0.04  | 0.7569 |
| ILMN_1700660 | RNF135       | -0.69 | 3.33E-08 | -0.67 | -0.72 | 0.05  | 0.7575 |
| ILMN_1740015 | CD14         | -2.73 | 1.32E-08 | -2.80 | -2.66 | -0.14 | 0.7576 |
| ILMN_3241091 | LOC100130886 | -0.77 | 6.36E-10 | -0.75 | -0.79 | 0.04  | 0.7578 |
| ILMN_1710844 | PARP10       | 1.83  | 6.09E-15 | 1.80  | 1.86  | -0.06 | 0.7588 |
| ILMN_1658247 | OAS1         | 2.39  | 1.66E-09 | 2.44  | 2.34  | 0.10  | 0.7594 |
| ILMN_1765851 | TRADD        | 0.89  | 7.93E-11 | 0.91  | 0.87  | 0.04  | 0.7596 |
| ILMN_1704554 | LOC648470    | 2.15  | 1.24E-22 | 2.13  | 2.18  | -0.05 | 0.7597 |
| ILMN_2087080 | RPL5         | -0.65 | 3.39E-09 | -0.63 | -0.67 | 0.04  | 0.7598 |
| ILMN_1686367 | HSPA8        | 0.76  | 6.42E-14 | 0.78  | 0.74  | 0.03  | 0.7613 |
| ILMN_1792305 | ZNF318       | -0.85 | 8.85E-17 | -0.86 | -0.83 | -0.03 | 0.7619 |
| ILMN_1712634 | TIA1         | 1.19  | 1.97E-15 | 1.16  | 1.21  | -0.05 | 0.7646 |
| ILMN_2219712 | HMGB2        | -1.09 | 1.91E-12 | -1.11 | -1.07 | -0.04 | 0.7650 |
| ILMN_1739001 | TACSTD2      | -0.64 | 1.00E-03 | -0.68 | -0.60 | -0.08 | 0.7652 |
| ILMN_1662174 | ORMDL3       | 1.03  | 5.83E-15 | 1.02  | 1.05  | -0.04 | 0.7653 |
| ILMN_2242937 | ARSB         | -0.64 | 7.34E-05 | -0.66 | -0.62 | -0.04 | 0.7661 |
| ILMN_3244110 | FAM156B      | -0.67 | 1.93E-12 | -0.65 | -0.68 | 0.03  | 0.7665 |
| ILMN_1723467 | ITGB1        | -0.67 | 2.26E-11 | -0.65 | -0.68 | 0.03  | 0.7694 |
| ILMN_1677404 | RAP2A        | -0.60 | 1.58E-09 | -0.58 | -0.61 | 0.03  | 0.7728 |
| ILMN_3249419 | LOC728457    | 0.59  | 9.25E-08 | 0.61  | 0.57  | 0.03  | 0.7740 |
| ILMN_3256478 | LOC100129034 | -0.86 | 2.66E-10 | -0.85 | -0.88 | 0.04  | 0.7750 |
| ILMN_2041236 | GARNL4       | -0.59 | 4.77E-12 | -0.61 | -0.58 | -0.02 | 0.7751 |
| ILMN_2367428 | FAM96A       | -0.89 | 2.26E-15 | -0.87 | -0.91 | 0.04  | 0.7758 |
| ILMN_2389970 | TSPAN32      | -0.93 | 2.46E-16 | -0.95 | -0.92 | -0.03 | 0.7758 |
| ILMN_2061732 | YRDC         | 0.71  | 6.78E-14 | 0.69  | 0.72  | -0.03 | 0.7766 |
| ILMN_1835092 |              | 2.70  | 9.85E-25 | 2.72  | 2.67  | 0.05  | 0.7770 |
| ILMN_1789007 | APOC1        | -0.81 | 3.12E-06 | -0.77 | -0.84 | 0.07  | 0.7810 |
| ILMN_1758831 | RNF31        | 0.68  | 6.09E-13 | 0.67  | 0.69  | -0.03 | 0.7826 |
| ILMN_1725169 | INTS12       | 0.61  | 1.68E-14 | 0.59  | 0.62  | -0.03 | 0.7835 |
| ILMN_3206827 | LOC100131737 | 0.68  | 6.88E-13 | 0.67  | 0.70  | -0.03 | 0.7843 |
| ILMN_1688580 | CAMP         | -2.55 | 1.08E-07 | -2.47 | -2.64 | 0.16  | 0.7845 |
| ILMN_3178258 | FABP5L2      | -0.64 | 1.94E-04 | -0.67 | -0.61 | -0.06 | 0.7861 |
| ILMN_3237627 | LOC154761    | 0.97  | 1.69E-12 | 0.99  | 0.96  | 0.03  | 0.7881 |
| ILMN_2393450 | C14orf173    | -1.04 | 2.37E-12 | -1.02 | -1.06 | 0.04  | 0.7884 |
| ILMN_1662426 | AP2S1        | -1.32 | 2.35E-17 | -1.34 | -1.30 | -0.04 | 0.7884 |
| ILMN_1763452 | EV12B        | -1.14 | 2.56E-16 | -1.15 | -1.12 | -0.03 | 0.7890 |
| ILMN_3238435 | SNORA12      | 0.79  | 9.25E-06 | 0.76  | 0.82  | -0.06 | 0.7898 |
| ILMN_1721344 | MOBK2A       | -0.64 | 1.64E-09 | -0.66 | -0.62 | -0.03 | 0.7899 |
| ILMN_1732296 | ID3          | -0.67 | 2.78E-08 | -0.69 | -0.65 | -0.04 | 0.7900 |
| ILMN_1804955 | CTSF         | -0.65 | 5.42E-13 | -0.64 | -0.66 | 0.02  | 0.7911 |
| ILMN_1684183 | RAD9A        | 0.63  | 2.10E-11 | 0.61  | 0.64  | -0.03 | 0.7917 |
| ILMN_1769091 | PRCP         | -1.53 | 8.13E-24 | -1.55 | -1.52 | -0.03 | 0.7932 |
| ILMN_1704972 | TRIM5        | 2.11  | 7.31E-26 | 2.09  | 2.12  | -0.03 | 0.7948 |
| ILMN_1672728 | KCTD5        | -0.68 | 1.41E-12 | -0.69 | -0.67 | -0.02 | 0.7972 |
| ILMN_1752249 | FAM38A       | -1.03 | 4.44E-13 | -1.01 | -1.04 | 0.03  | 0.7974 |
| ILMN_1783702 | MORC3        | 1.07  | 5.67E-20 | 1.09  | 1.06  | 0.03  | 0.8010 |
| ILMN_1745599 | LOC643977    | 1.17  | 2.08E-17 | 1.19  | 1.16  | 0.02  | 0.8065 |



|              |              |       |          |       |       |       |        |
|--------------|--------------|-------|----------|-------|-------|-------|--------|
| ILMN_2406313 | RBCK1        | 1.32  | 8.24E-17 | 1.34  | 1.31  | 0.03  | 0.8070 |
| ILMN_3282174 | LOC646688    | -0.81 | 2.61E-08 | -0.80 | -0.83 | 0.03  | 0.8081 |
| ILMN_1785005 | NCF4         | -0.61 | 4.39E-06 | -0.59 | -0.63 | 0.04  | 0.8096 |
| ILMN_2388975 | CERK         | -0.84 | 5.27E-08 | -0.83 | -0.85 | 0.02  | 0.8113 |
| ILMN_2065783 | EXOC2        | 0.85  | 1.88E-16 | 0.84  | 0.86  | -0.02 | 0.8118 |
| ILMN_1776678 | GIMAP7       | 0.75  | 2.82E-10 | 0.74  | 0.76  | -0.02 | 0.8120 |
| ILMN_2119224 | KIFAP3       | 0.71  | 1.33E-13 | 0.71  | 0.72  | -0.02 | 0.8138 |
| ILMN_1698213 | RBM3         | 0.84  | 1.74E-08 | 0.82  | 0.85  | -0.03 | 0.8145 |
| ILMN_3206343 | LOC644914    | -0.68 | 3.38E-07 | -0.69 | -0.66 | -0.03 | 0.8195 |
| ILMN_1730575 | GCLC         | -0.75 | 7.10E-07 | -0.73 | -0.77 | 0.04  | 0.8208 |
| ILMN_1758673 | SLC44A1      | -1.19 | 1.19E-11 | -1.17 | -1.21 | 0.04  | 0.8218 |
| ILMN_1763447 | PLXNB2       | -1.87 | 3.41E-16 | -1.85 | -1.89 | 0.04  | 0.8224 |
| ILMN_1750321 | LBA1         | 1.79  | 3.61E-22 | 1.78  | 1.80  | -0.02 | 0.8234 |
| ILMN_1790472 | SLC25A28     | 1.32  | 1.75E-22 | 1.33  | 1.30  | 0.03  | 0.8235 |
| ILMN_1795826 | ATP6V0D1     | -0.83 | 4.72E-10 | -0.84 | -0.81 | -0.02 | 0.8235 |
| ILMN_1760890 | SEPN1        | -0.80 | 4.30E-10 | -0.81 | -0.78 | -0.03 | 0.8259 |
| ILMN_1740466 | FAM46A       | 0.66  | 1.82E-06 | 0.68  | 0.64  | 0.04  | 0.8280 |
| ILMN_1685045 | CHI3L2       | 0.76  | 1.60E-17 | 0.77  | 0.75  | 0.02  | 0.8292 |
| ILMN_2246956 | BCL2         | 0.74  | 1.06E-09 | 0.72  | 0.75  | -0.02 | 0.8302 |
| ILMN_1662686 | USPL1        | 0.67  | 2.80E-10 | 0.68  | 0.66  | 0.03  | 0.8305 |
| ILMN_1772359 | LAPTM5       | -0.82 | 1.14E-14 | -0.83 | -0.81 | -0.02 | 0.8308 |
| ILMN_1718136 | UQCRHL       | -0.61 | 9.60E-08 | -0.60 | -0.62 | 0.02  | 0.8314 |
| ILMN_1651433 | DCK          | 1.11  | 8.31E-17 | 1.10  | 1.13  | -0.03 | 0.8322 |
| ILMN_1752728 | FUCA1        | -2.26 | 2.50E-10 | -2.30 | -2.21 | -0.09 | 0.8357 |
| ILMN_2142554 | NENF         | -0.67 | 1.64E-07 | -0.69 | -0.66 | -0.03 | 0.8362 |
| ILMN_3240997 | ARAP3        | -0.63 | 1.77E-10 | -0.64 | -0.62 | -0.02 | 0.8384 |
| ILMN_1778599 | SP140        | 1.92  | 1.65E-22 | 1.93  | 1.91  | 0.02  | 0.8391 |
| ILMN_1711030 | OPLAH        | -0.62 | 4.53E-09 | -0.63 | -0.61 | -0.02 | 0.8408 |
| ILMN_1736729 | OAS2         | 2.92  | 8.79E-26 | 2.95  | 2.90  | 0.04  | 0.8410 |
| ILMN_2124802 | MT1H         | -1.69 | 2.30E-05 | -1.73 | -1.64 | -0.09 | 0.8416 |
| ILMN_1788059 | PCGF5        | 0.67  | 1.12E-19 | 0.68  | 0.66  | 0.01  | 0.8425 |
| ILMN_1807873 | SNX6         | 0.82  | 7.11E-13 | 0.81  | 0.83  | -0.02 | 0.8426 |
| ILMN_2377019 | CORO1B       | -0.89 | 3.17E-13 | -0.87 | -0.90 | 0.03  | 0.8434 |
| ILMN_1773865 | HSPA5        | -0.61 | 1.42E-11 | -0.60 | -0.62 | 0.02  | 0.8436 |
| ILMN_1687384 | IFI6         | 2.52  | 9.65E-23 | 2.51  | 2.54  | -0.03 | 0.8447 |
| ILMN_1763260 | HIF1A        | 1.33  | 2.26E-15 | 1.34  | 1.32  | 0.03  | 0.8456 |
| ILMN_1691071 | FCRLA        | 0.76  | 3.90E-05 | 0.77  | 0.74  | 0.03  | 0.8461 |
| ILMN_2135272 | GIMAP2       | 0.72  | 6.08E-05 | 0.70  | 0.73  | -0.02 | 0.8465 |
| ILMN_1728047 | AKR1A1       | -0.77 | 1.03E-11 | -0.78 | -0.76 | -0.02 | 0.8473 |
| ILMN_1710434 | TBC1D10C     | -1.07 | 2.75E-08 | -1.06 | -1.09 | 0.04  | 0.8486 |
| ILMN_3272603 | FAM60A       | 1.22  | 2.59E-20 | 1.21  | 1.23  | -0.02 | 0.8492 |
| ILMN_1735910 | VMO1         | -2.23 | 6.93E-10 | -2.19 | -2.26 | 0.07  | 0.8495 |
| ILMN_1651826 | BASP1        | 0.74  | 2.18E-07 | 0.76  | 0.73  | 0.03  | 0.8496 |
| ILMN_1676358 | RALB         | 1.27  | 4.65E-15 | 1.26  | 1.28  | -0.02 | 0.8505 |
| ILMN_1726597 | FAM65B       | 0.62  | 2.60E-06 | 0.60  | 0.63  | -0.02 | 0.8510 |
| ILMN_1688279 | PVRIG        | 0.69  | 5.68E-05 | 0.71  | 0.68  | 0.03  | 0.8523 |
| ILMN_1769705 | LOC440093    | 0.93  | 4.60E-15 | 0.92  | 0.94  | -0.02 | 0.8542 |
| ILMN_1711702 | CLEC2D       | 1.43  | 5.77E-17 | 1.42  | 1.44  | -0.02 | 0.8543 |
| ILMN_2094942 | 1-Mar        | -0.60 | 1.59E-09 | -0.59 | -0.61 | 0.02  | 0.8580 |
| ILMN_1761733 | HLA-DMB      | -1.99 | 3.97E-18 | -2.01 | -1.97 | -0.04 | 0.8591 |
| ILMN_1801710 | APBB1IP      | -0.76 | 8.44E-12 | -0.75 | -0.77 | 0.02  | 0.8604 |
| ILMN_1766657 | STOM         | 0.68  | 9.39E-13 | 0.67  | 0.69  | -0.02 | 0.8619 |
| ILMN_2224907 | C4orf34      | -0.66 | 7.43E-06 | -0.68 | -0.65 | -0.03 | 0.8630 |
| ILMN_1763007 | HIAT1        | 0.70  | 6.93E-14 | 0.69  | 0.71  | -0.02 | 0.8642 |
| ILMN_1714567 | AHNAK        | -1.81 | 6.33E-19 | -1.83 | -1.80 | -0.03 | 0.8646 |
| ILMN_3256712 | LOC100130828 | 0.71  | 6.90E-16 | 0.70  | 0.71  | -0.01 | 0.8654 |
| ILMN_1808405 | HLA-DQA1     | -0.77 | 2.49E-02 | -0.78 | -0.75 | -0.04 | 0.8656 |
| ILMN_1706553 | SMG7         | 0.61  | 4.08E-09 | 0.62  | 0.60  | 0.02  | 0.8670 |
| ILMN_1656185 | DEF8         | -0.71 | 2.22E-12 | -0.72 | -0.70 | -0.02 | 0.8678 |
| ILMN_1750785 | SYTL1        | -0.63 | 3.68E-09 | -0.64 | -0.62 | -0.02 | 0.8686 |
| ILMN_1728019 | PML          | 0.74  | 2.51E-18 | 0.75  | 0.74  | 0.01  | 0.8692 |
| ILMN_1790881 | HNMT         | -1.99 | 1.72E-15 | -1.97 | -2.00 | 0.03  | 0.8702 |
| ILMN_1789244 | SOX8         | 0.63  | 4.12E-06 | 0.64  | 0.62  | 0.02  | 0.8704 |
| ILMN_1702073 | ODF2L        | 1.67  | 3.06E-21 | 1.68  | 1.66  | 0.02  | 0.8716 |
| ILMN_1671731 | AVP11        | -2.38 | 1.97E-19 | -2.37 | -2.39 | 0.03  | 0.8727 |
| ILMN_1760741 | NDUFA9       | 0.81  | 4.79E-14 | 0.82  | 0.80  | 0.02  | 0.8741 |
| ILMN_1691156 | MT1A         | 1.08  | 6.80E-07 | 1.06  | 1.10  | -0.04 | 0.8761 |
| ILMN_2138765 | PLIN2        | -0.77 | 1.17E-04 | -0.76 | -0.78 | 0.02  | 0.8763 |
| ILMN_1718552 | CXCL13       | 2.22  | 3.55E-15 | 2.20  | 2.24  | -0.04 | 0.8769 |
| ILMN_2197365 | RGS2         | -0.78 | 3.69E-06 | -0.77 | -0.80 | 0.04  | 0.8795 |
| ILMN_1656011 | RGS1         | 3.13  | 1.55E-26 | 3.12  | 3.15  | -0.03 | 0.8810 |
| ILMN_1657810 | PPM1M        | -1.21 | 7.81E-18 | -1.22 | -1.20 | -0.01 | 0.8893 |
| ILMN_1762861 | HLA-F        | 0.69  | 1.27E-11 | 0.70  | 0.68  | 0.01  | 0.8906 |
| ILMN_1734316 | YME1L1       | 0.60  | 6.48E-12 | 0.59  | 0.61  | -0.01 | 0.8908 |

|              |              |       |          |       |       |       |        |
|--------------|--------------|-------|----------|-------|-------|-------|--------|
| ILMN_1668345 | OAF          | -0.83 | 2.27E-07 | -0.84 | -0.82 | -0.02 | 0.8937 |
| ILMN_1713266 | FAM46C       | 0.60  | 4.45E-04 | 0.61  | 0.59  | 0.02  | 0.8943 |
| ILMN_1703337 | LOC441763    | -0.83 | 3.23E-10 | -0.84 | -0.82 | -0.02 | 0.8956 |
| ILMN_2054070 | LOC553158    | 0.61  | 3.88E-15 | 0.62  | 0.60  | 0.01  | 0.8964 |
| ILMN_1695812 | KRT72        | -1.00 | 1.57E-05 | -1.01 | -0.99 | -0.02 | 0.8964 |
| ILMN_2284998 | SP100        | 1.65  | 5.58E-25 | 1.66  | 1.64  | 0.01  | 0.8970 |
| ILMN_1727045 | RASGRP3      | 1.52  | 3.77E-19 | 1.53  | 1.51  | 0.02  | 0.8973 |
| ILMN_2054607 | CYP4V2       | -0.61 | 3.69E-05 | -0.62 | -0.60 | -0.01 | 0.8979 |
| ILMN_1774836 | PLOD3        | -0.78 | 5.70E-09 | -0.78 | -0.77 | -0.01 | 0.8993 |
| ILMN_1665291 | NUB1         | 1.46  | 1.48E-23 | 1.45  | 1.47  | -0.01 | 0.9003 |
| ILMN_2312719 | EXOSC9       | 0.79  | 3.99E-10 | 0.78  | 0.80  | -0.02 | 0.9029 |
| ILMN_2401057 | CANX         | -0.96 | 3.34E-14 | -0.95 | -0.97 | 0.01  | 0.9033 |
| ILMN_2402416 | DNAJB6       | 0.66  | 4.82E-11 | 0.65  | 0.67  | -0.01 | 0.9041 |
| ILMN_1778374 | BSG          | -0.89 | 3.74E-06 | -0.87 | -0.90 | 0.03  | 0.9049 |
| ILMN_1701875 | ZYX          | -1.23 | 1.73E-14 | -1.24 | -1.23 | -0.01 | 0.9053 |
| ILMN_2370091 | NGFRAP1      | -0.93 | 2.40E-06 | -0.94 | -0.92 | -0.02 | 0.9056 |
| ILMN_2128428 | DAB2         | -1.00 | 1.11E-08 | -1.01 | -1.00 | -0.02 | 0.9058 |
| ILMN_1709683 | RASSF2       | -1.26 | 3.85E-14 | -1.27 | -1.25 | -0.02 | 0.9059 |
| ILMN_2061446 | AADA1        | -0.74 | 7.43E-11 | -0.75 | -0.73 | -0.01 | 0.9067 |
| ILMN_3249667 | LOC100133678 | -0.68 | 4.07E-02 | -0.69 | -0.67 | -0.03 | 0.9100 |
| ILMN_1777190 | CFD          | -1.48 | 1.49E-07 | -1.47 | -1.50 | 0.03  | 0.9105 |
| ILMN_1733176 | LIMS1        | -0.87 | 1.89E-06 | -0.88 | -0.86 | -0.02 | 0.9108 |
| ILMN_3266606 | FABP5L2      | -0.94 | 5.41E-05 | -0.96 | -0.93 | -0.03 | 0.9108 |
| ILMN_1697971 | TRIM38       | 0.89  | 1.46E-12 | 0.90  | 0.88  | 0.01  | 0.9119 |
| ILMN_2048636 | ME2          | 0.73  | 6.67E-11 | 0.72  | 0.74  | -0.01 | 0.9149 |
| ILMN_1753805 | PRKD2        | 0.96  | 6.94E-17 | 0.95  | 0.96  | -0.01 | 0.9156 |
| ILMN_1787345 | FKBP11       | 1.04  | 1.87E-12 | 1.05  | 1.04  | 0.01  | 0.9164 |
| ILMN_1686664 | MT2A         | 1.40  | 7.19E-12 | 1.39  | 1.41  | -0.02 | 0.9168 |
| ILMN_2358069 | MAD1L1       | -0.66 | 7.70E-08 | -0.66 | -0.67 | 0.01  | 0.9190 |
| ILMN_1659752 | LOC730996    | 0.86  | 1.14E-20 | 0.86  | 0.87  | -0.01 | 0.9228 |
| ILMN_1748473 | GIMAP4       | 0.75  | 5.35E-12 | 0.75  | 0.75  | 0.01  | 0.9242 |
| ILMN_1793220 | GART         | 0.78  | 1.61E-20 | 0.79  | 0.78  | 0.01  | 0.9252 |
| ILMN_1707720 | SLC1A5       | -0.65 | 3.60E-10 | -0.64 | -0.66 | 0.01  | 0.9260 |
| ILMN_1712888 | HSPH1        | 0.61  | 1.76E-09 | 0.61  | 0.60  | 0.01  | 0.9261 |
| ILMN_2304186 | MITF         | -0.75 | 2.82E-11 | -0.76 | -0.74 | -0.01 | 0.9265 |
| ILMN_3251587 | LOC100008589 | -1.63 | 1.52E-13 | -1.64 | -1.62 | -0.02 | 0.9276 |
| ILMN_1731180 | EXOC2        | 0.67  | 1.15E-15 | 0.68  | 0.67  | 0.01  | 0.9285 |
| ILMN_2369924 | NDUFB6       | -0.66 | 1.94E-12 | -0.66 | -0.65 | -0.01 | 0.9289 |
| ILMN_1755115 | RPL23        | -0.62 | 8.30E-04 | -0.61 | -0.62 | 0.01  | 0.9290 |
| ILMN_1797933 | MRPL17       | 0.71  | 3.90E-14 | 0.72  | 0.71  | 0.01  | 0.9295 |
| ILMN_3191695 | LOC100128266 | 0.72  | 9.74E-08 | 0.71  | 0.72  | -0.01 | 0.9303 |
| ILMN_1738704 | TRIM26       | 0.96  | 2.64E-12 | 0.95  | 0.96  | -0.01 | 0.9309 |
| ILMN_1735155 | GLB1         | -1.15 | 4.83E-15 | -1.14 | -1.16 | 0.01  | 0.9321 |
| ILMN_1700109 | PTOV1        | -0.89 | 3.38E-07 | -0.90 | -0.88 | -0.02 | 0.9338 |
| ILMN_2319077 | FAS          | 0.95  | 1.07E-14 | 0.95  | 0.96  | -0.01 | 0.9354 |
| ILMN_1715173 | RPS6KA1      | -1.26 | 6.49E-17 | -1.27 | -1.26 | -0.01 | 0.9362 |
| ILMN_1804530 | LOC653888    | -0.59 | 2.00E-06 | -0.59 | -0.58 | -0.01 | 0.9370 |
| ILMN_1718621 | TSPAN32      | -1.89 | 1.51E-18 | -1.90 | -1.89 | -0.01 | 0.9377 |
| ILMN_1749244 | LYRM1        | 0.71  | 5.28E-13 | 0.72  | 0.71  | 0.01  | 0.9425 |
| ILMN_1709204 | CLEC4A       | -1.93 | 3.28E-14 | -1.94 | -1.93 | -0.01 | 0.9427 |
| ILMN_1765578 | TIPARP       | 1.32  | 3.30E-18 | 1.33  | 1.32  | 0.01  | 0.9430 |
| ILMN_1659688 | LGALS3BP     | 1.96  | 1.47E-17 | 1.96  | 1.97  | -0.01 | 0.9430 |
| ILMN_1668063 | FCN1         | -4.48 | 1.23E-18 | -4.47 | -4.50 | 0.03  | 0.9445 |
| ILMN_2367215 | PRCP         | -1.61 | 5.23E-21 | -1.61 | -1.61 | -0.01 | 0.9473 |
| ILMN_1670723 | MSL3         | 1.01  | 1.24E-17 | 1.01  | 1.01  | 0.01  | 0.9477 |
| ILMN_1774823 | RPL34        | 0.75  | 1.09E-11 | 0.76  | 0.75  | 0.01  | 0.9482 |
| ILMN_1681239 | MYO1F        | -1.15 | 9.21E-15 | -1.15 | -1.15 | 0.01  | 0.9510 |
| ILMN_2370882 | ACSL5        | 0.59  | 4.14E-13 | 0.59  | 0.60  | -0.01 | 0.9525 |
| ILMN_1751330 | RBCK1        | 1.50  | 1.81E-18 | 1.49  | 1.50  | -0.01 | 0.9560 |
| ILMN_1685538 | LOC158345    | -0.72 | 1.96E-08 | -0.73 | -0.72 | -0.01 | 0.9565 |
| ILMN_2359800 | MS4A6A       | -1.29 | 2.42E-05 | -1.28 | -1.30 | 0.02  | 0.9567 |
| ILMN_2382403 | FCGR2B       | -0.66 | 3.12E-06 | -0.67 | -0.66 | -0.01 | 0.9589 |
| ILMN_1721035 | MS4A6A       | -1.54 | 3.07E-06 | -1.55 | -1.53 | -0.02 | 0.9592 |
| ILMN_1808707 | FSCN1        | 2.15  | 1.91E-12 | 2.16  | 2.14  | 0.02  | 0.9592 |
| ILMN_1720083 | EHD4         | 0.98  | 5.84E-10 | 0.97  | 0.98  | -0.01 | 0.9596 |
| ILMN_1735367 | HSD17B11     | -0.79 | 4.64E-11 | -0.79 | -0.79 | -0.01 | 0.9596 |
| ILMN_1789338 | SORBS3       | -0.81 | 3.08E-14 | -0.81 | -0.81 | 0.00  | 0.9605 |
| ILMN_1782704 | CD19         | 0.83  | 4.82E-06 | 0.83  | 0.82  | 0.01  | 0.9606 |
| ILMN_1793410 | SNTB1        | 0.84  | 2.82E-17 | 0.84  | 0.84  | 0.01  | 0.9608 |
| ILMN_3244434 | ARAP2        | 0.70  | 2.84E-12 | 0.70  | 0.70  | 0.01  | 0.9608 |
| ILMN_1653711 | FZD2         | -1.35 | 3.06E-12 | -1.35 | -1.36 | 0.01  | 0.9610 |
| ILMN_1724480 | AXIN2        | -0.63 | 2.91E-06 | -0.64 | -0.63 | 0.00  | 0.9628 |
| ILMN_1662839 | PLEKHA1      | -0.72 | 2.48E-09 | -0.72 | -0.72 | -0.01 | 0.9651 |
| ILMN_1671703 | ACTA2        | 1.41  | 1.55E-13 | 1.40  | 1.41  | 0.00  | 0.9652 |

|              |          |       |          |       |       |       |        |
|--------------|----------|-------|----------|-------|-------|-------|--------|
| ILMN_1706261 | SLCO3A1  | -0.70 | 3.15E-12 | -0.70 | -0.71 | 0.00  | 0.9658 |
| ILMN_1815878 | C11orf59 | -0.59 | 3.77E-06 | -0.59 | -0.59 | -0.01 | 0.9681 |
| ILMN_1815134 | PI4K2B   | 2.24  | 1.24E-31 | 2.24  | 2.24  | 0.00  | 0.9689 |
| ILMN_1726359 | NECAP1   | 0.61  | 1.89E-13 | 0.60  | 0.61  | 0.00  | 0.9697 |
| ILMN_1760109 | SLAMF6   | 0.72  | 1.29E-10 | 0.71  | 0.72  | 0.00  | 0.9707 |
| ILMN_1756071 | MFG8     | -1.05 | 2.30E-08 | -1.05 | -1.06 | 0.00  | 0.9718 |
| ILMN_2349658 | TSPO     | -1.35 | 1.73E-10 | -1.34 | -1.35 | 0.01  | 0.9722 |
| ILMN_2412214 | LGALS9   | 1.03  | 3.74E-08 | 1.03  | 1.04  | -0.01 | 0.9730 |
| ILMN_1794612 | UBA7     | 1.13  | 2.18E-15 | 1.13  | 1.14  | -0.01 | 0.9736 |
| ILMN_1769383 | GIMAP5   | 0.61  | 1.71E-05 | 0.61  | 0.61  | 0.00  | 0.9747 |
| ILMN_1673711 | HSP90AB1 | 0.86  | 1.13E-11 | 0.86  | 0.86  | 0.00  | 0.9748 |
| ILMN_1721713 | EXOSC9   | 0.88  | 2.10E-15 | 0.88  | 0.88  | 0.00  | 0.9749 |
| ILMN_1805737 | PFKP     | 1.26  | 2.61E-18 | 1.26  | 1.26  | 0.00  | 0.9783 |
| ILMN_1681101 | 1-Mar    | -0.62 | 4.03E-09 | -0.62 | -0.62 | 0.00  | 0.9790 |
| ILMN_1752899 | BCL11A   | 0.85  | 1.90E-07 | 0.85  | 0.85  | 0.00  | 0.9810 |
| ILMN_1669703 | TNK2     | 1.38  | 2.69E-19 | 1.39  | 1.38  | 0.00  | 0.9818 |
| ILMN_1803988 | MCL1     | 0.89  | 1.02E-12 | 0.89  | 0.89  | 0.00  | 0.9829 |
| ILMN_2119535 | RIPK1    | 0.74  | 1.14E-17 | 0.74  | 0.74  | 0.00  | 0.9830 |
| ILMN_1688959 | CD27     | -1.17 | 6.40E-08 | -1.16 | -1.17 | 0.00  | 0.9836 |
| ILMN_1720623 | SYTL3    | 0.90  | 5.31E-10 | 0.90  | 0.90  | 0.00  | 0.9844 |
| ILMN_1767816 | APH1B    | -0.68 | 8.40E-10 | -0.67 | -0.68 | 0.00  | 0.9848 |
| ILMN_1726189 | MS4A14   | -0.81 | 9.96E-05 | -0.81 | -0.81 | 0.00  | 0.9850 |
| ILMN_1821176 |          | -0.68 | 9.85E-07 | -0.68 | -0.68 | 0.00  | 0.9855 |
| ILMN_1714197 | ACSS2    | -1.12 | 6.55E-13 | -1.12 | -1.12 | 0.00  | 0.9863 |
| ILMN_1766487 | LRRC25   | -0.71 | 2.37E-07 | -0.71 | -0.71 | 0.00  | 0.9879 |
| ILMN_1696510 | GPR89C   | 0.65  | 1.36E-16 | 0.65  | 0.65  | 0.00  | 0.9904 |
| ILMN_1806023 | JUN      | 0.70  | 1.71E-06 | 0.71  | 0.70  | 0.00  | 0.9906 |
| ILMN_1747622 | CD33     | -1.07 | 1.80E-11 | -1.07 | -1.07 | 0.00  | 0.9909 |
| ILMN_1748283 | PIM2     | 1.29  | 1.02E-16 | 1.29  | 1.29  | 0.00  | 0.9912 |
| ILMN_1775182 | GSR      | -0.59 | 3.30E-07 | -0.59 | -0.59 | 0.00  | 0.9925 |
| ILMN_1716053 | AK2      | 0.82  | 4.02E-15 | 0.82  | 0.82  | 0.00  | 0.9939 |
| ILMN_1805992 | KIAA1598 | -1.61 | 4.54E-12 | -1.61 | -1.61 | 0.00  | 0.9949 |
| ILMN_1797731 | MS4A6A   | -1.54 | 1.31E-07 | -1.54 | -1.54 | 0.00  | 0.9950 |
| ILMN_1697567 | TPM3     | 0.98  | 8.58E-13 | 0.98  | 0.98  | 0.00  | 0.9957 |
| ILMN_1654396 | ITGB2    | -1.64 | 5.23E-20 | -1.64 | -1.64 | 0.00  | 0.9969 |
| ILMN_1663092 | CITED2   | -0.91 | 1.00E-11 | -0.91 | -0.91 | 0.00  | 0.9980 |
| ILMN_1796094 | CD36     | -3.53 | 1.01E-24 | -3.53 | -3.53 | 0.00  | 0.9981 |
| ILMN_2058795 | PGCP     | -1.11 | 2.61E-11 | -1.11 | -1.11 | 0.00  | 0.9982 |
| ILMN_1699022 | ENDOD1   | 1.39  | 3.68E-19 | 1.39  | 1.39  | 0.00  | 0.9990 |
| ILMN_1813455 | SP110    | 1.33  | 5.16E-13 | 1.33  | 1.33  | 0.00  | 0.9999 |

**Table S3. List of differentially expressed polyI:C responsive genes in macrophages and PBMCs that overlap between expression arrays and previous RNAi studies**

| PBMC          |                | Macrophage    |                |
|---------------|----------------|---------------|----------------|
| Li et al 2009 | Tai et al 2009 | Li et al 2009 | Tai et al 2009 |
| APLP2         | TGM1           | CASP4         | NAPA           |
| ARRDC2        | CHST12         | E2F2          | IL4I1          |
| CASP4         | IL4I1          | HSPA1A        | SERBP1         |
| CCPG1         | SERPINB2       | IFITM3        | DTX3L          |
| CTSF          | CTSF           | PSME1         | IFITM1         |
| CYBA          | RAN            | RIPK2         | BCAT1          |
| FCGRT         | DTX3L          | SLC11A1       |                |
| FER1L3        | IFITM1         | WDR37         |                |
| IFITM3        |                | HIST1H2BK     |                |
| PARP11        |                | IMPDH1        |                |
| PEMT          |                |               |                |
| RIPK2         |                |               |                |
| RNF31         |                |               |                |
| SH3TC1        |                |               |                |
| UBA52         |                |               |                |
| USP42         |                |               |                |
| WDR37         |                |               |                |
| ZNF467        |                |               |                |
| C7orf41       |                |               |                |
| KCTD14        |                |               |                |
| PELI1         |                |               |                |
| COTL1         |                |               |                |
| CSF3R         |                |               |                |
| IMPDH1        |                |               |                |
