# Supplementary material
Source: PubMed Central journal article supplement (PMC3571267)

Figure S1

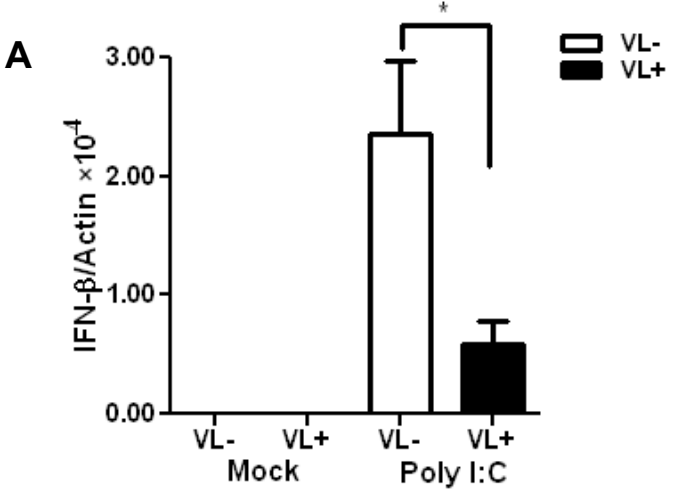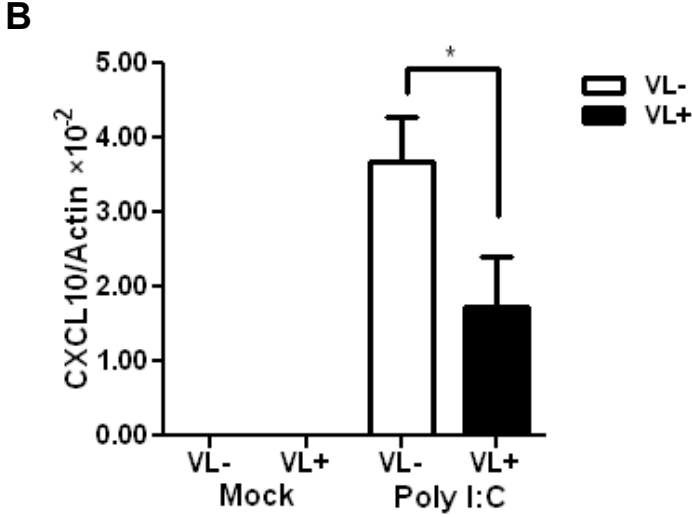

Figure S2

**A**

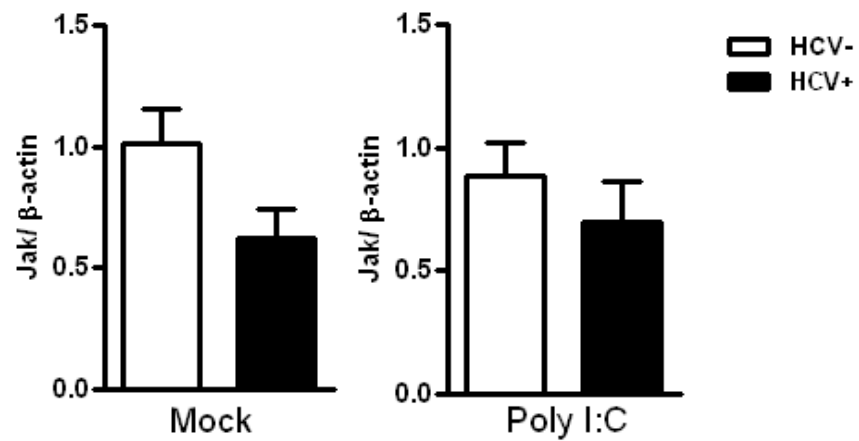

**C**

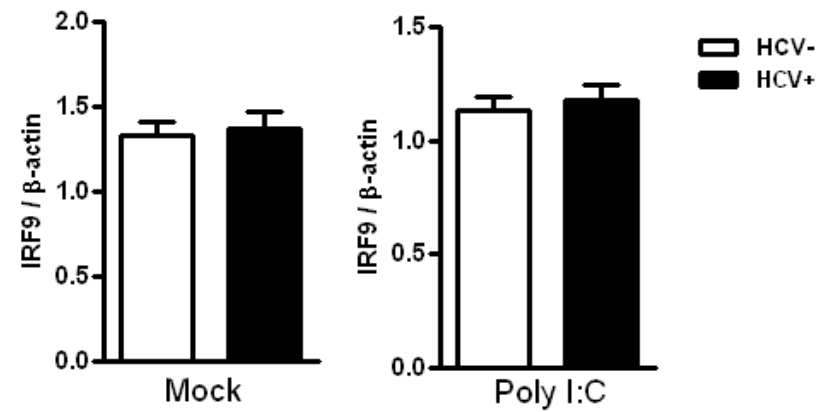

**B**

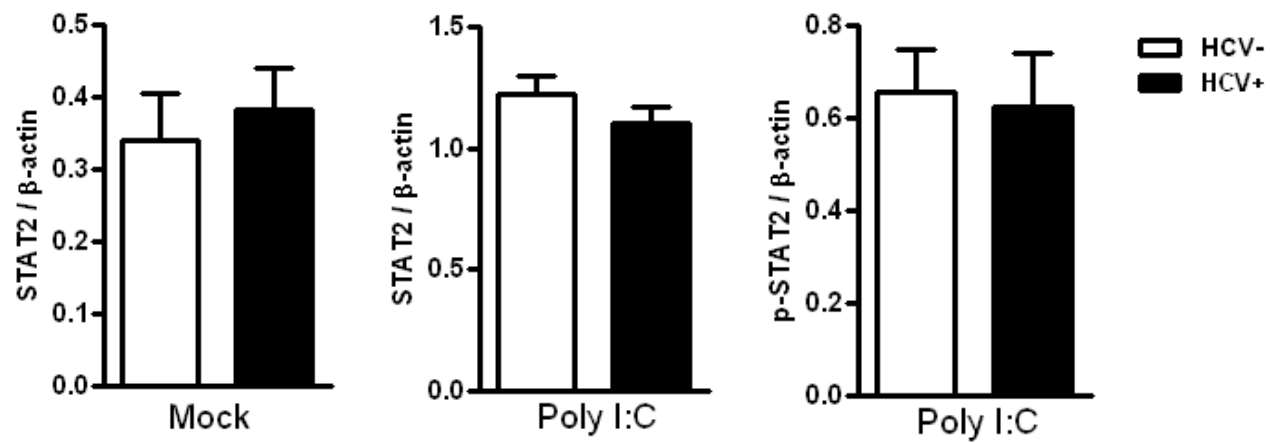

Supplement: CVI.00530-12_zcd999094646so3.pdf [file CVI.00530-12_zcd999094646so3.pdf]
